# Supplementary material for: Tunable Heteroaromatic Nitriles for Selective Bioorthogonal Click Reaction with Cysteine
Source: PubMed Central journal article supplement (PMC10360065; doi:10.1021/acs.bioconjchem.3c00163), 2023-06-24

# $^1\text{H}$ , $^{13}\text{C}$ and $^1\text{H}$ - $^1\text{H}$ NOE NMR spectra

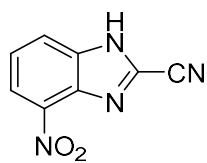

## Compound 2

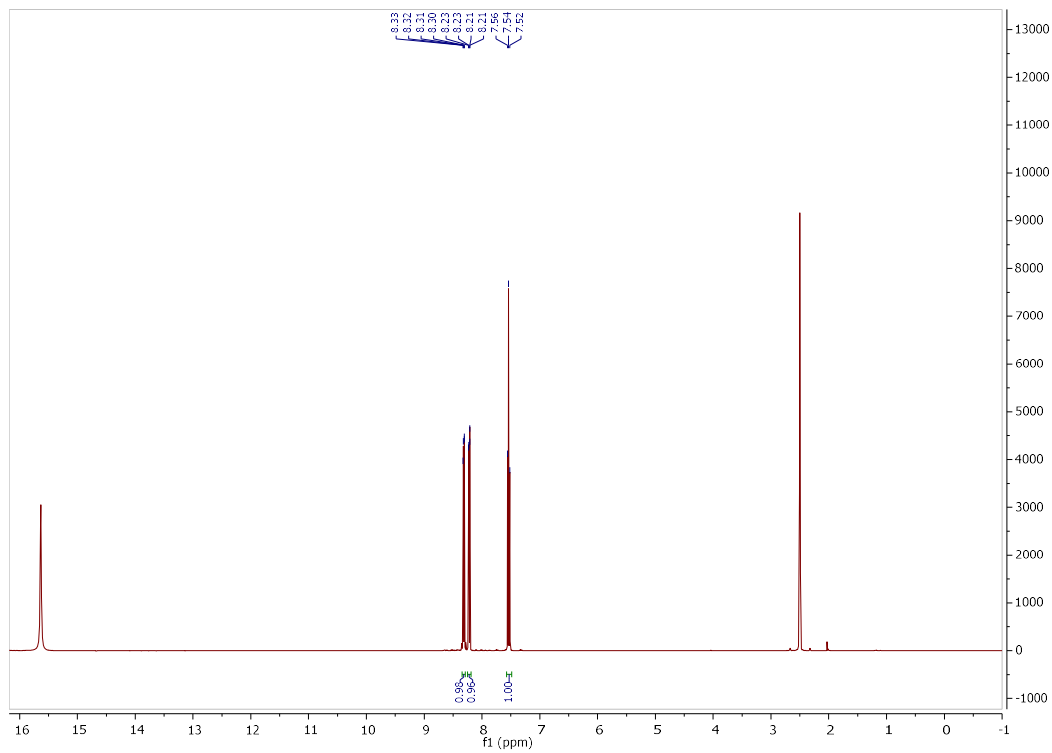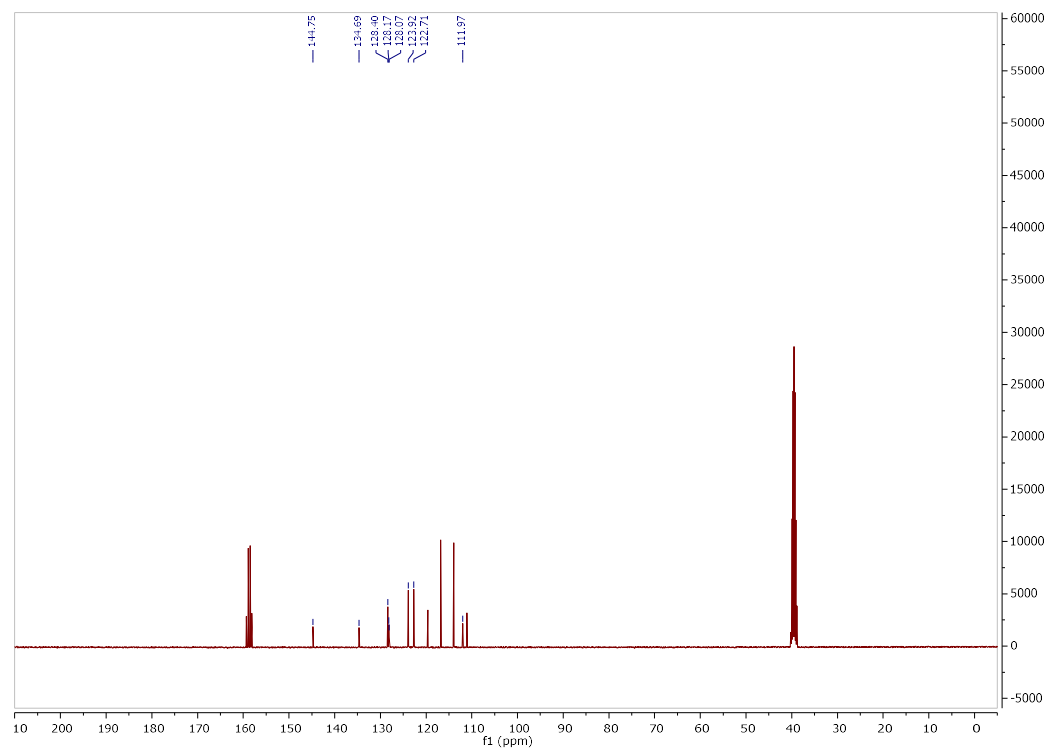

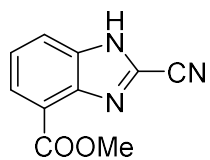

**Compound 3**

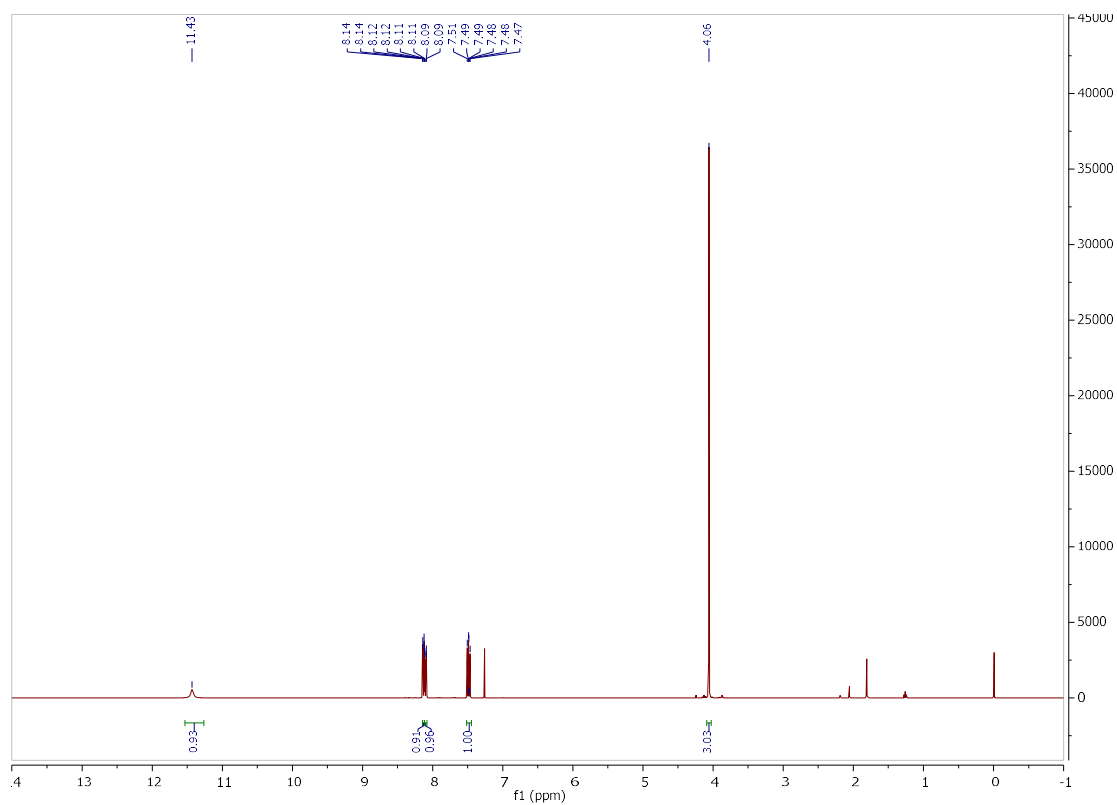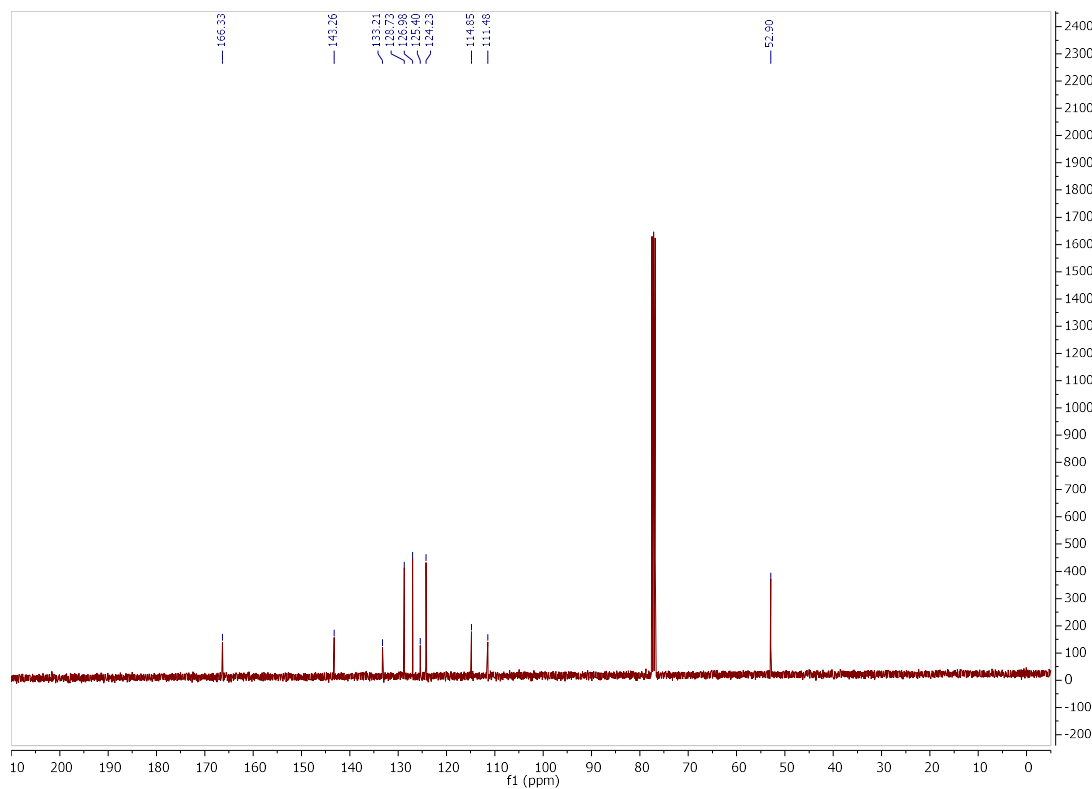

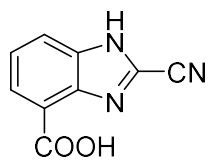

**Compound 4**

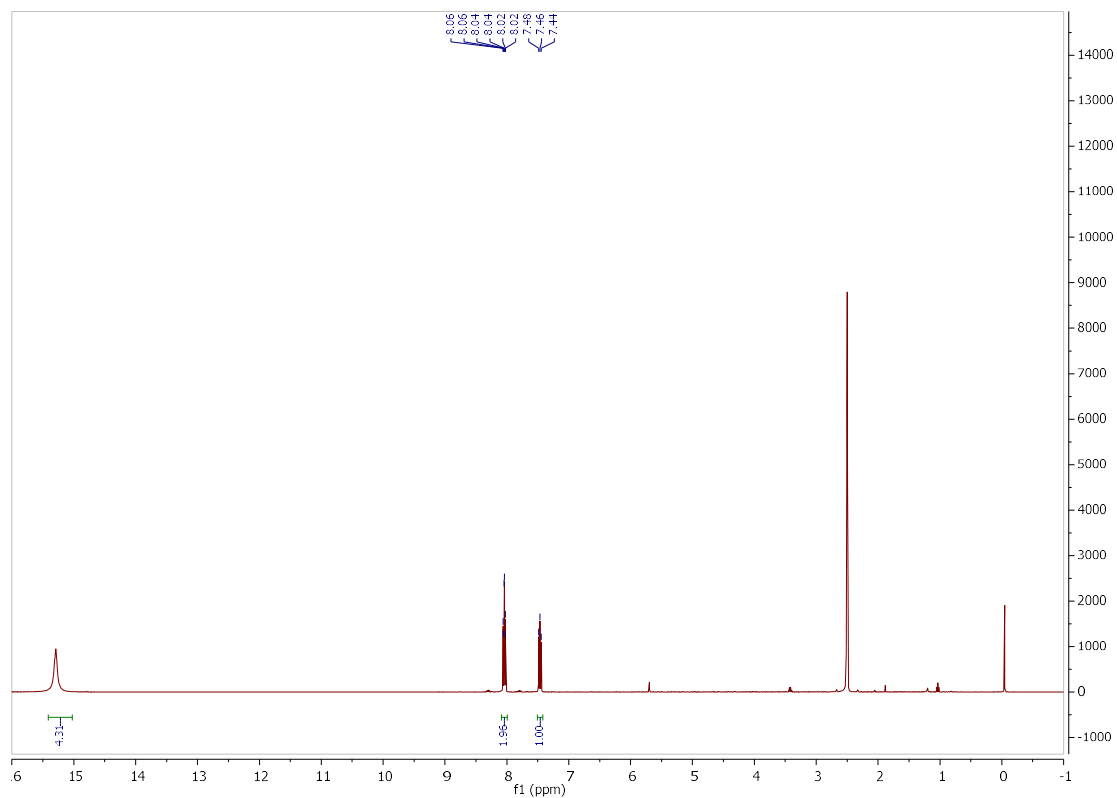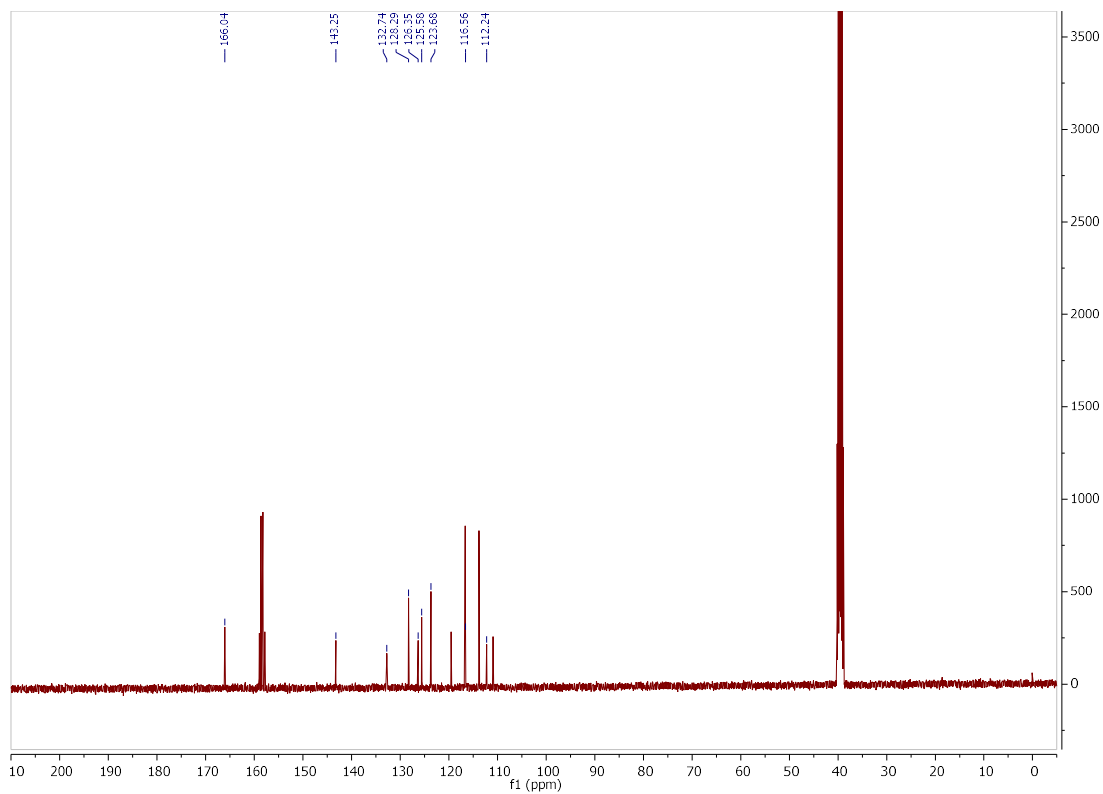

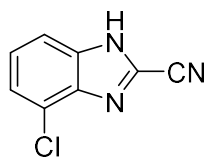

**Compound 5**

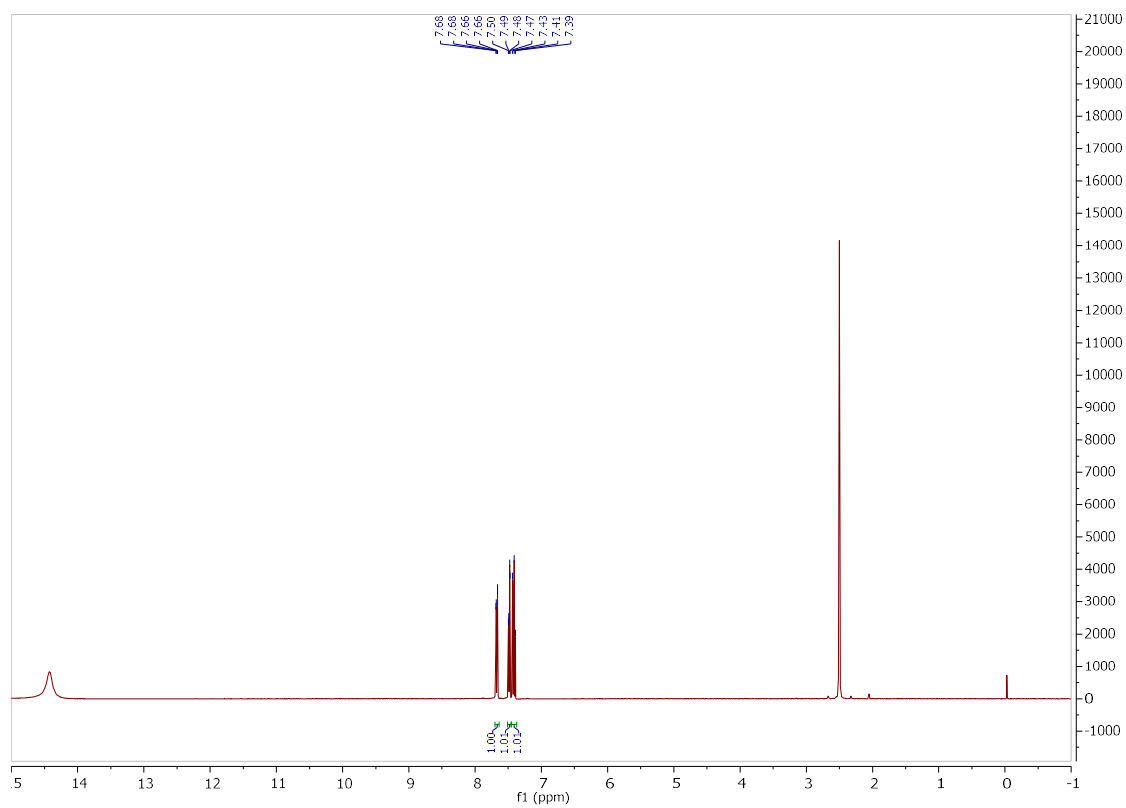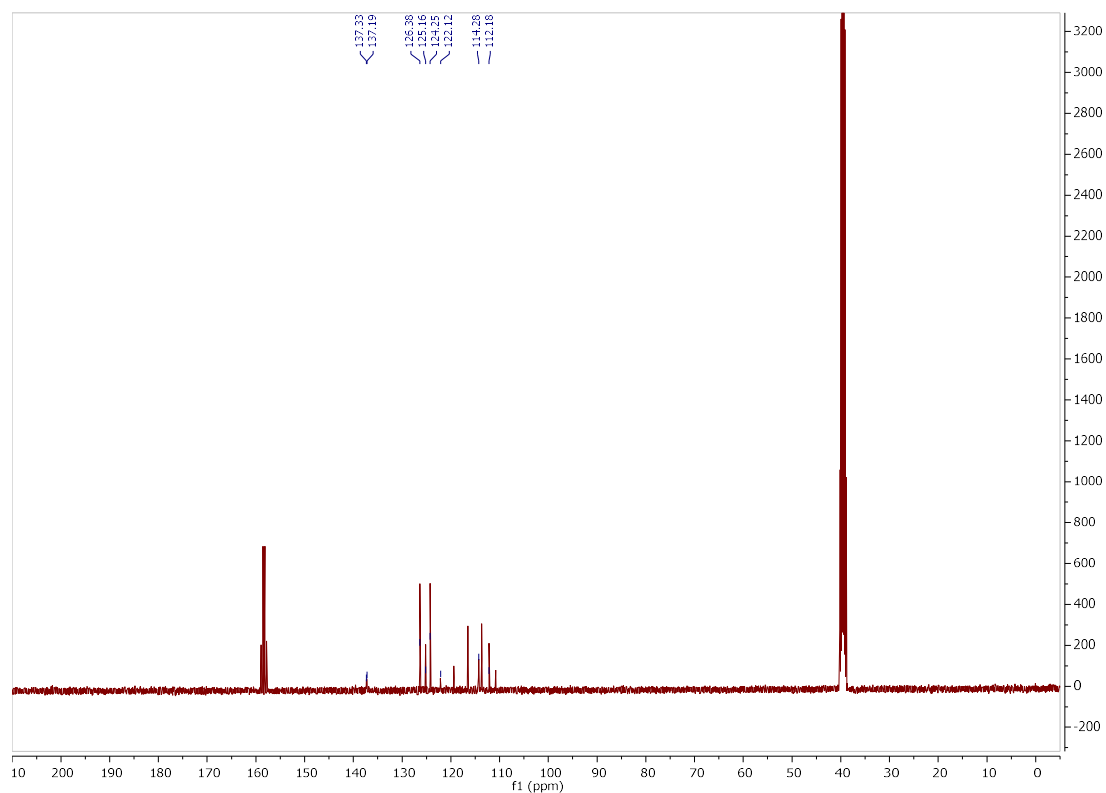

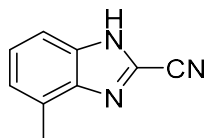

Compound 6

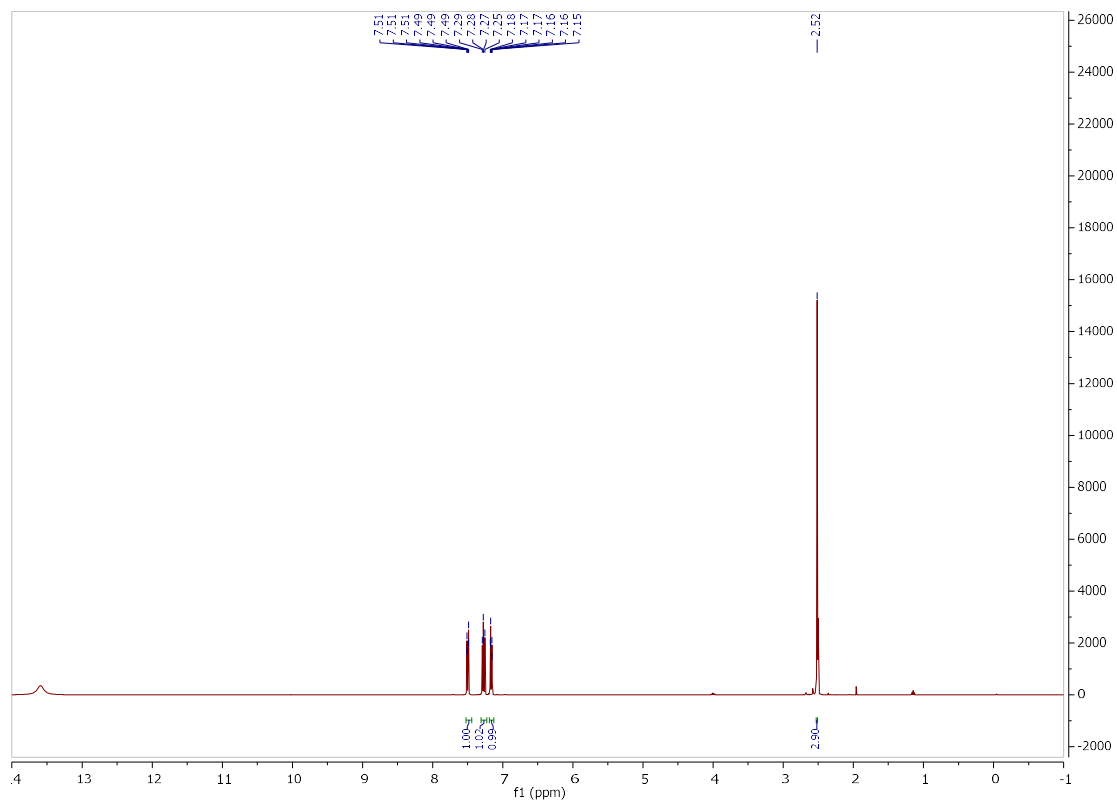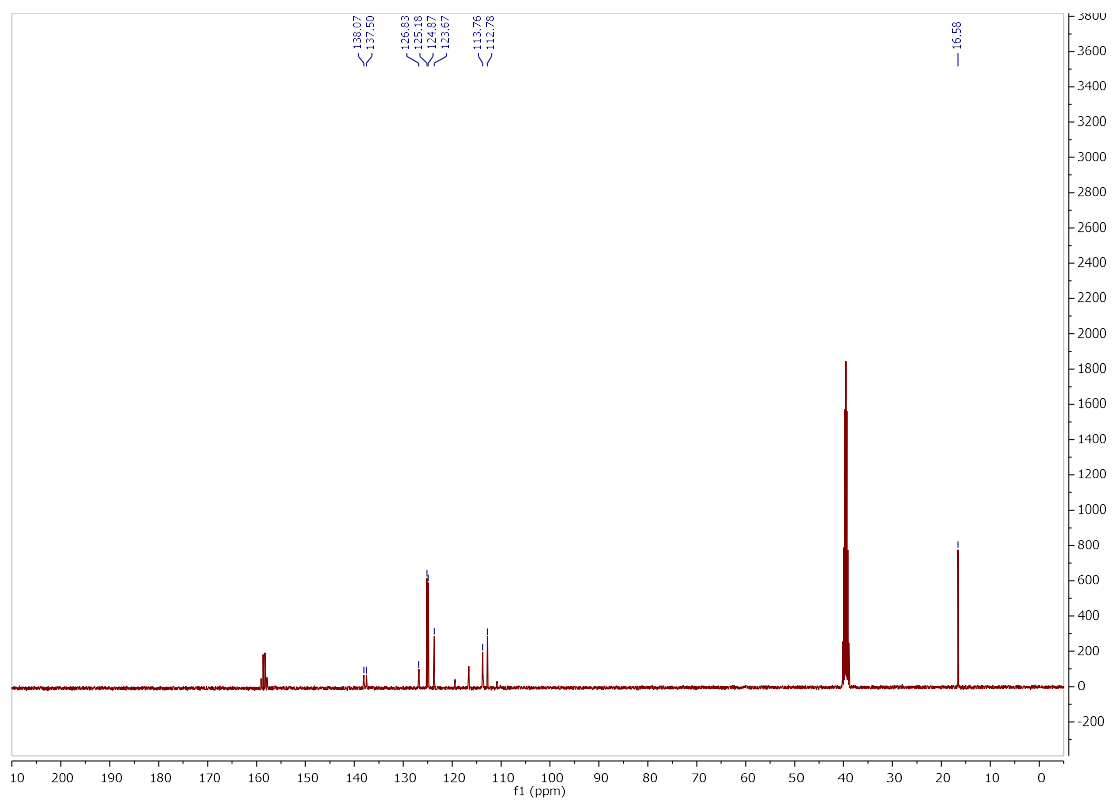

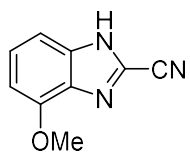

**Compound 7**

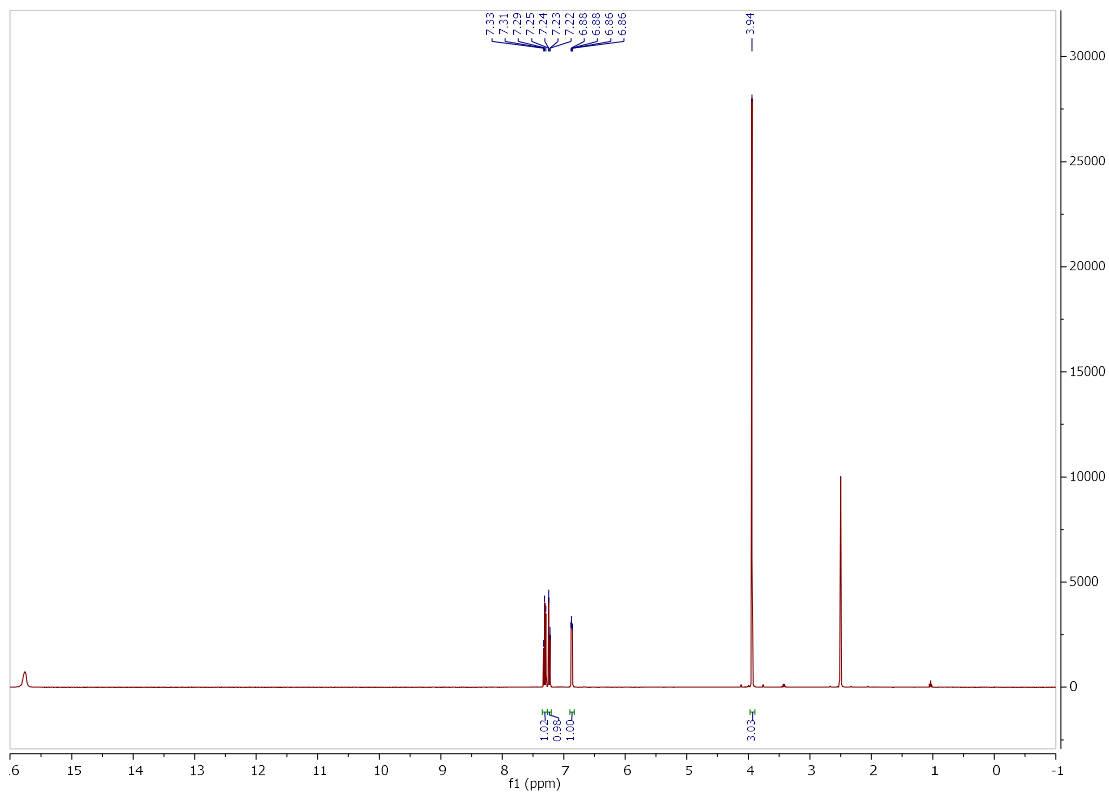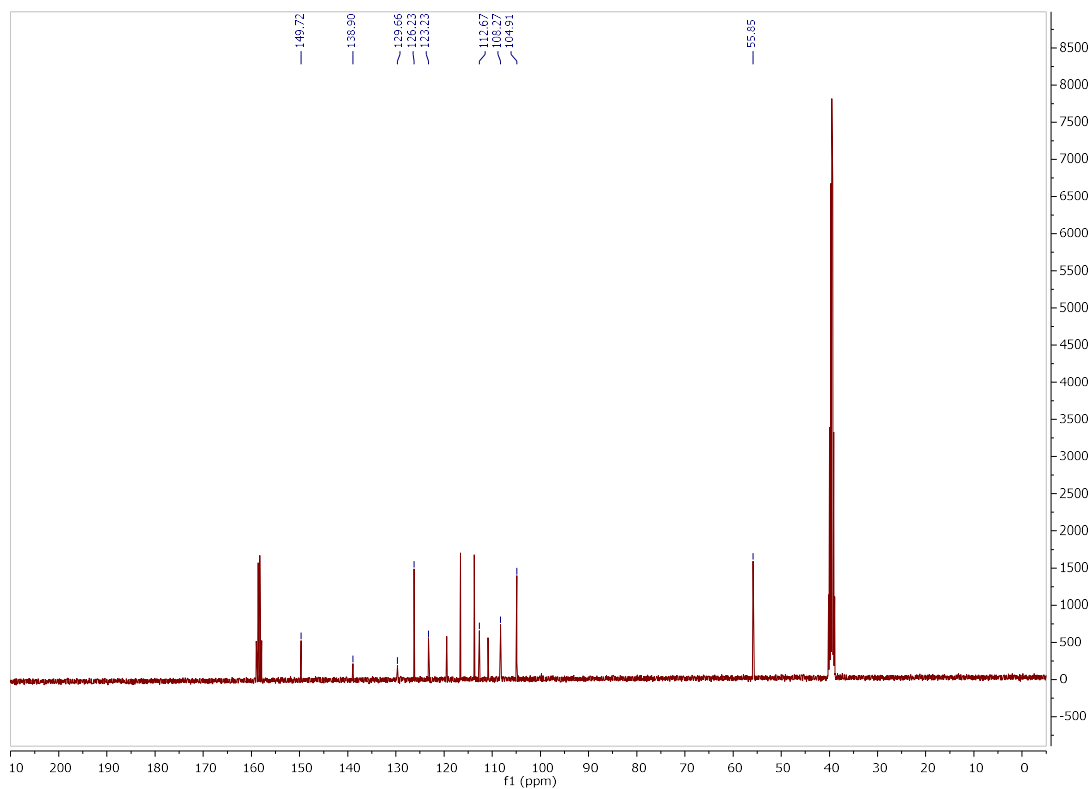

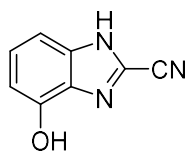

**Compound 8**

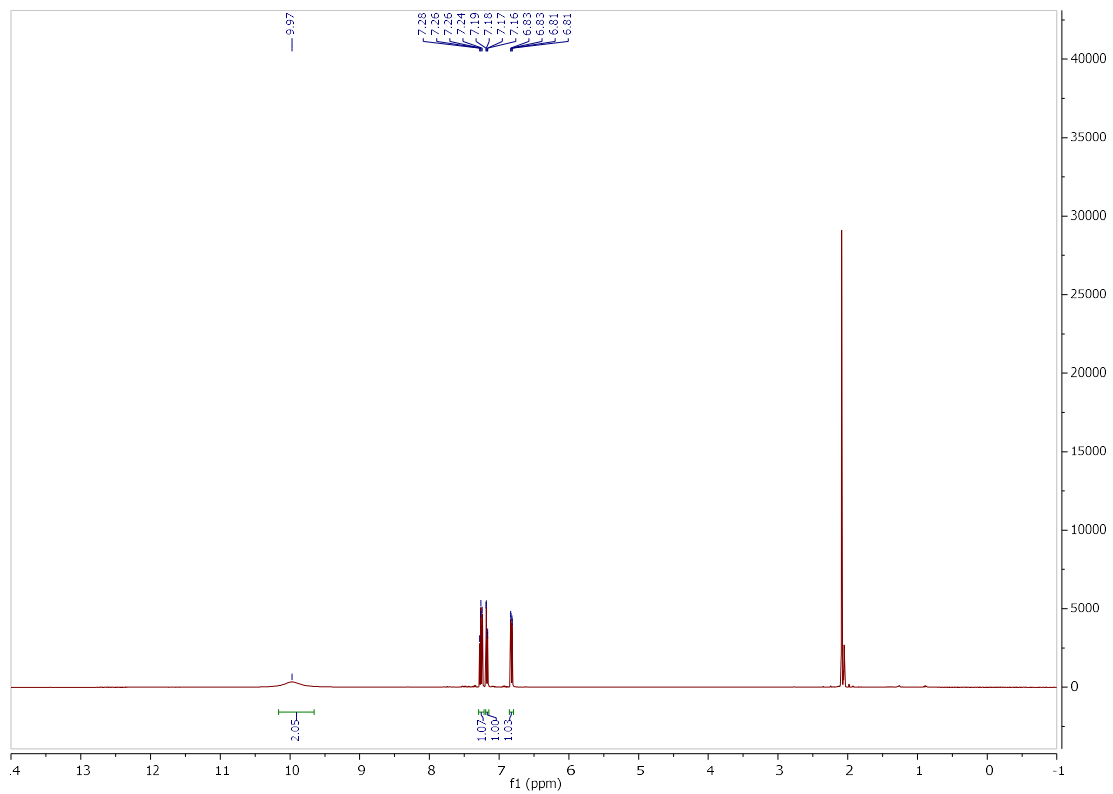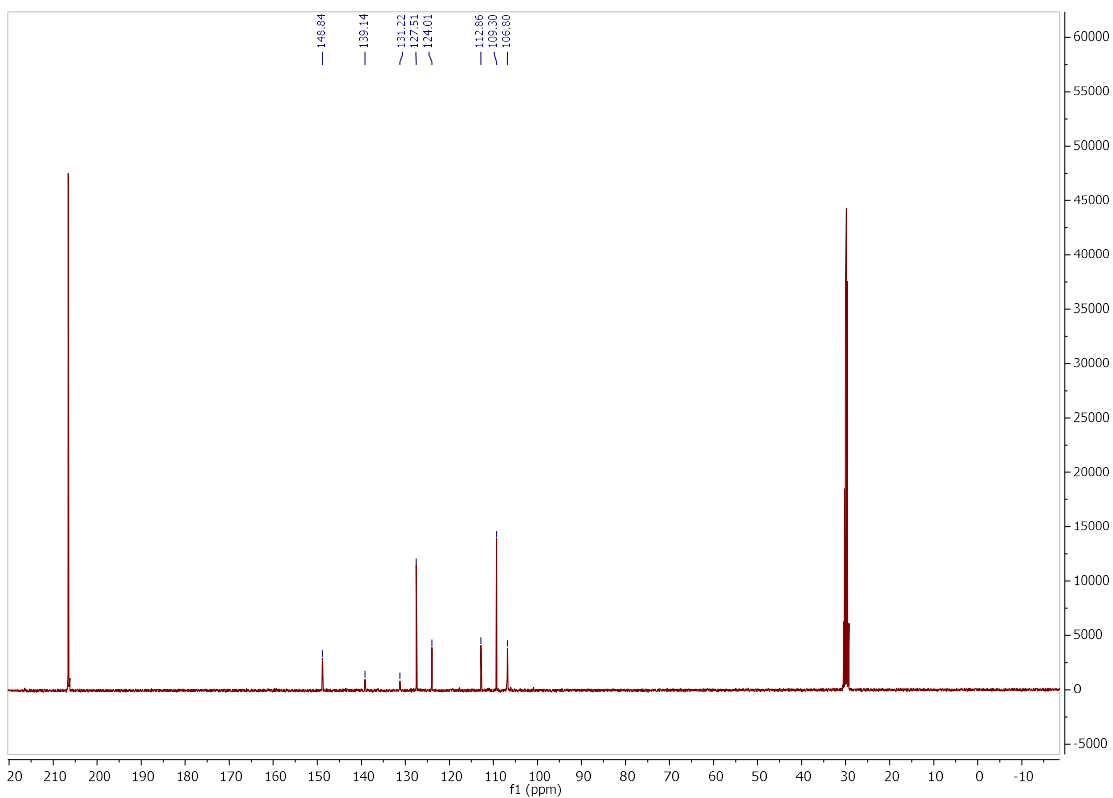

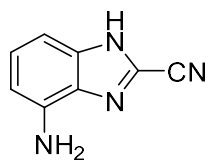

**Compound 9**

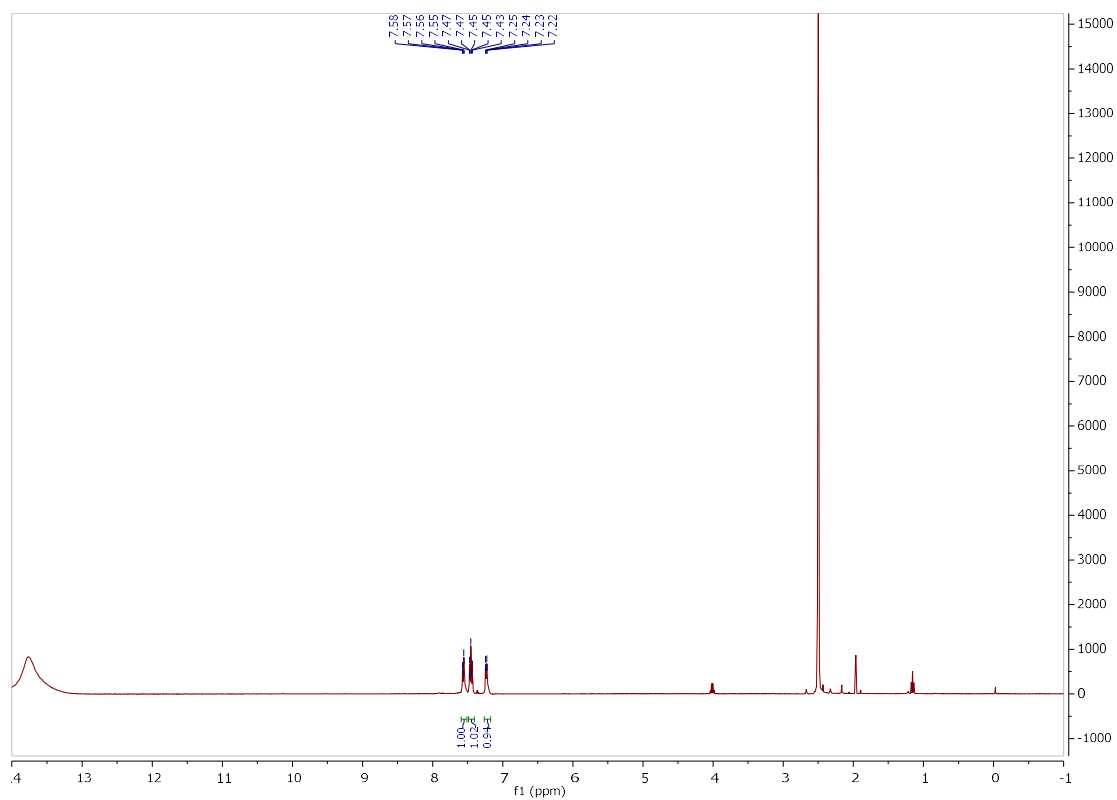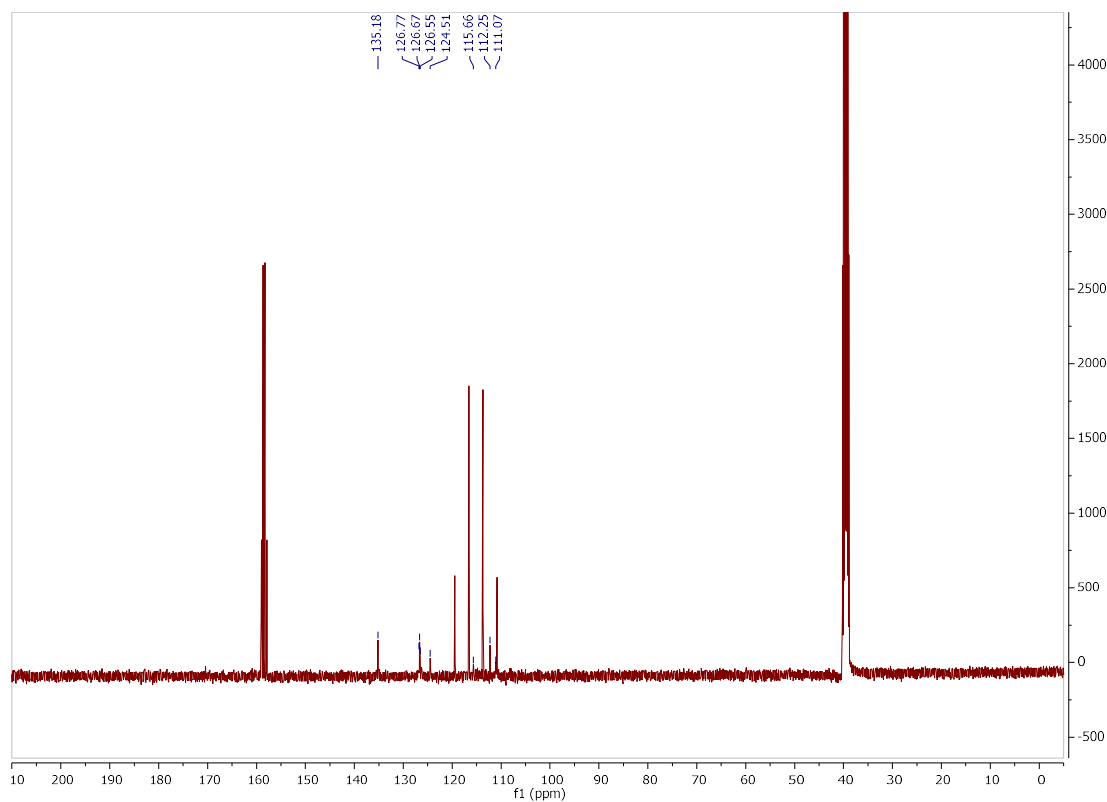



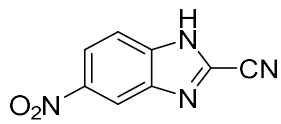

**Compound 10**

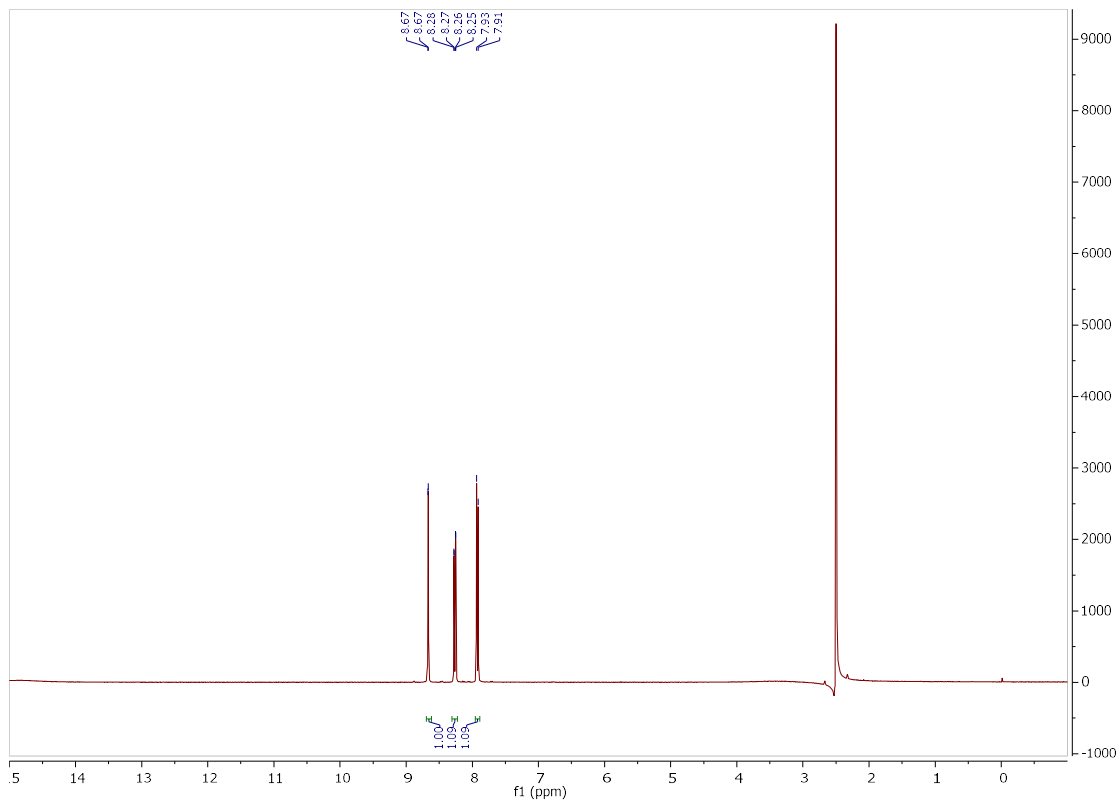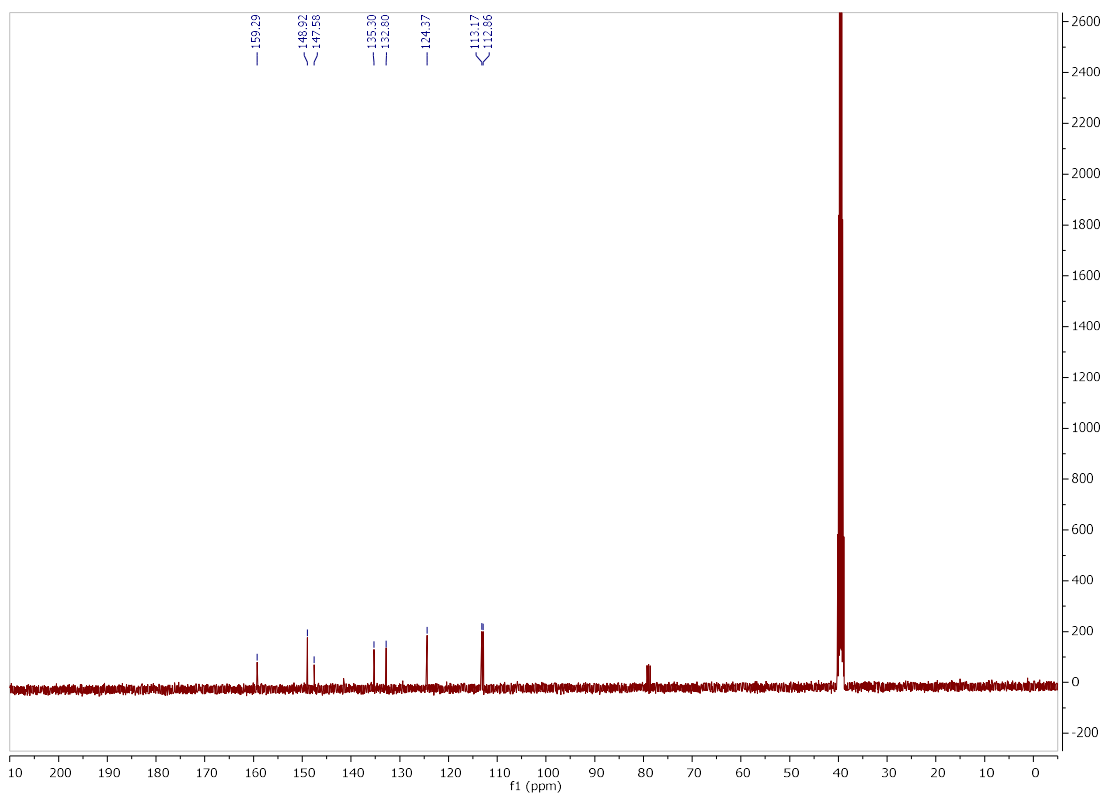

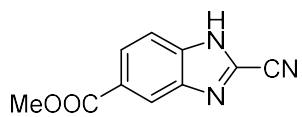

**Compound 11**

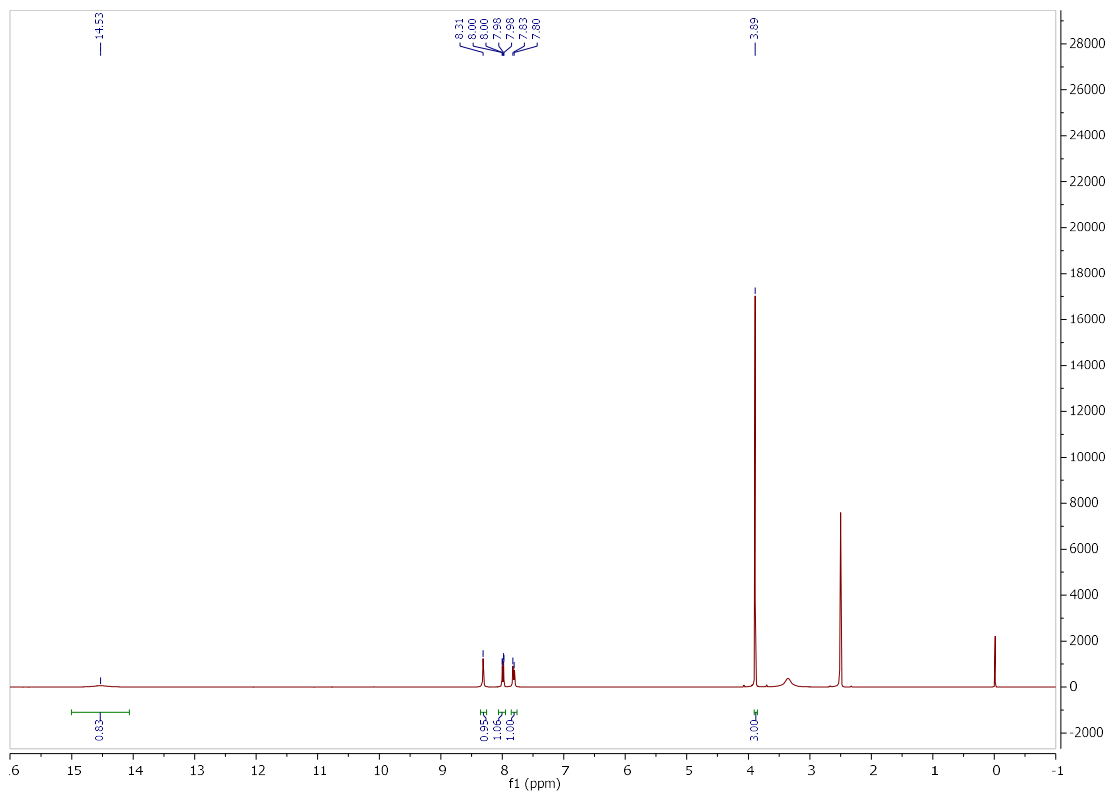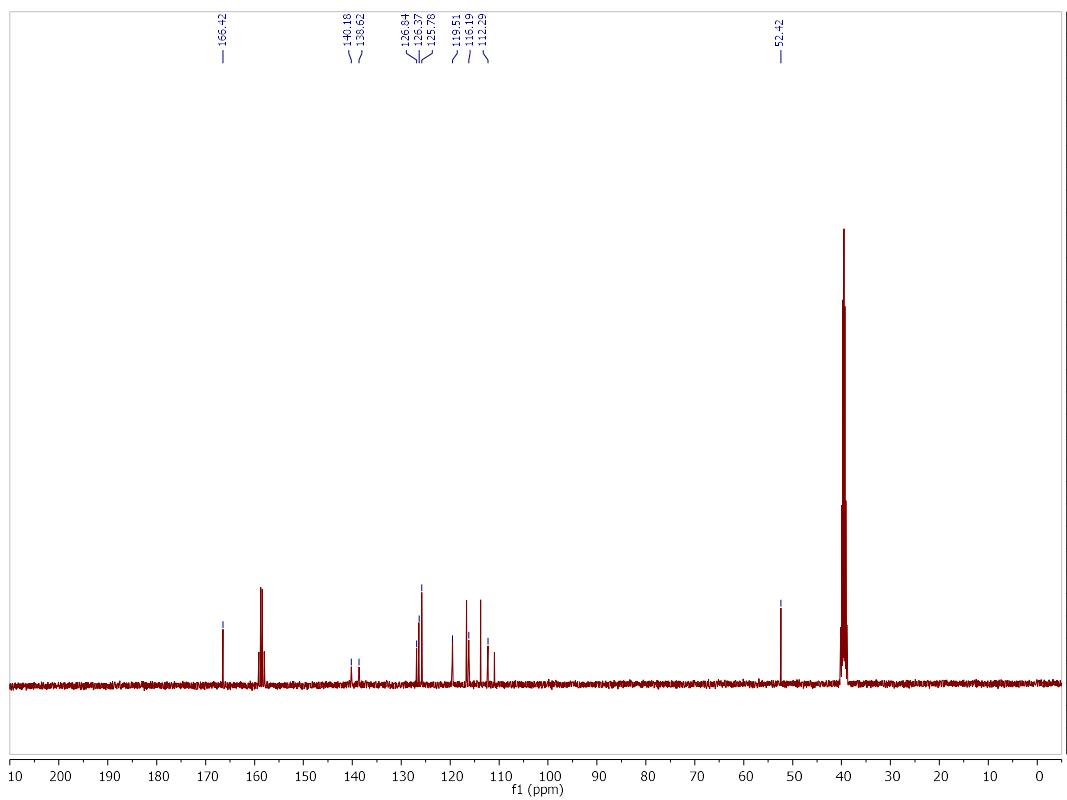

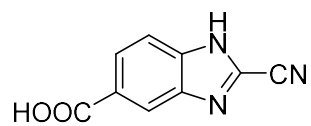

**Compound 12**

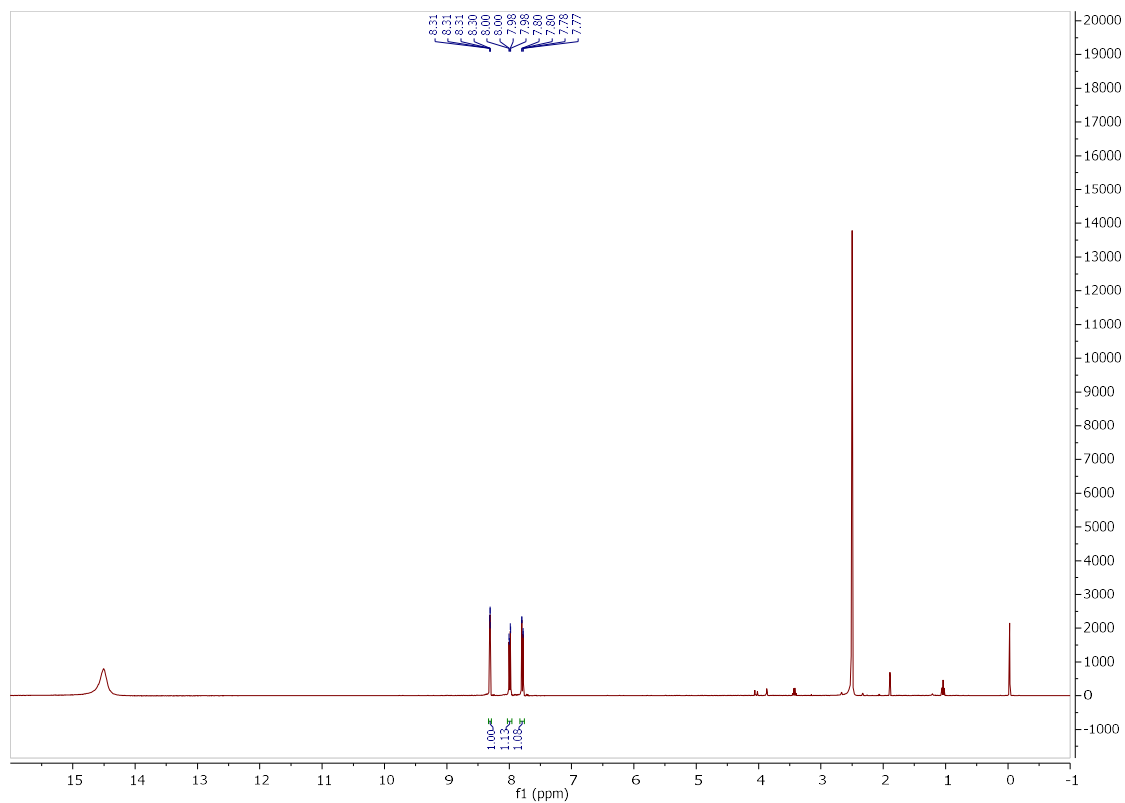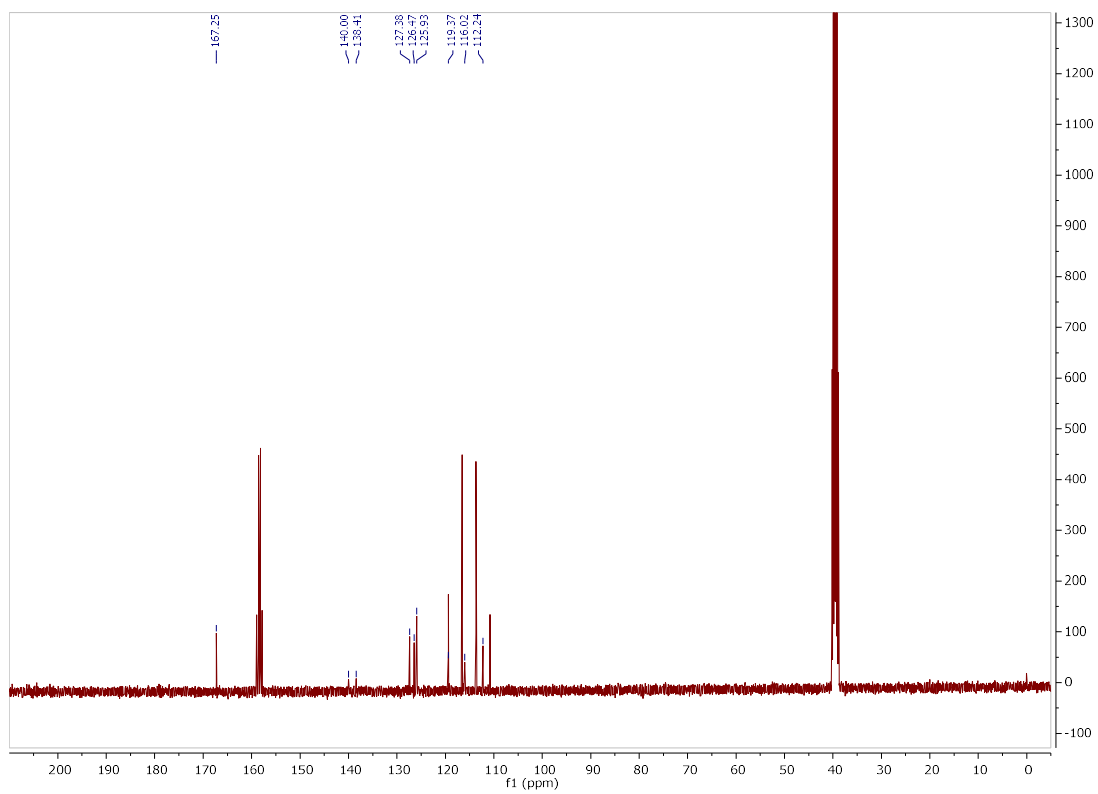

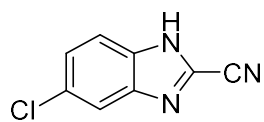

**Compound 13**

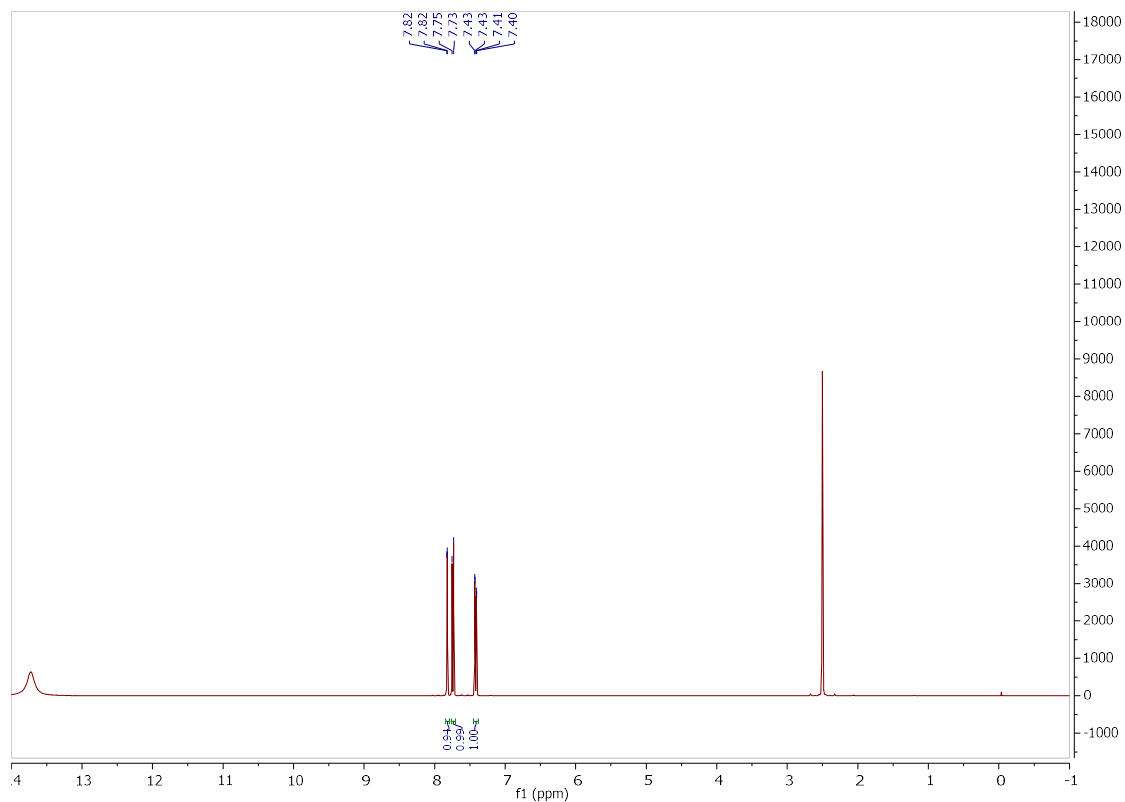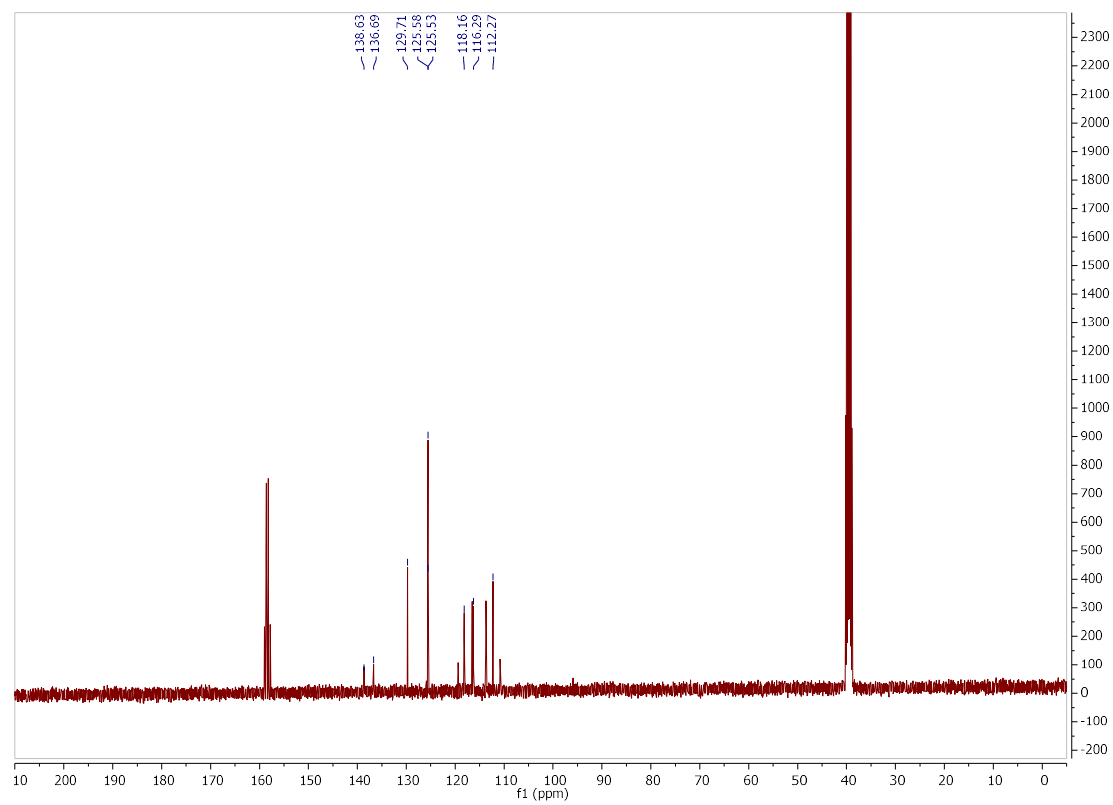

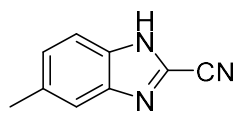

Compound 14

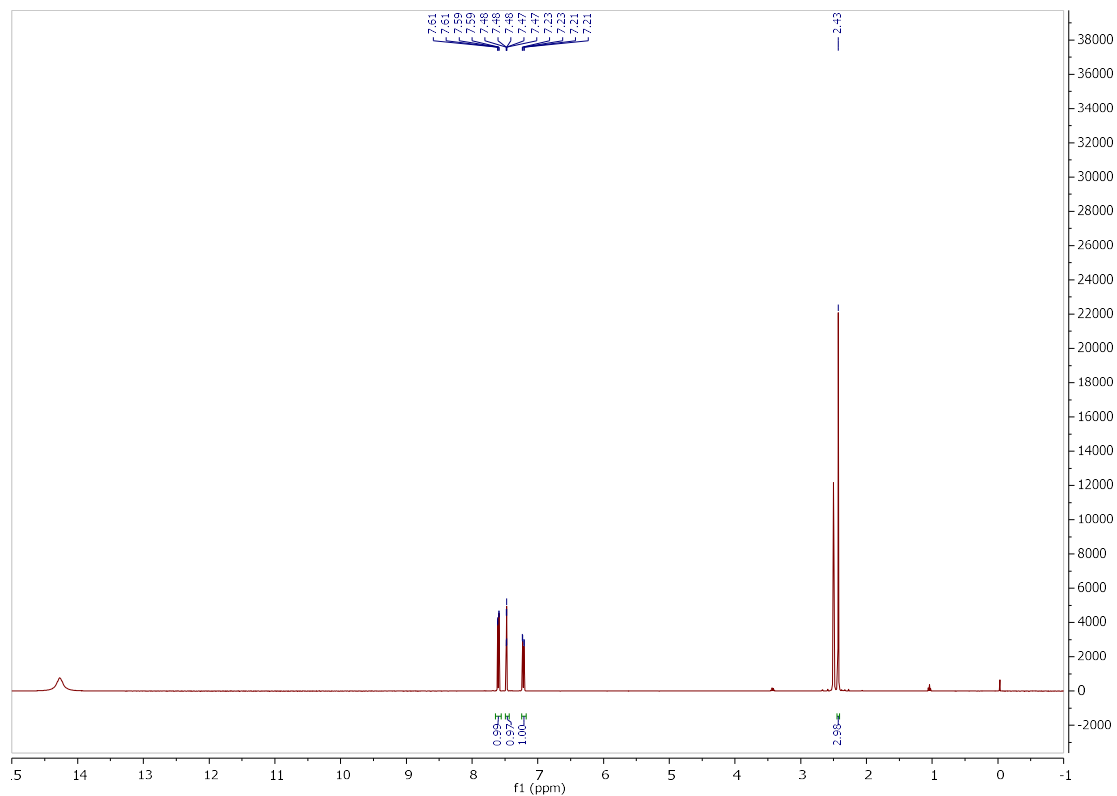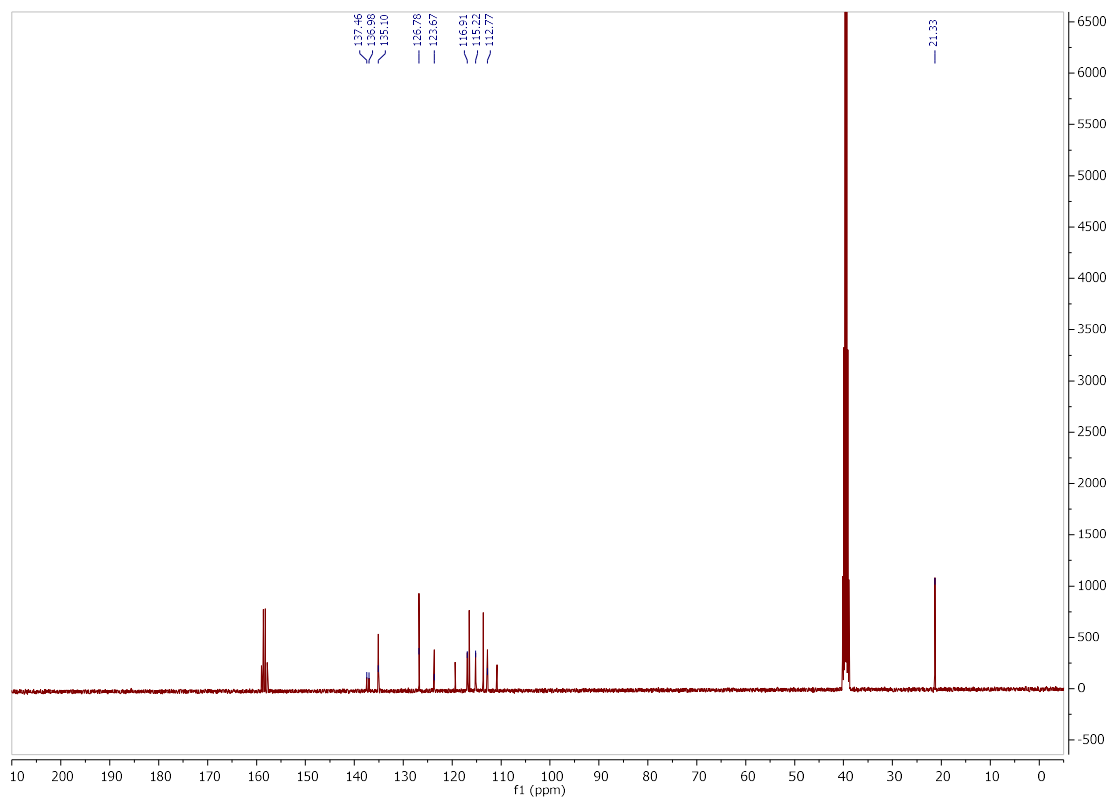

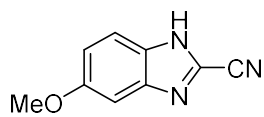

**Compound 15**

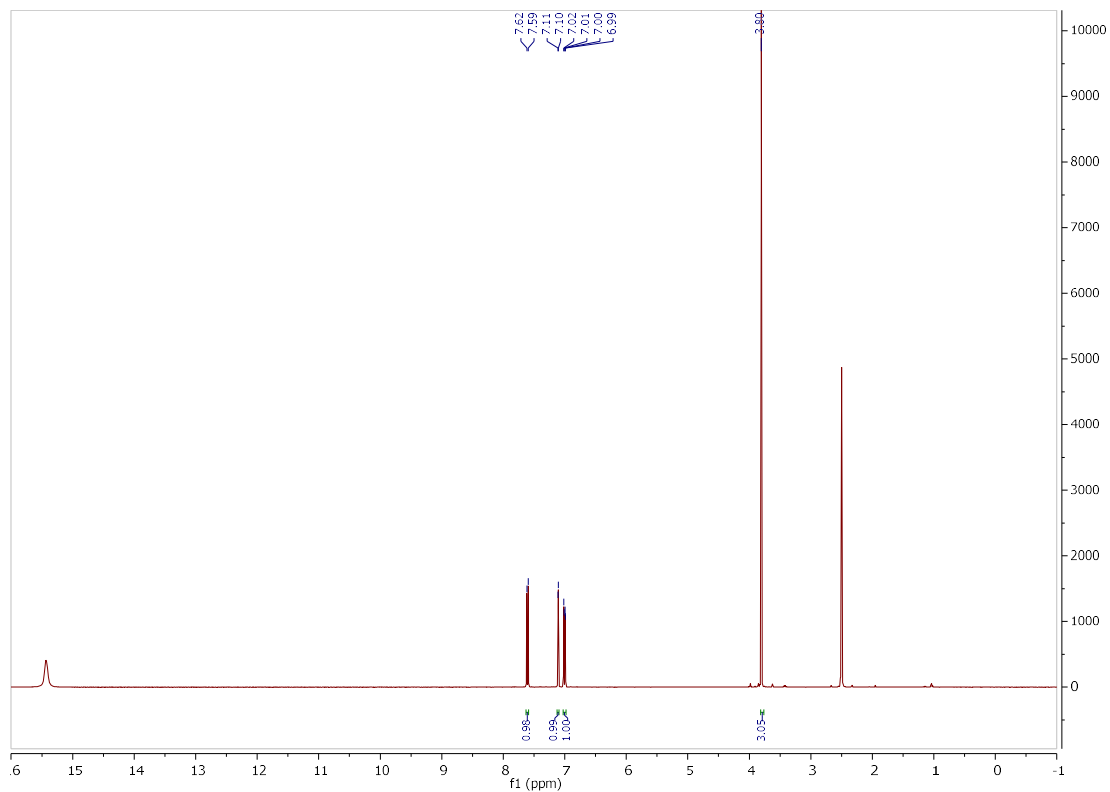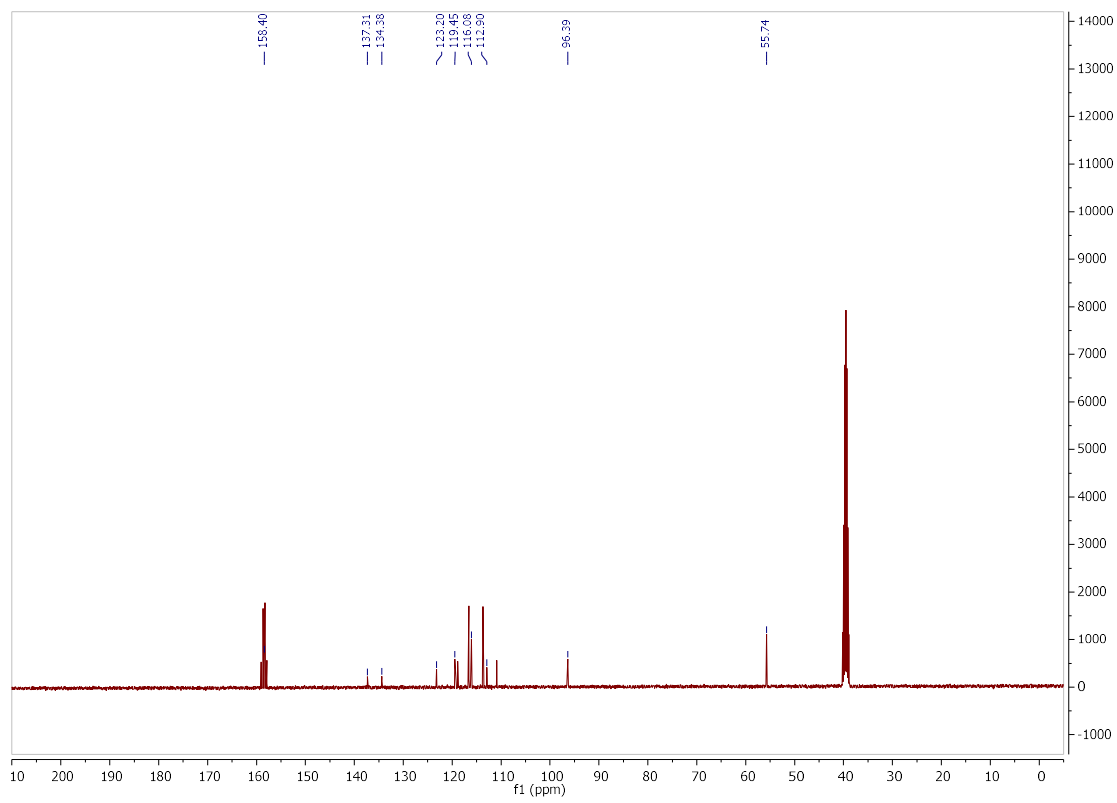

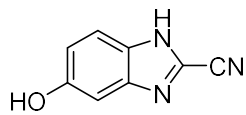

Compound 16

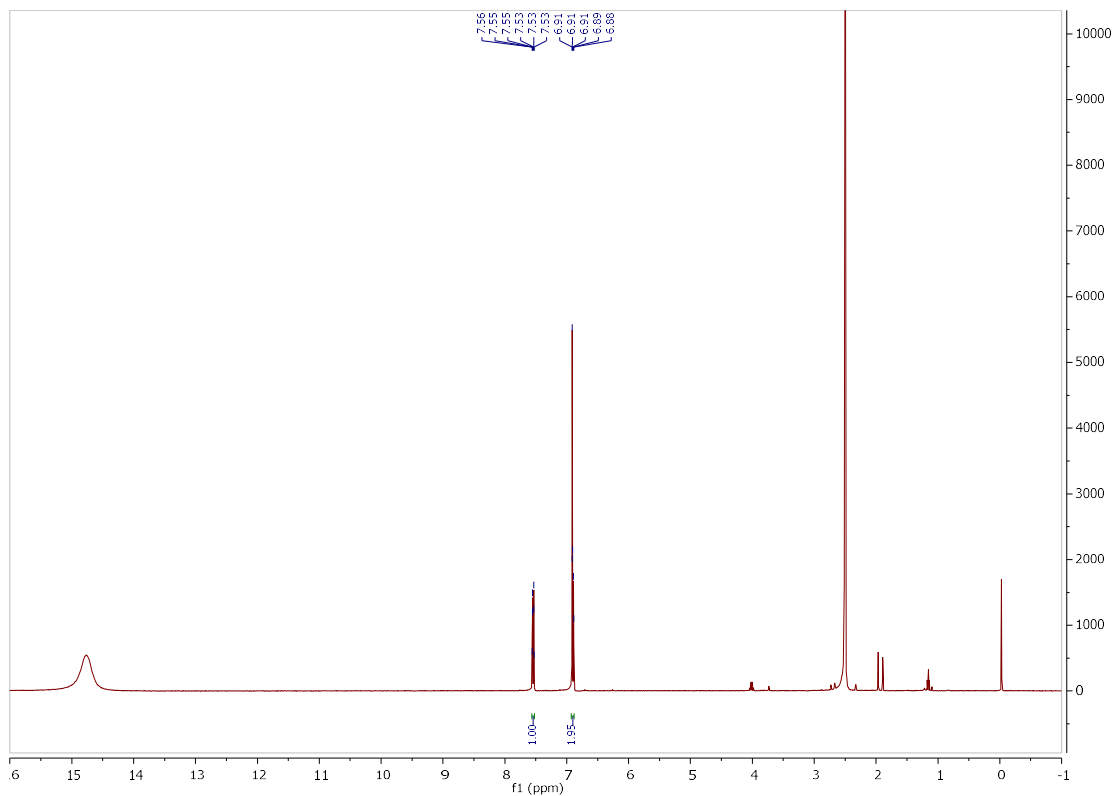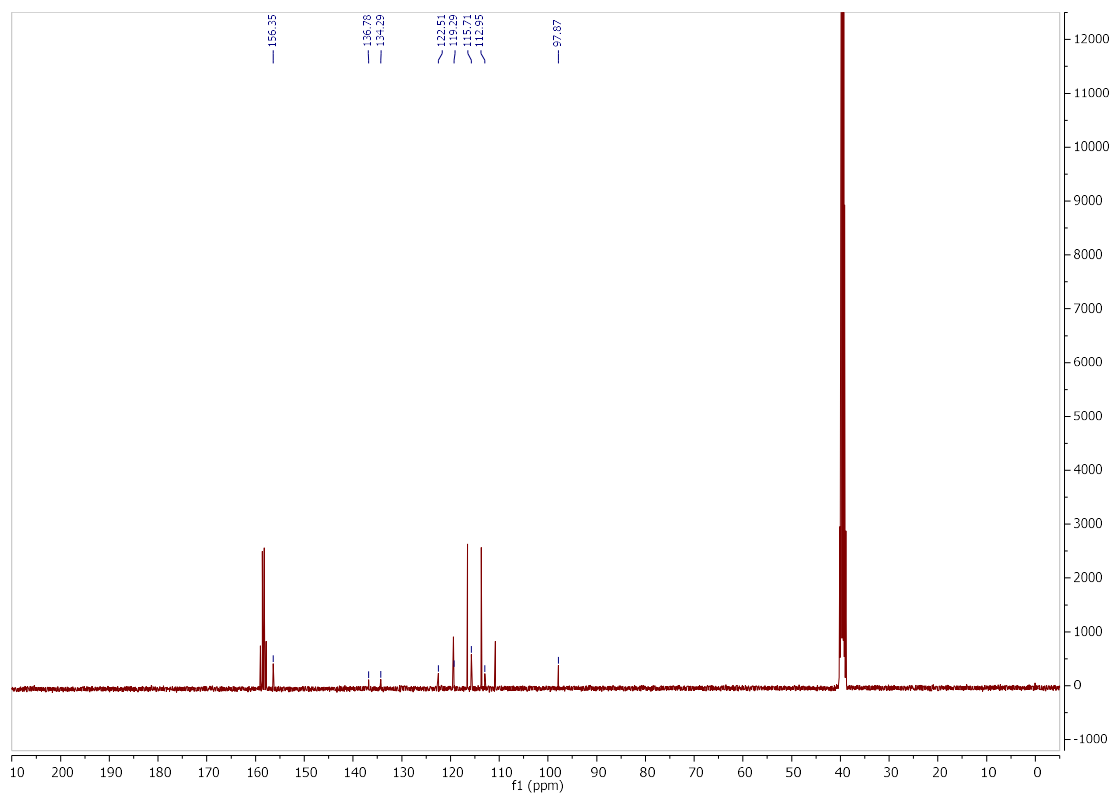

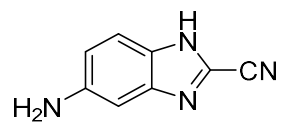

**Compound 17**

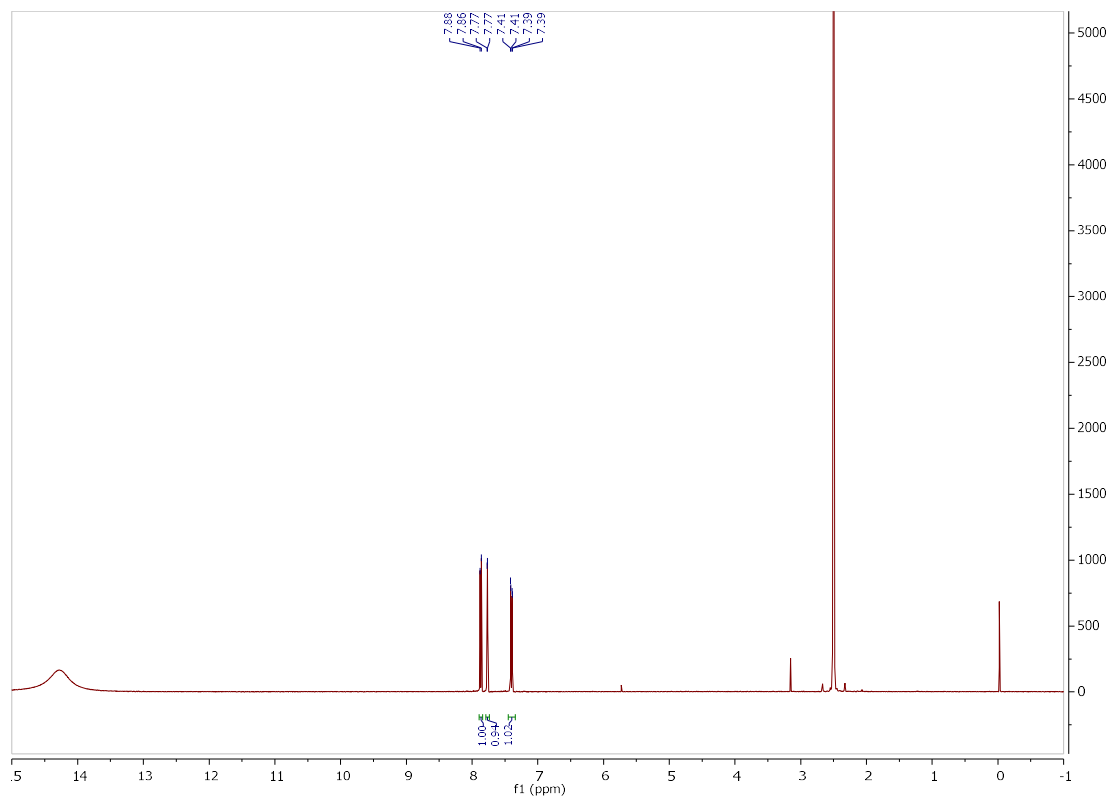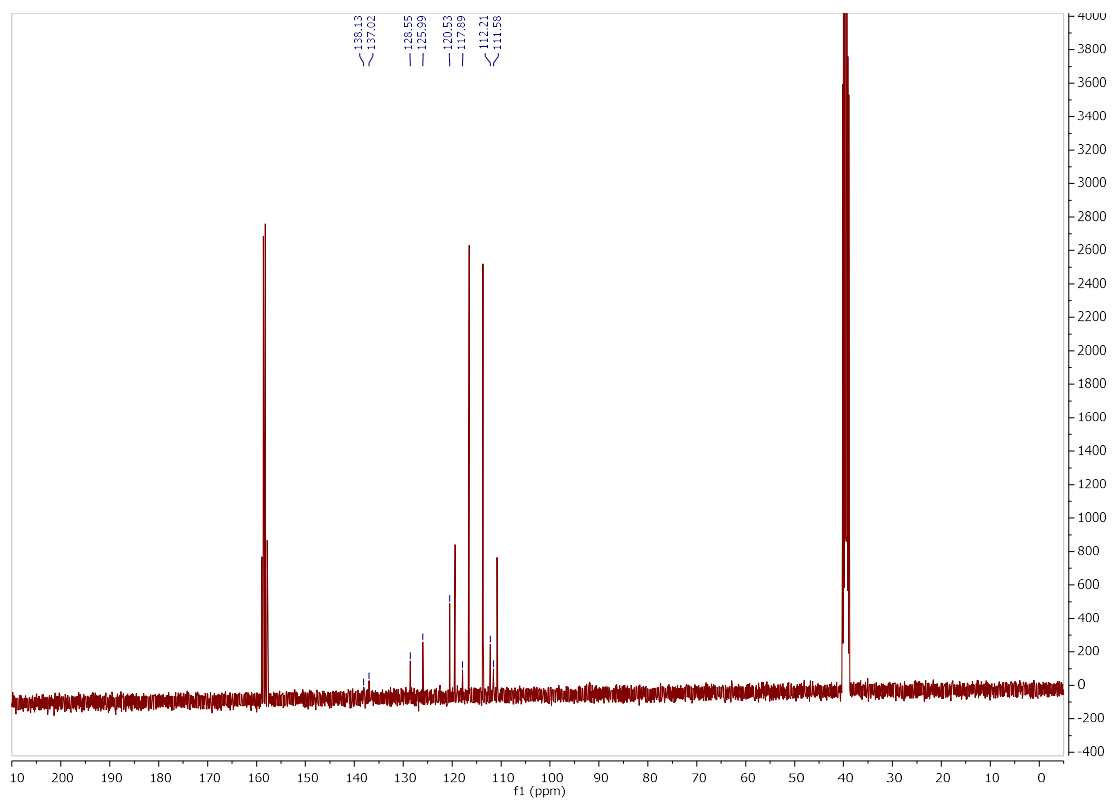



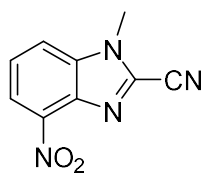

**Compound 19**

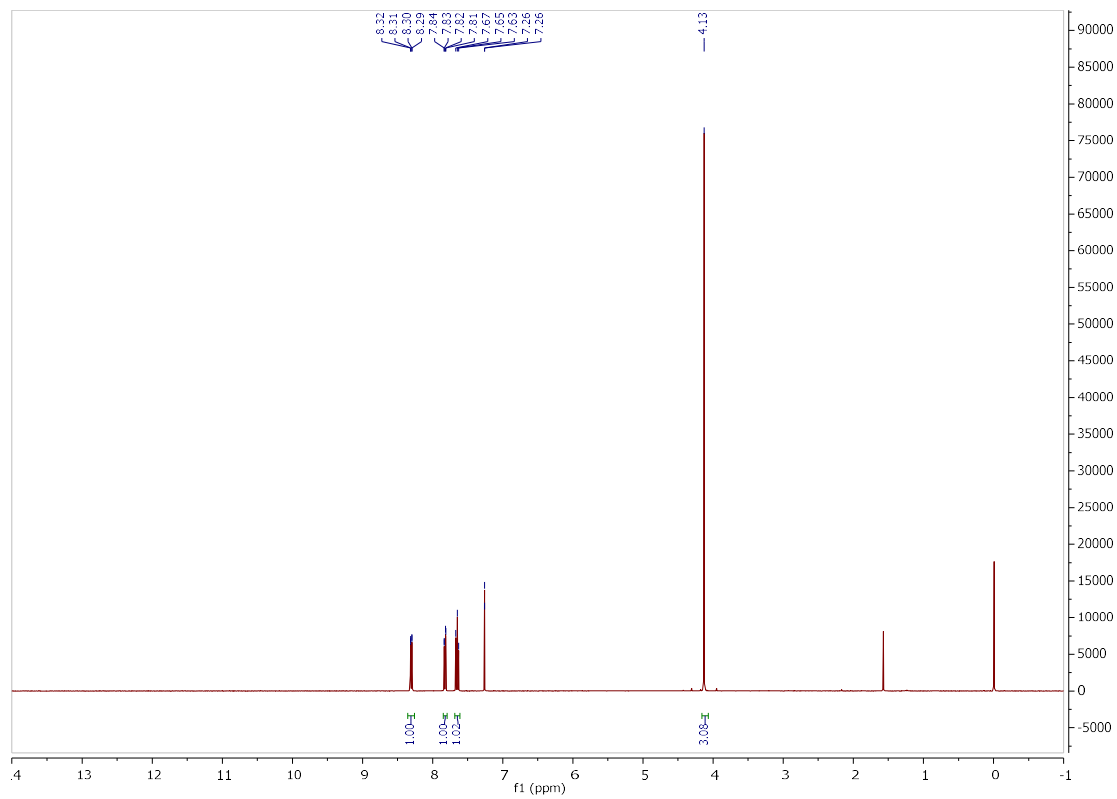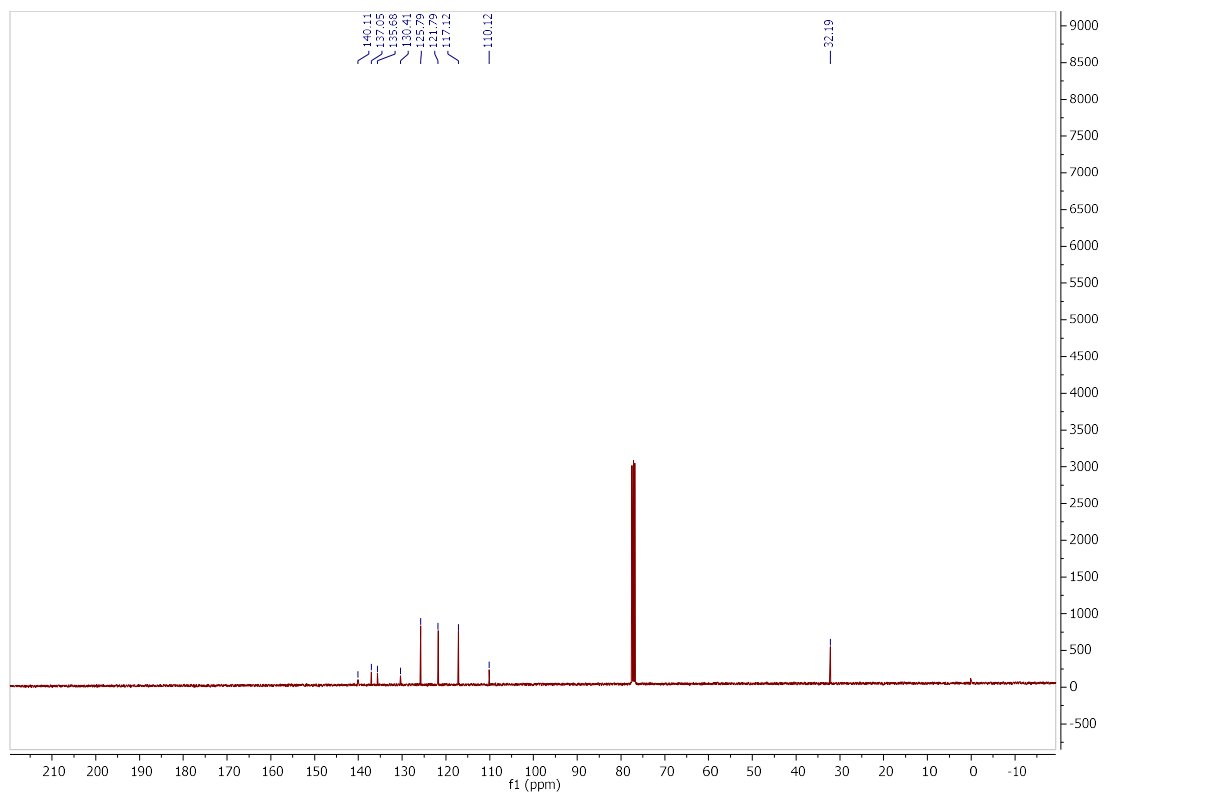

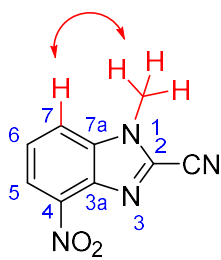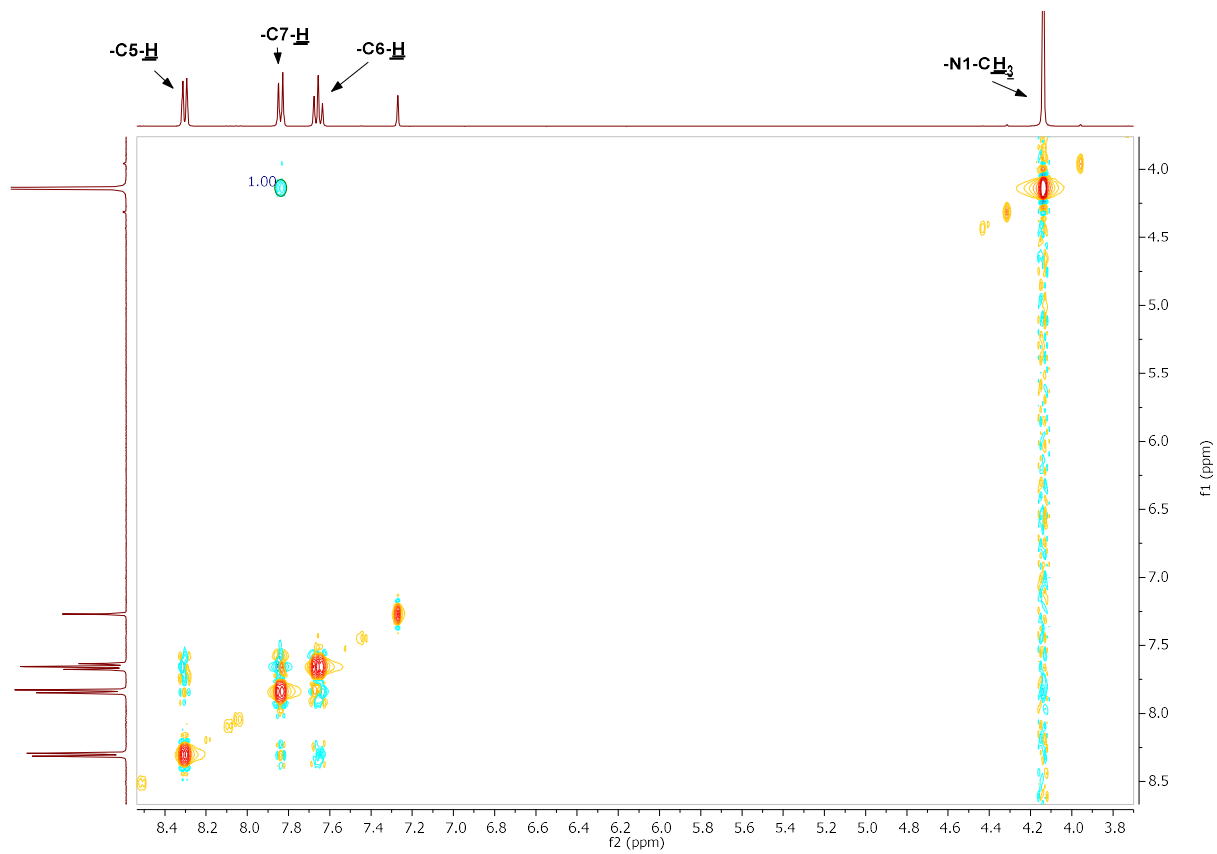

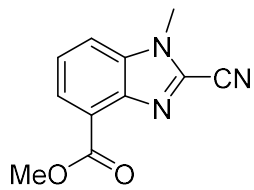

**Compound 20**

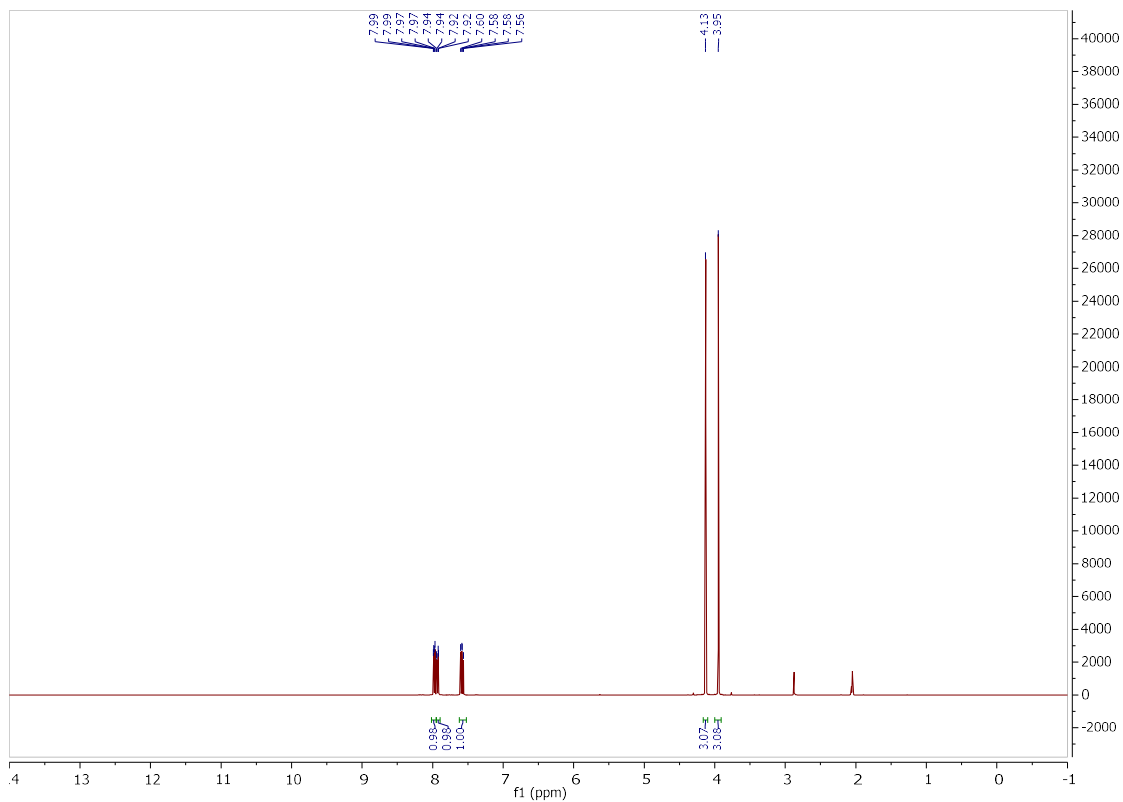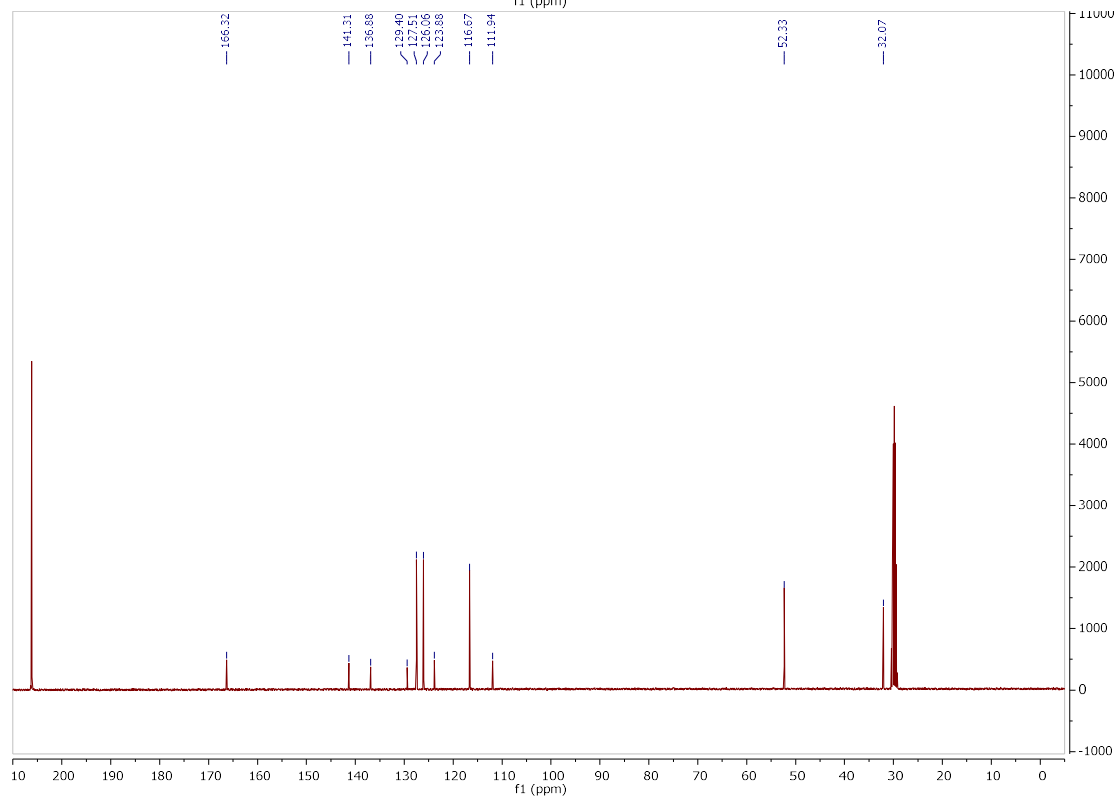

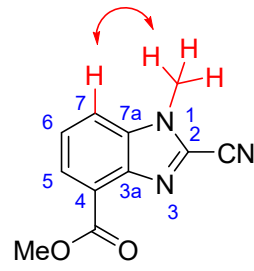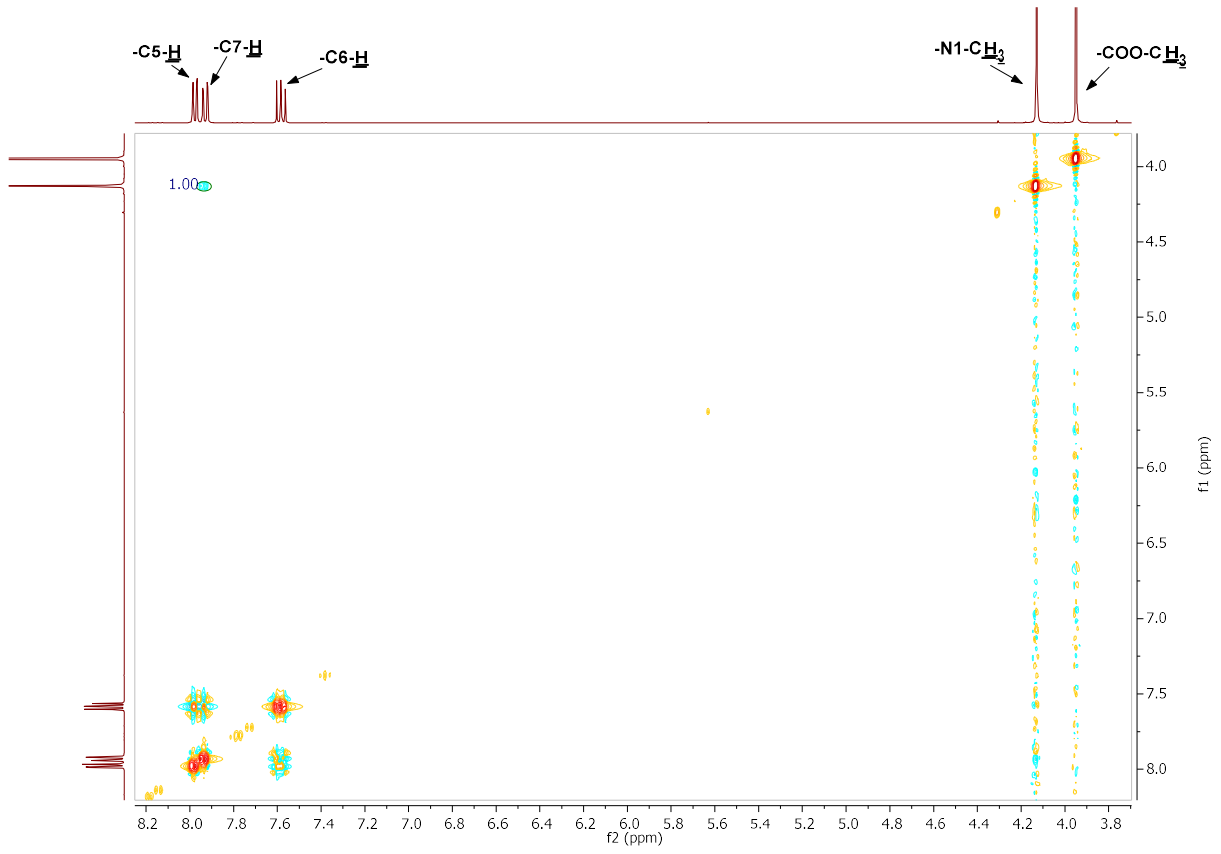

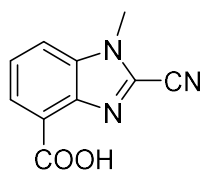

**Compound 21**

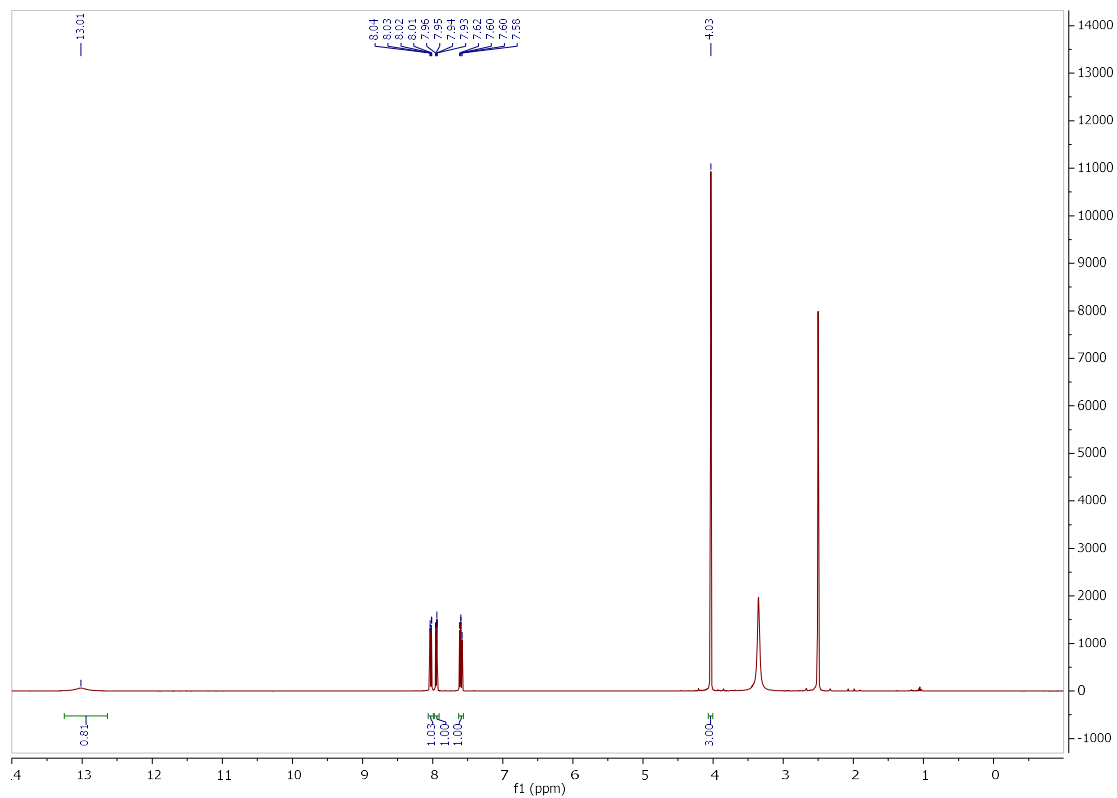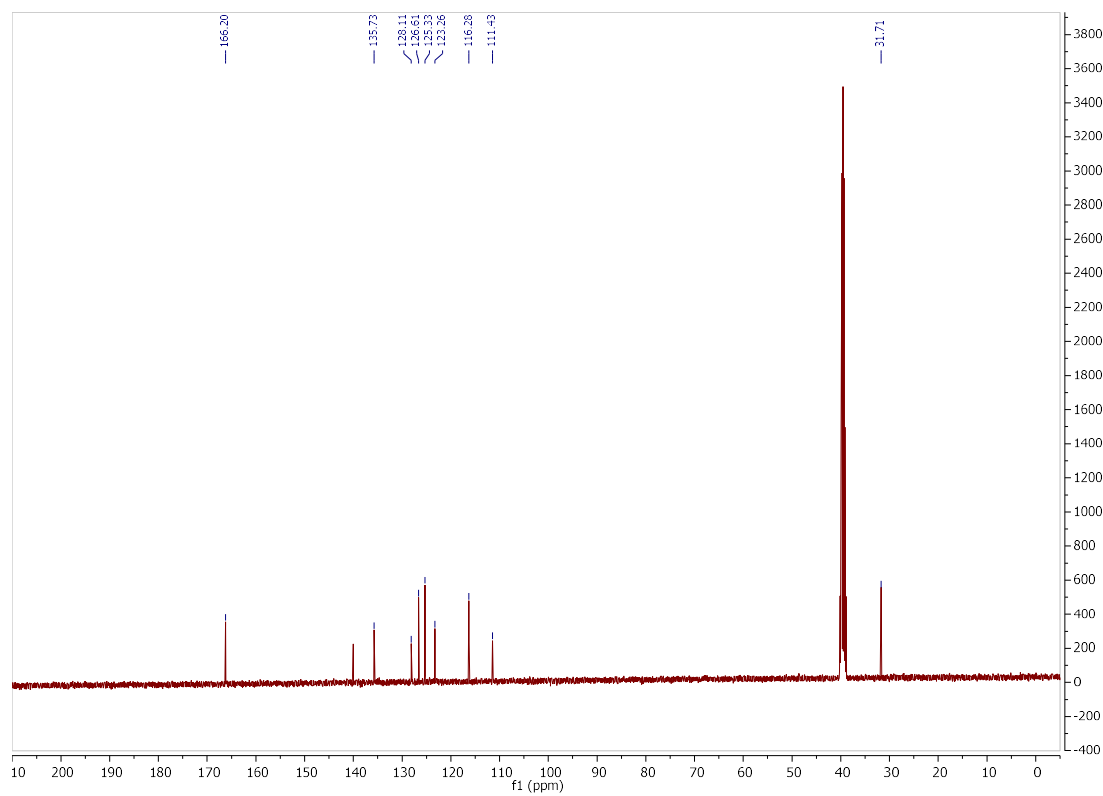

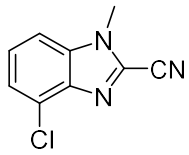

Compound 22

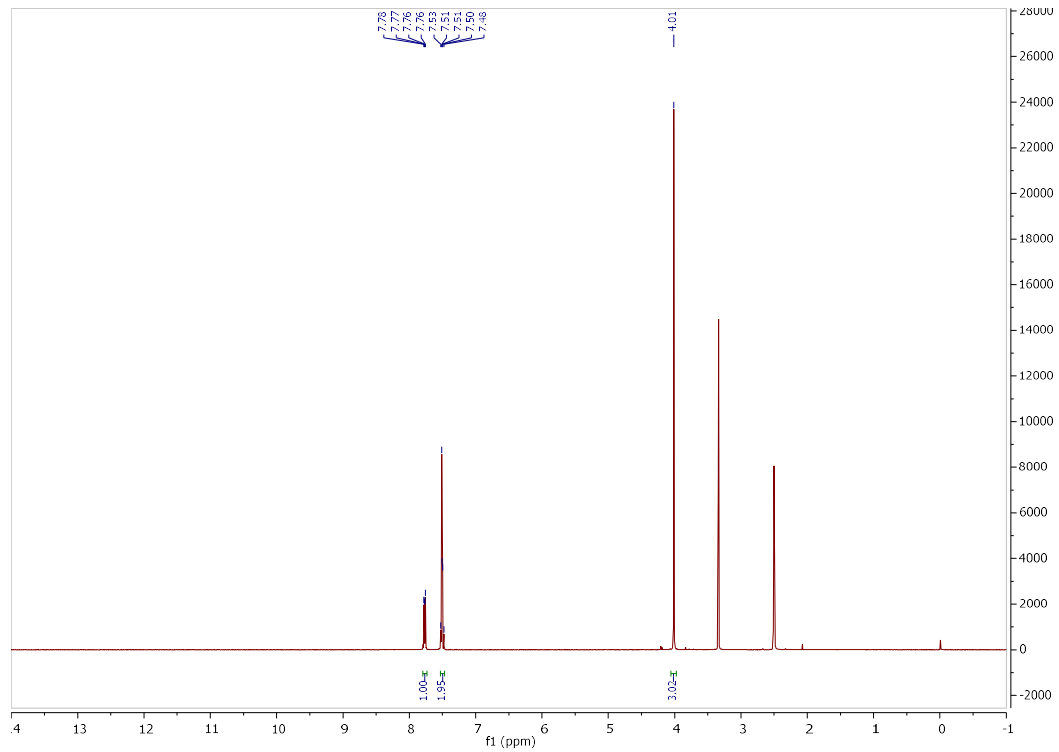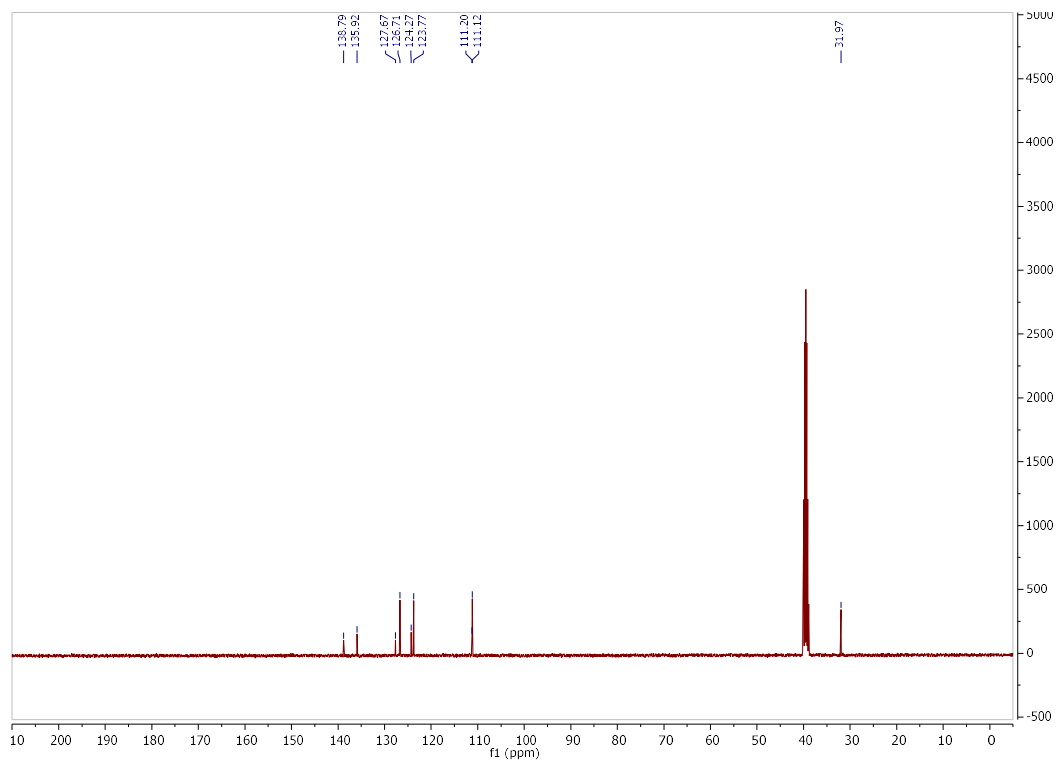

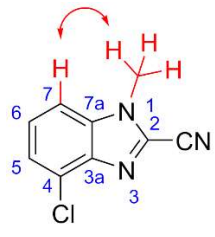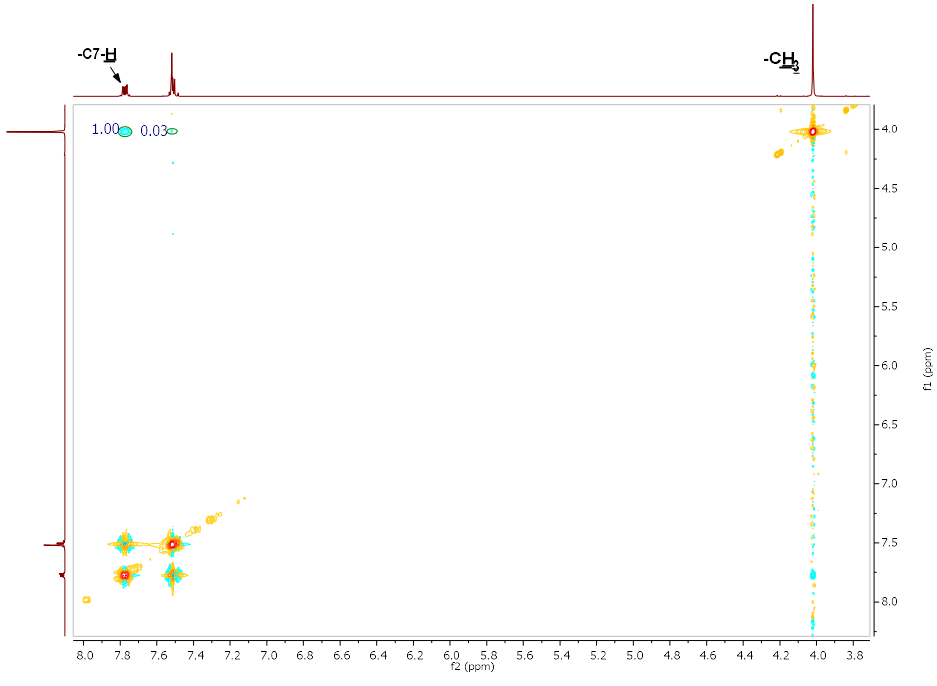

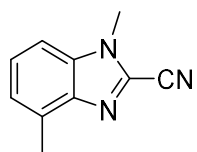

**Compound 23**

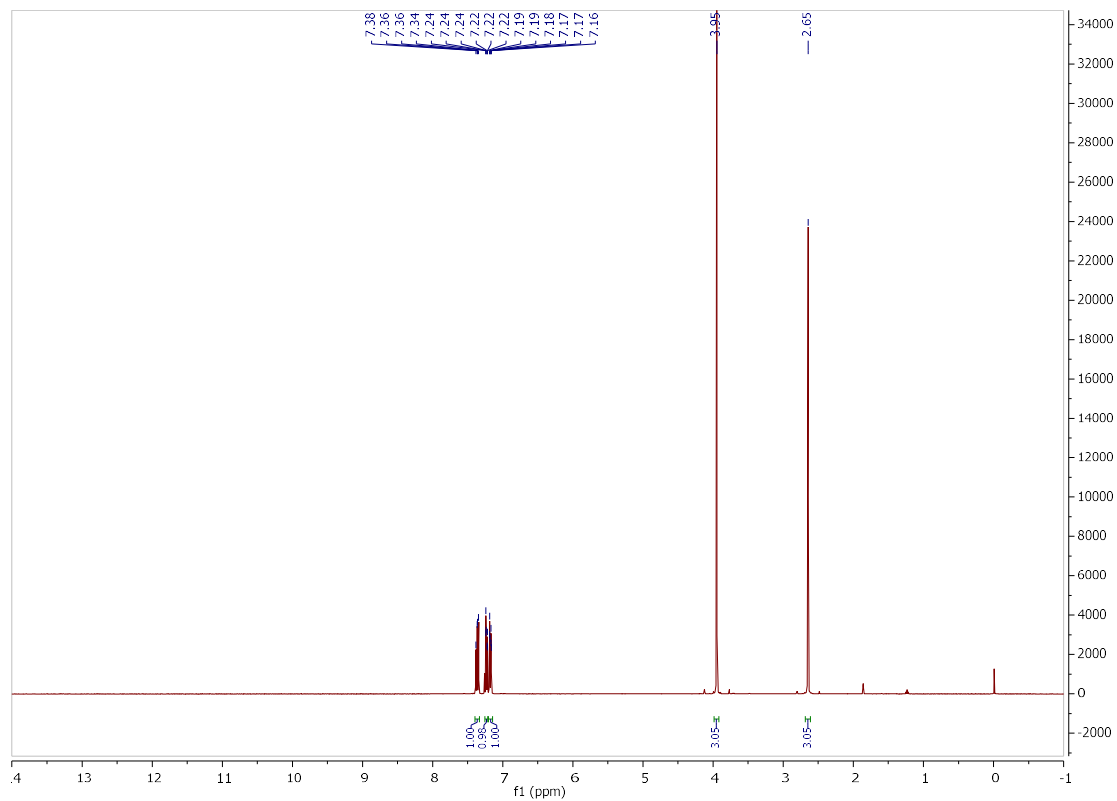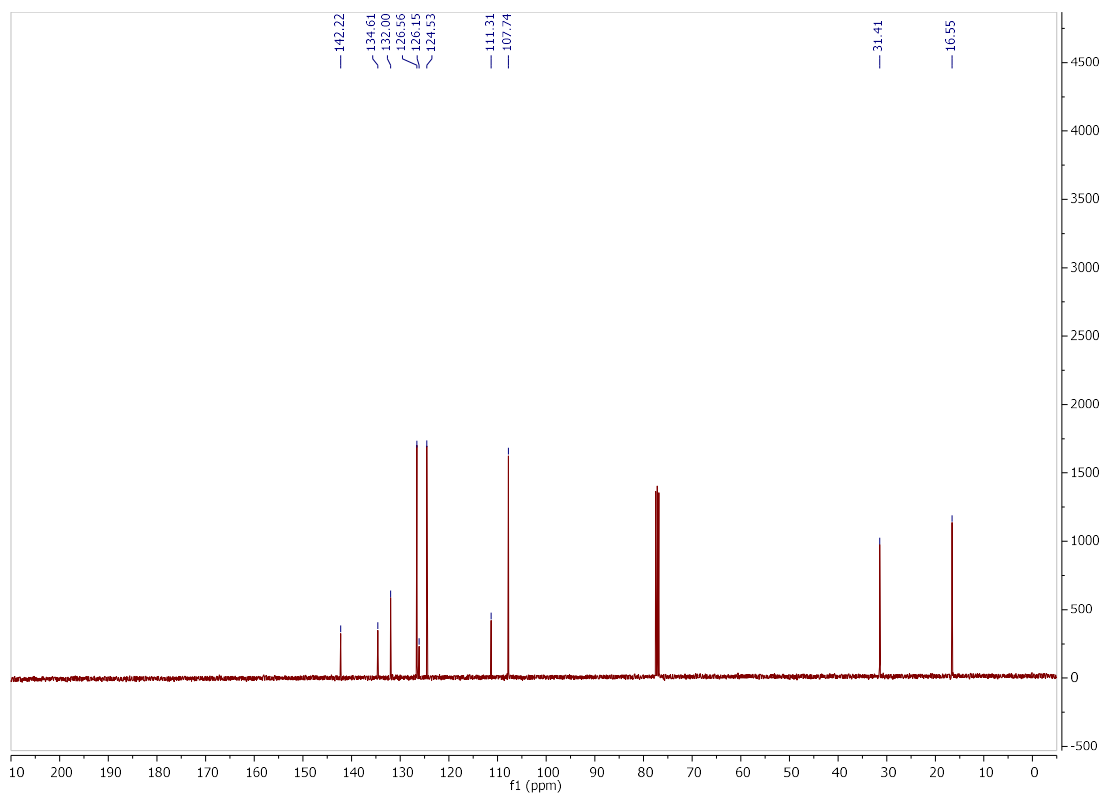



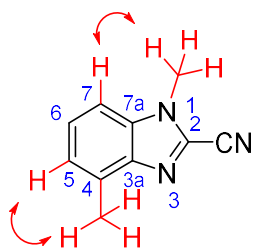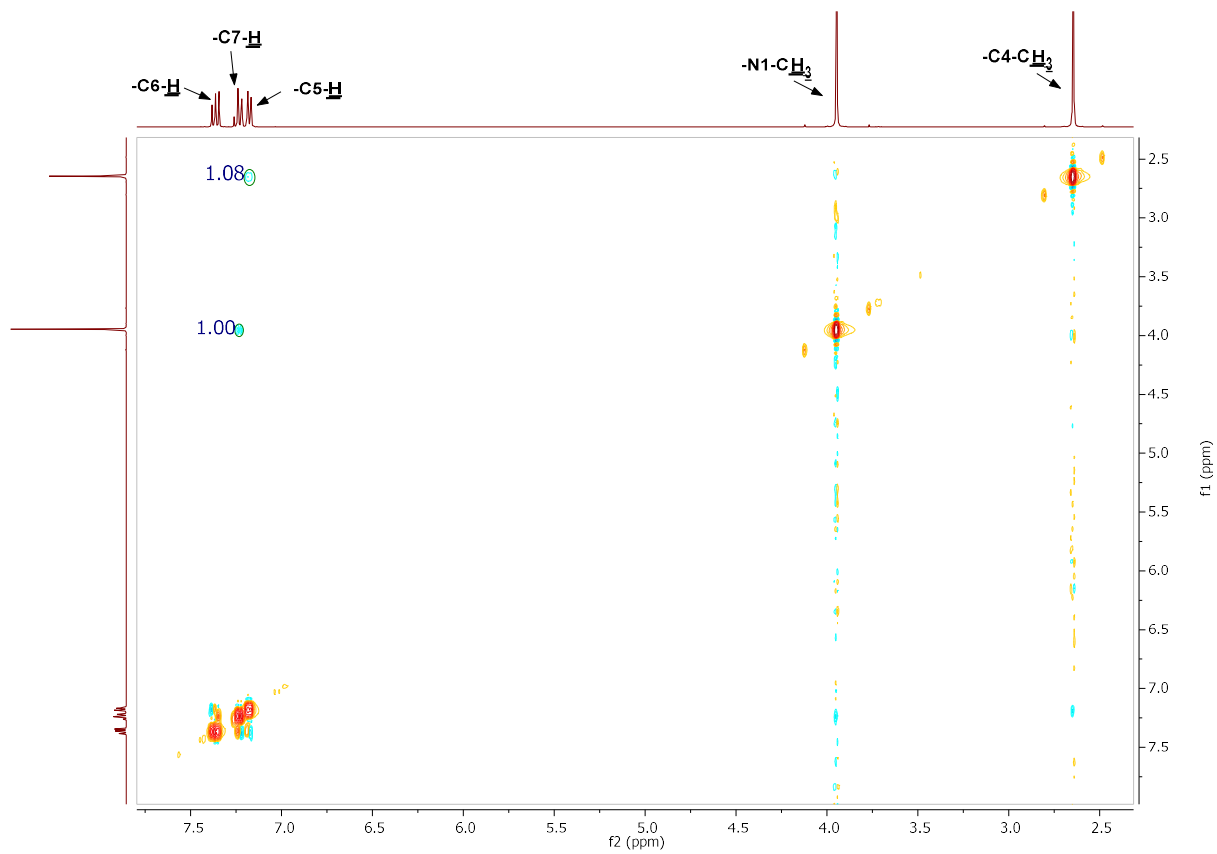

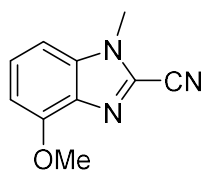

**Compound 24**

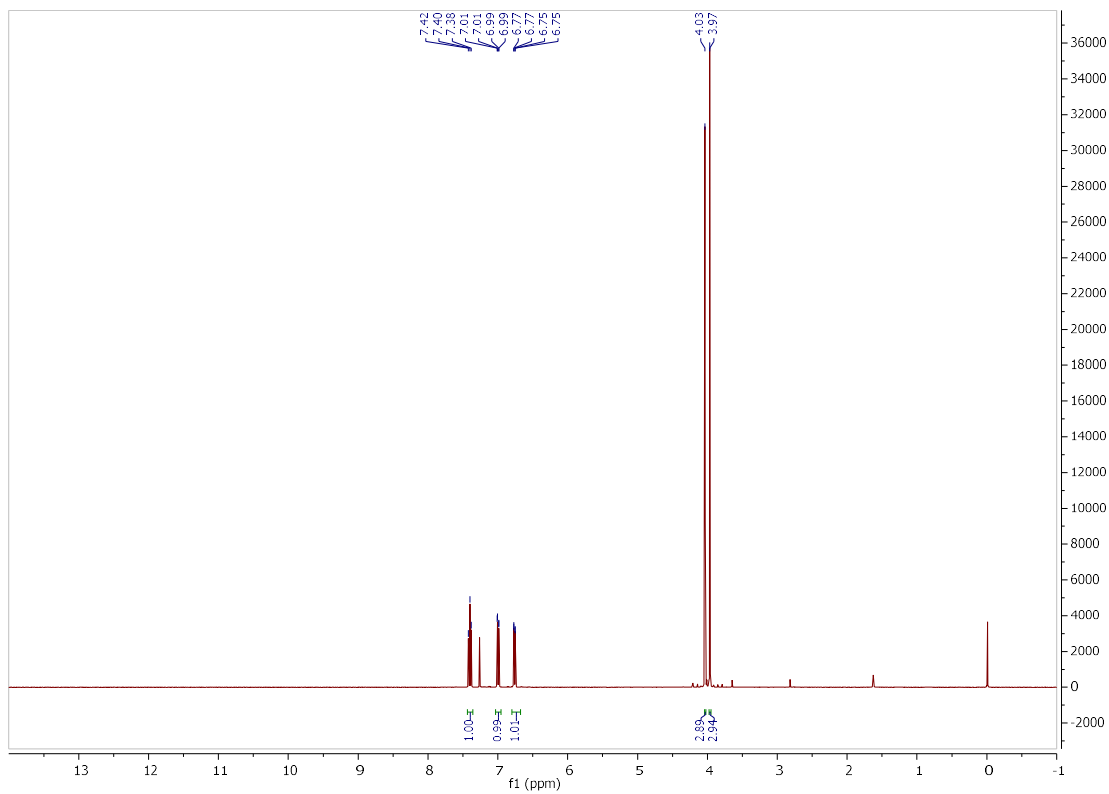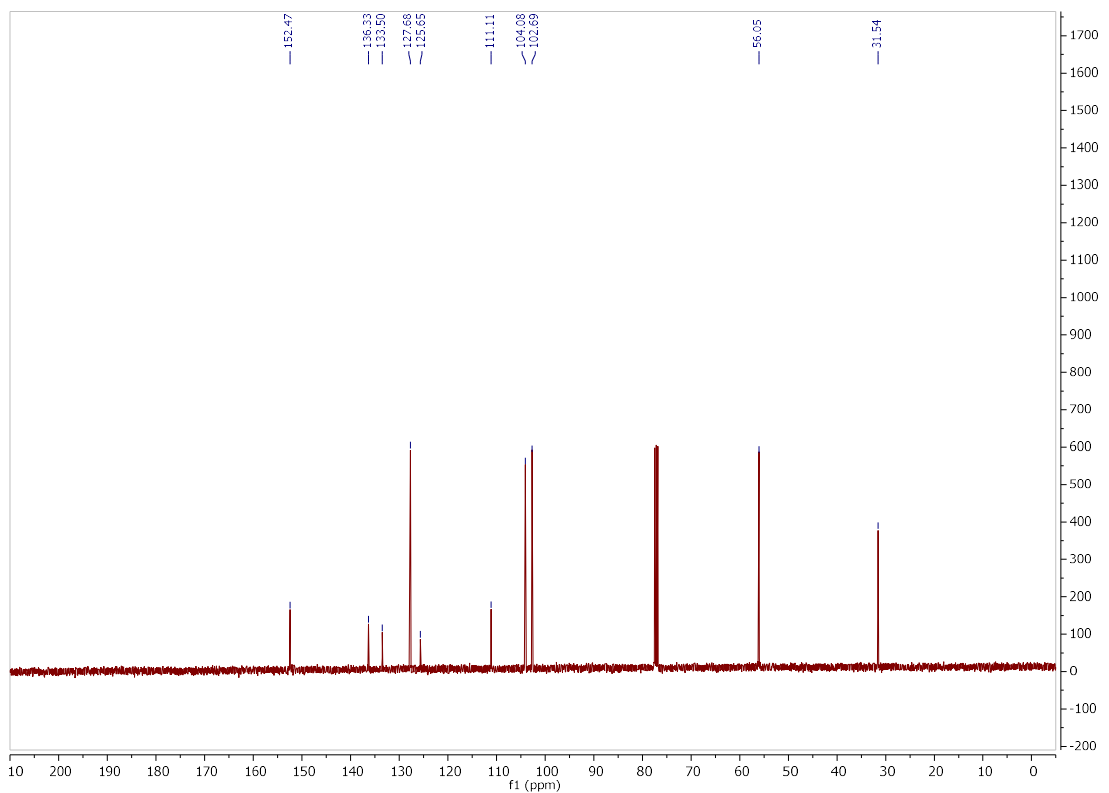

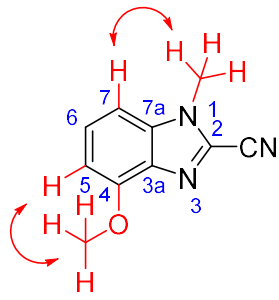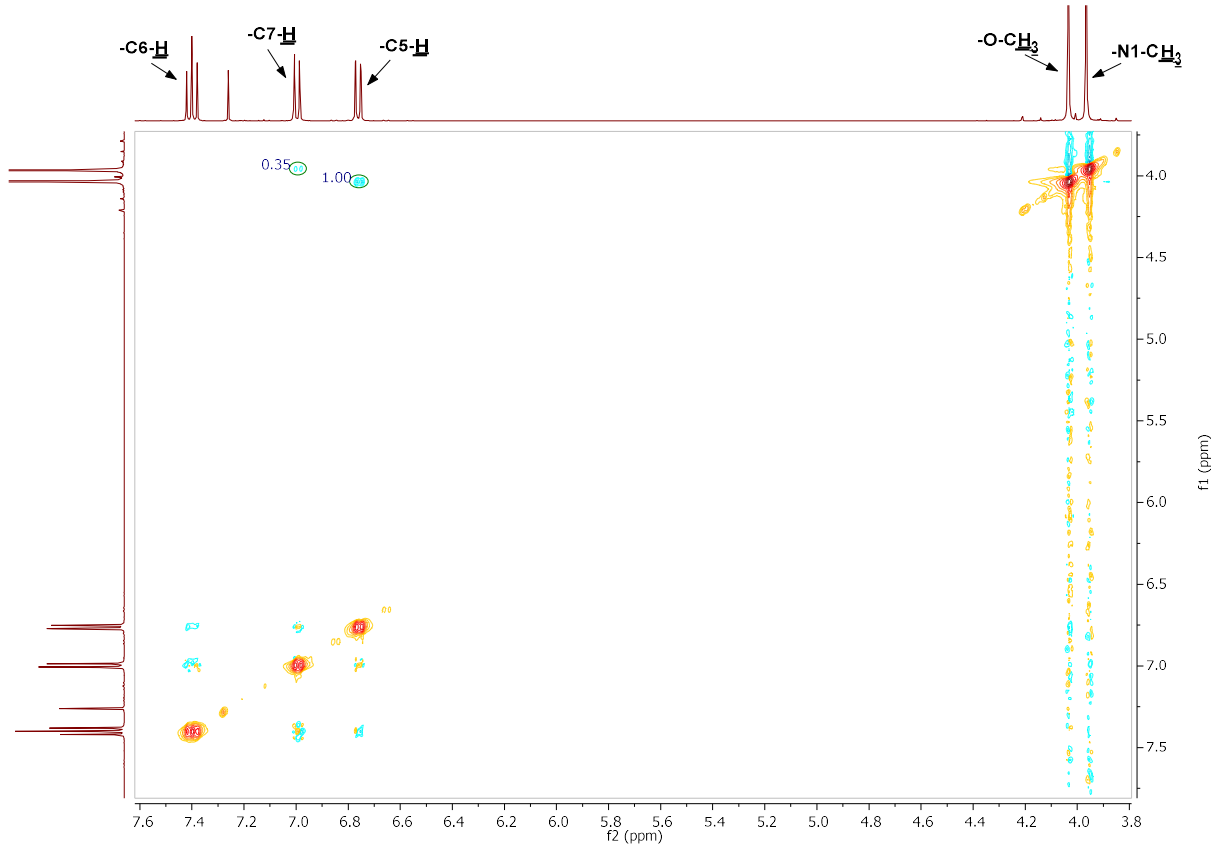

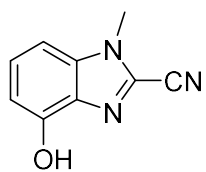

**Compound 25**

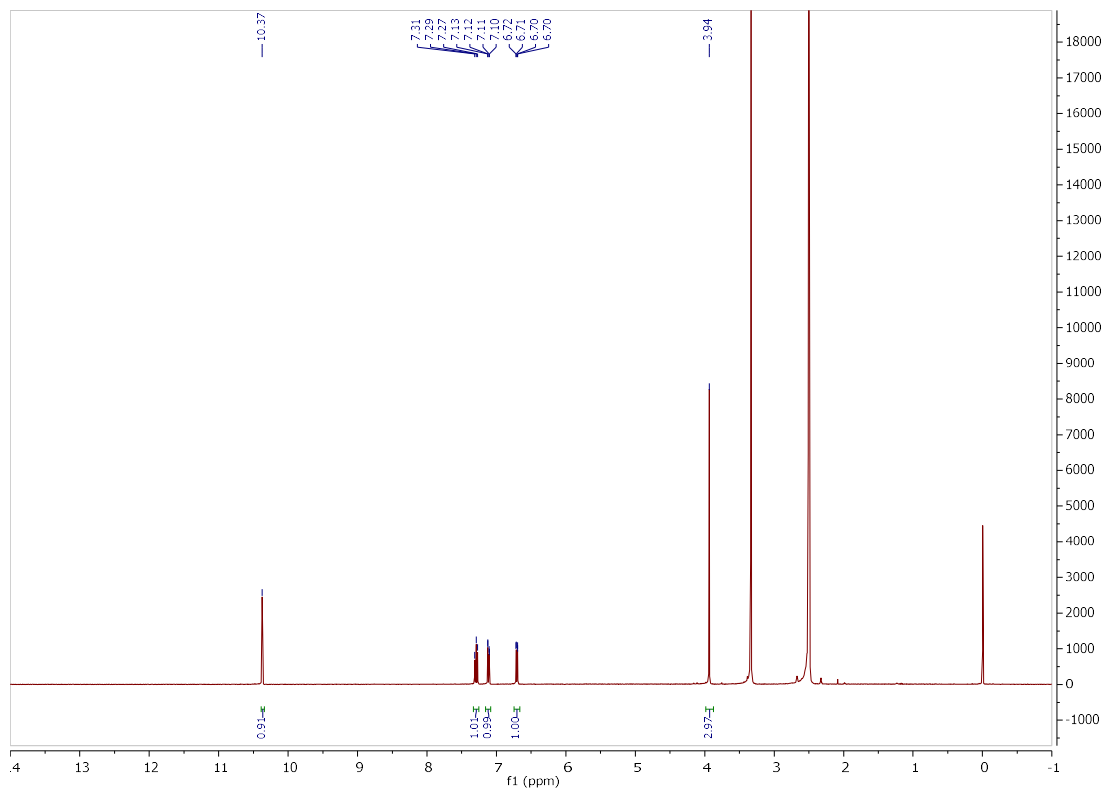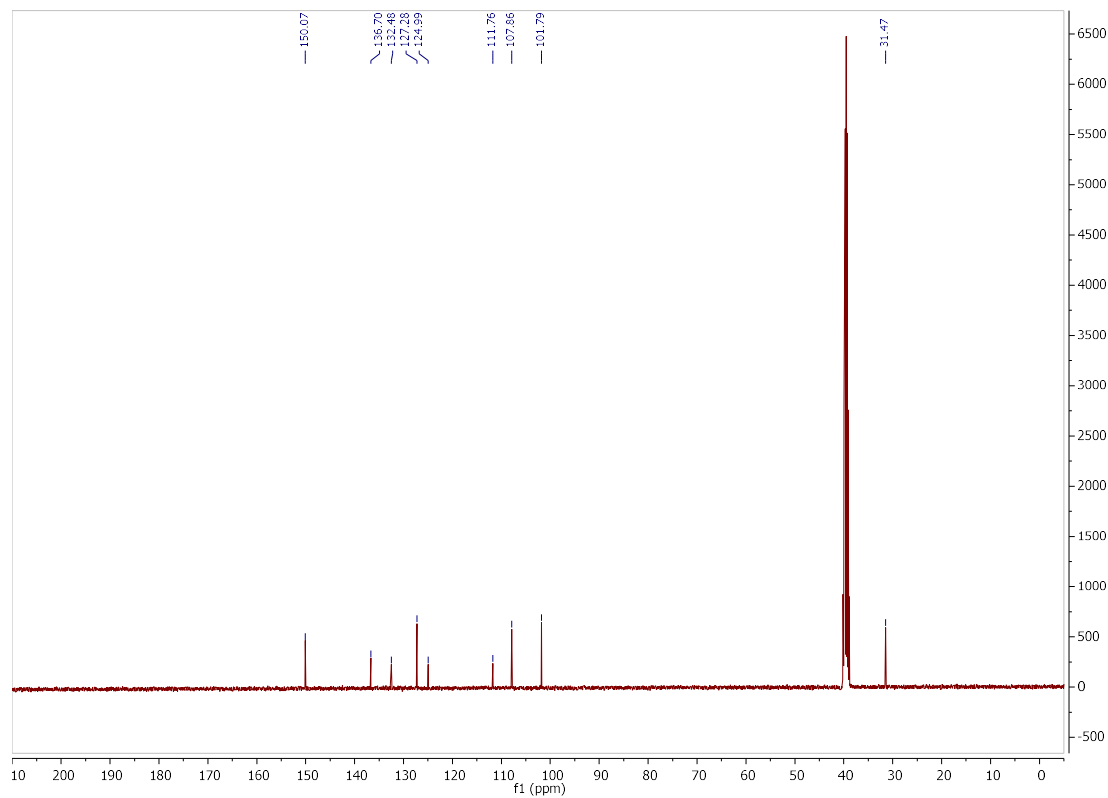

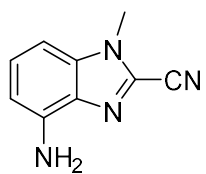

**Compound 26**

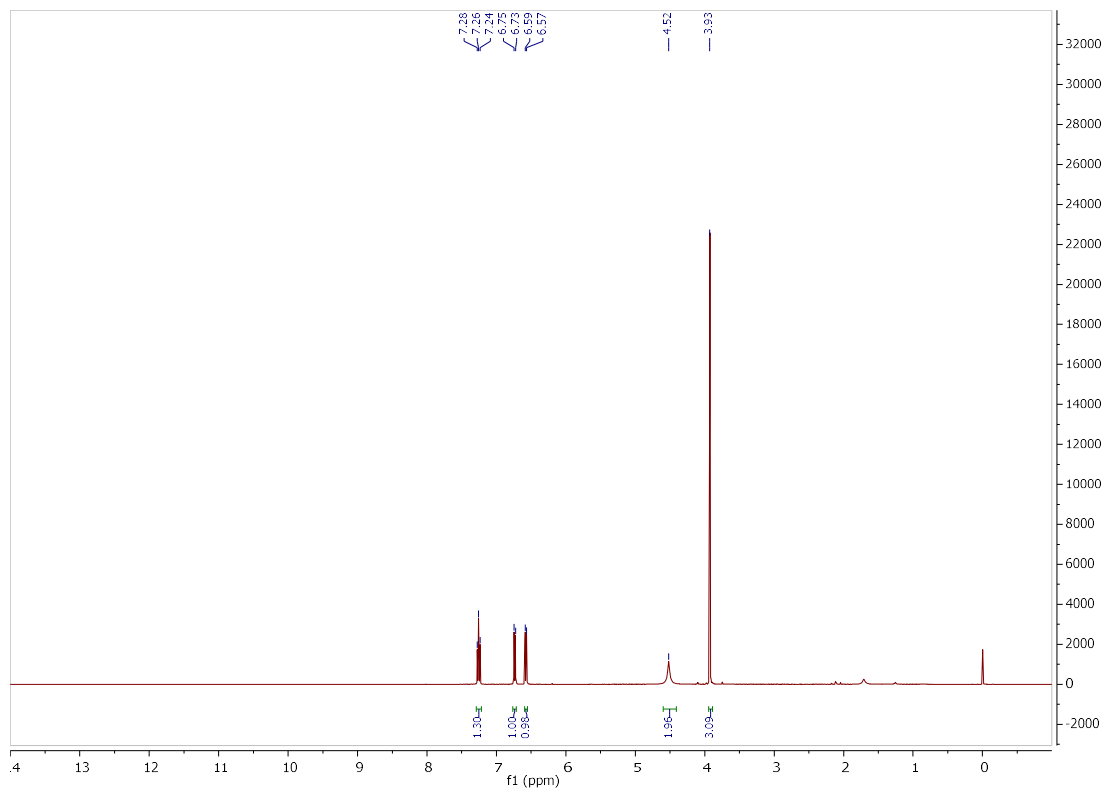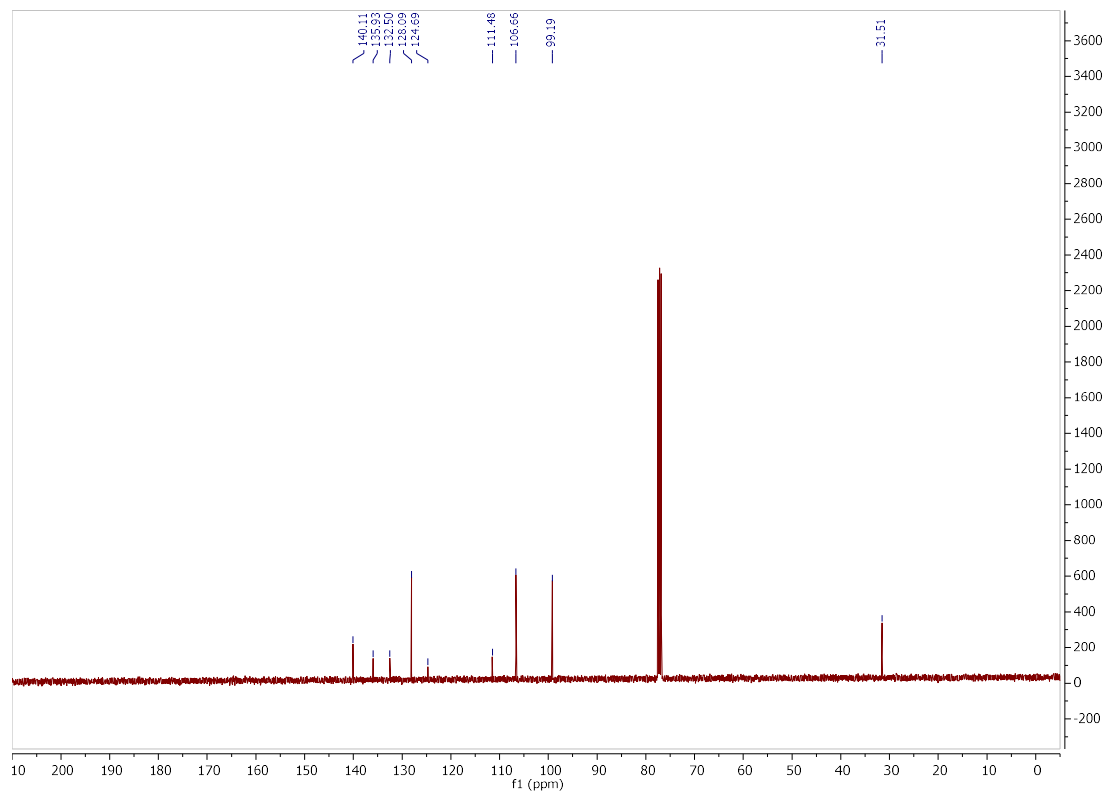

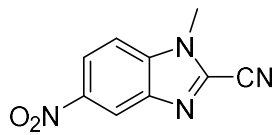

**Compound 27**

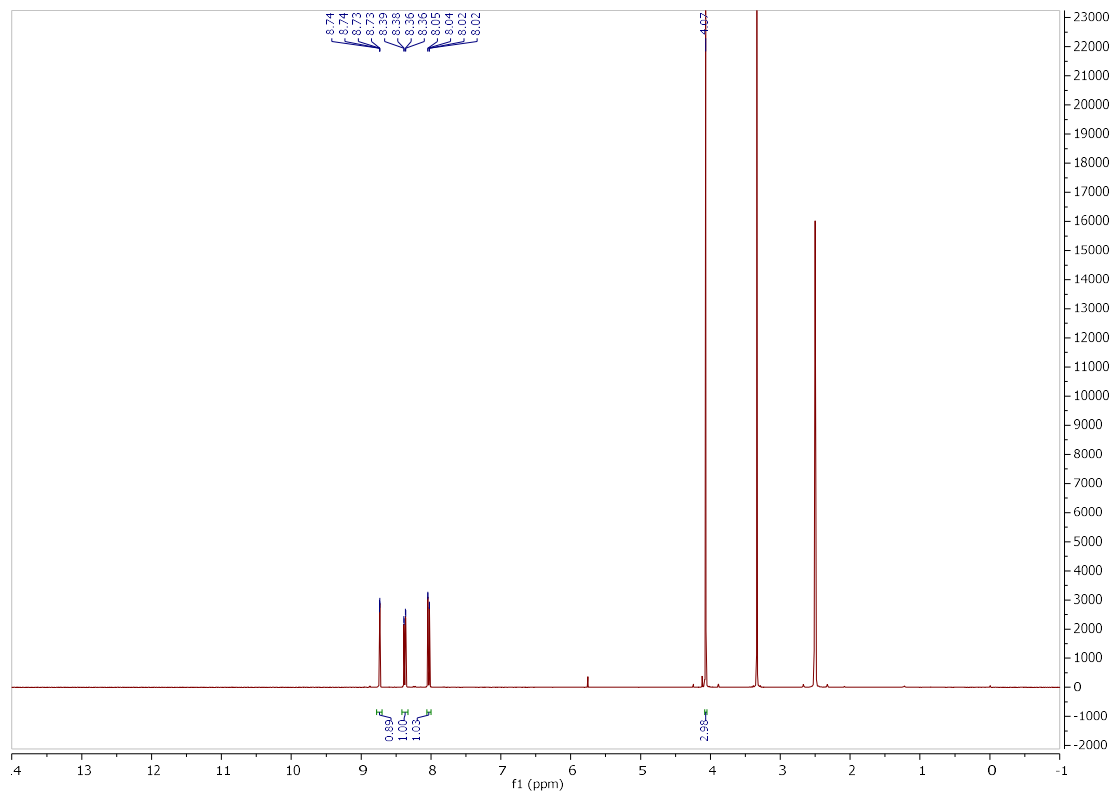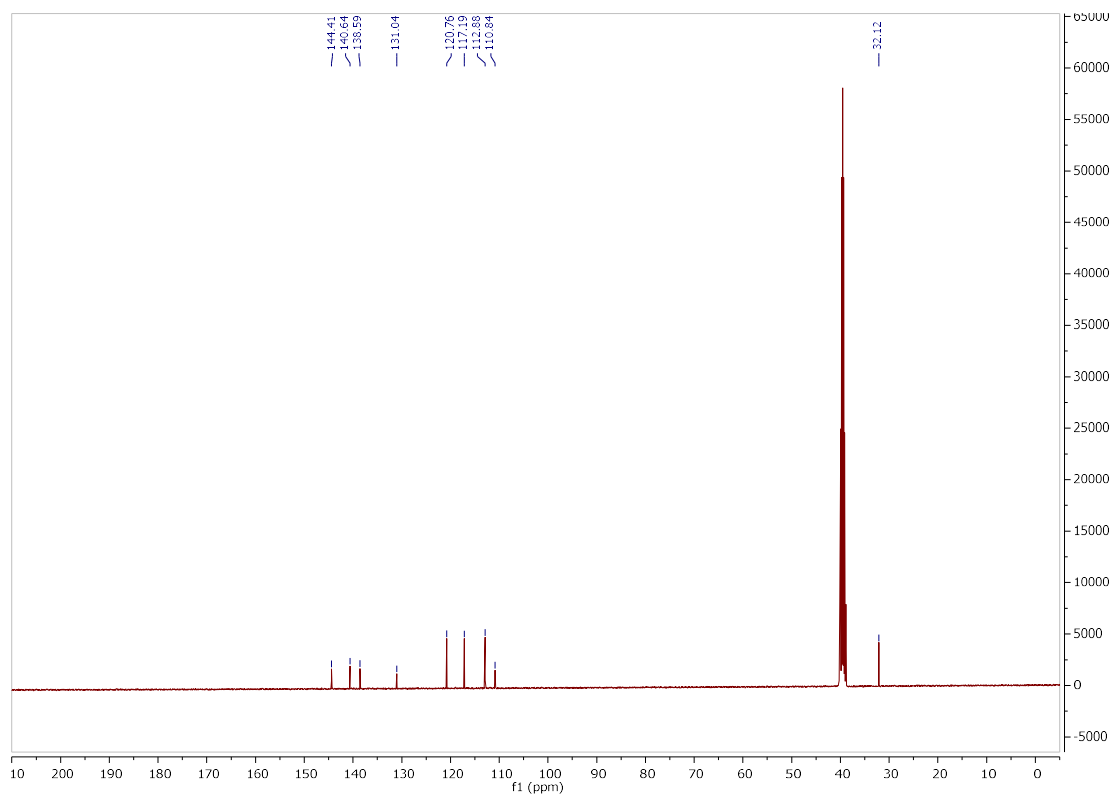

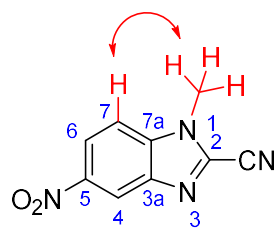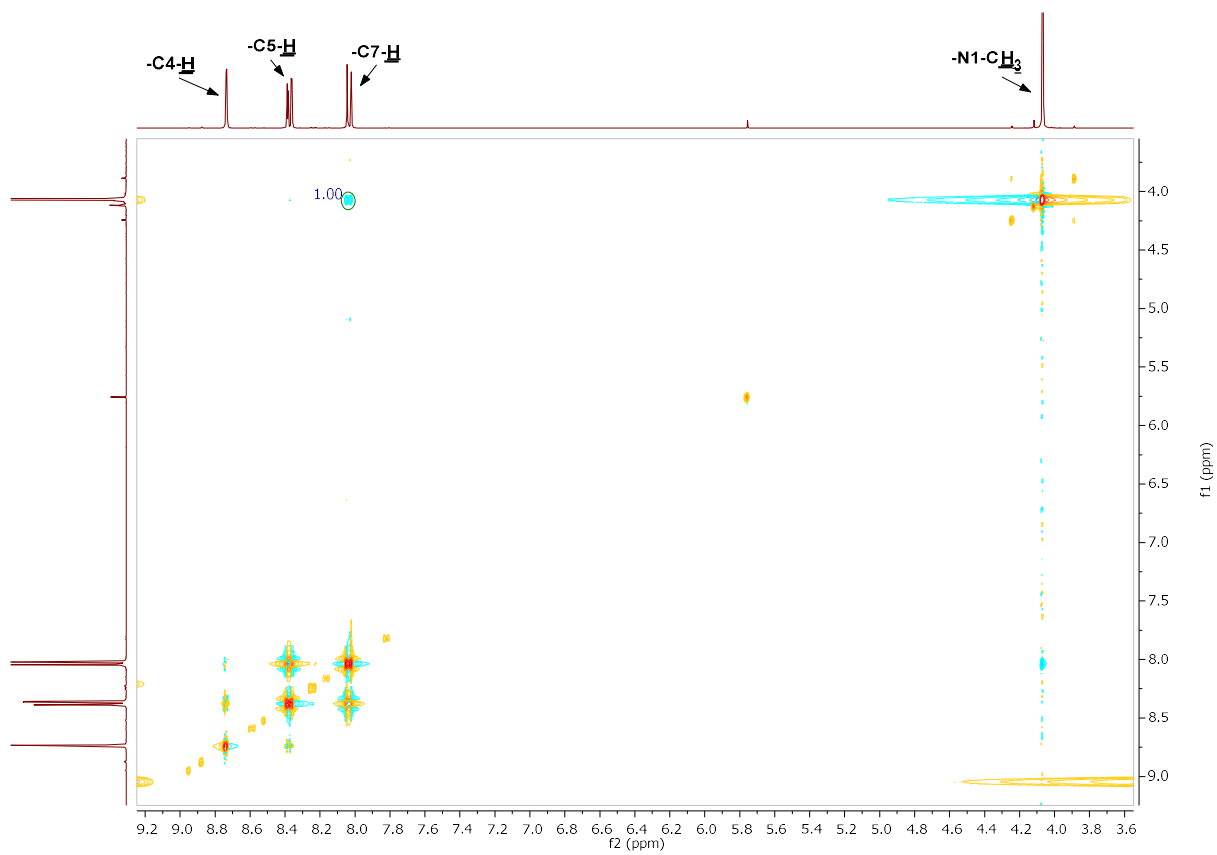

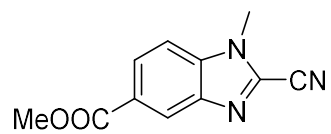

**Compound 28**

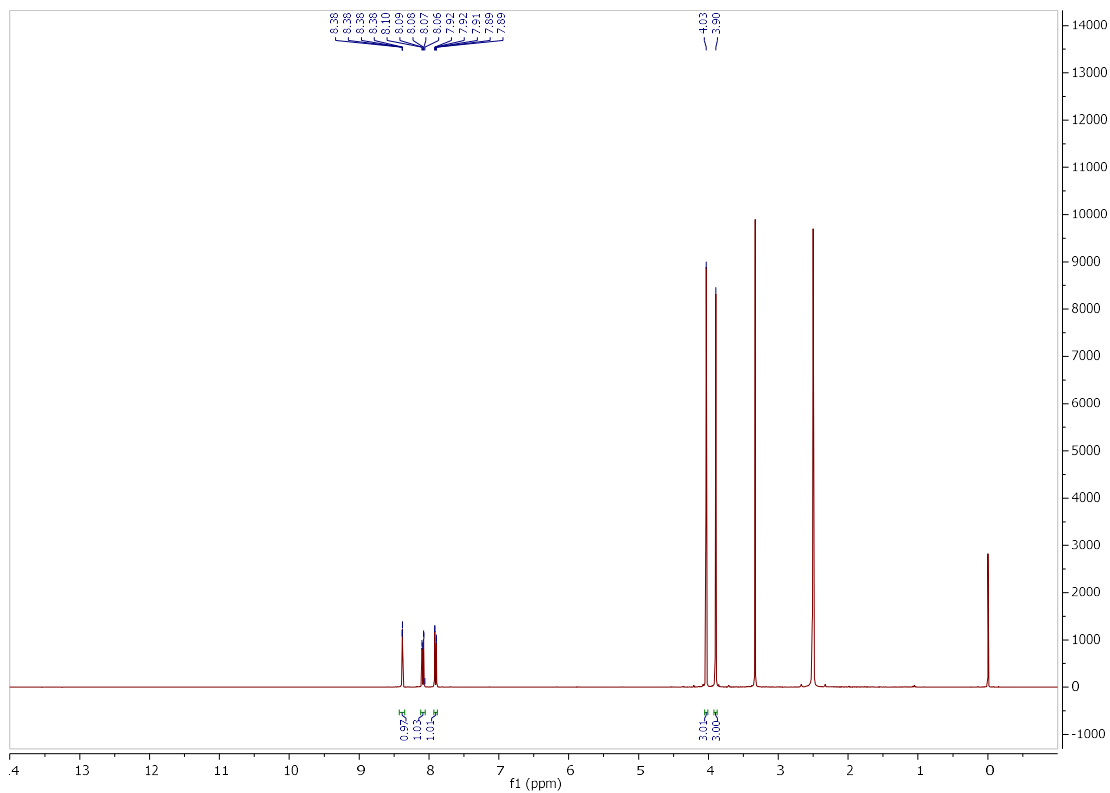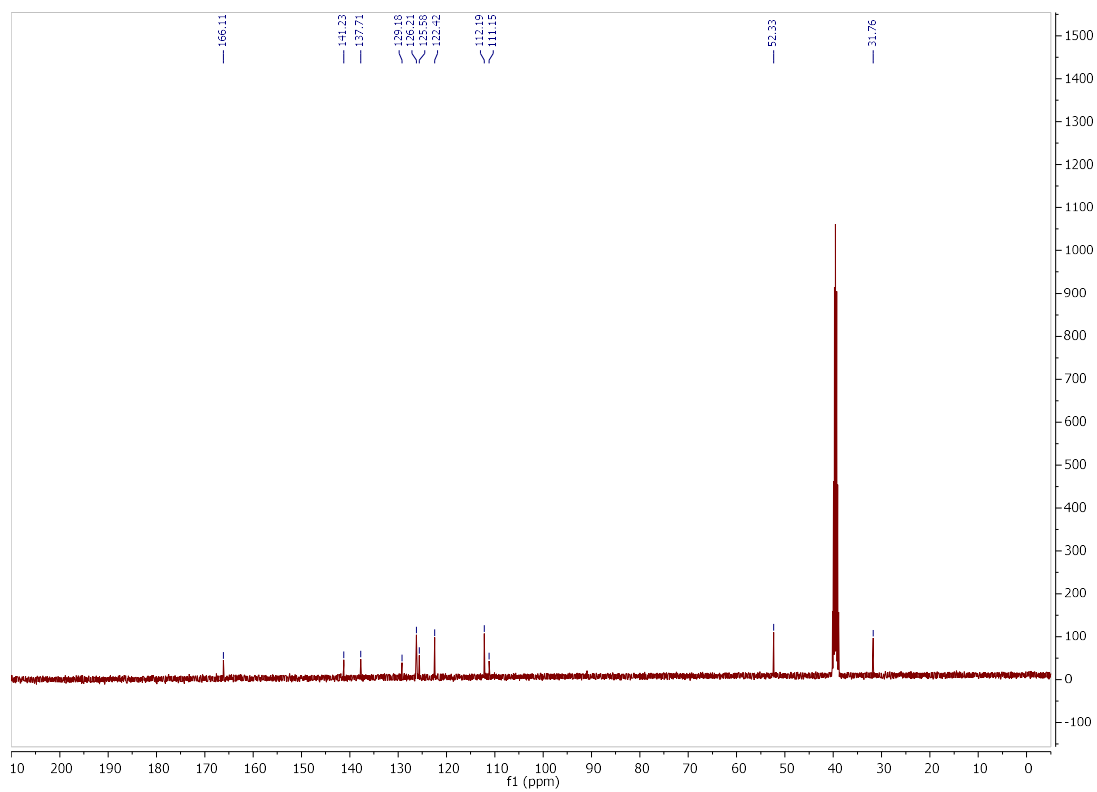



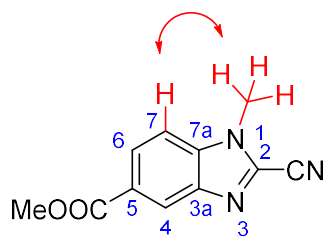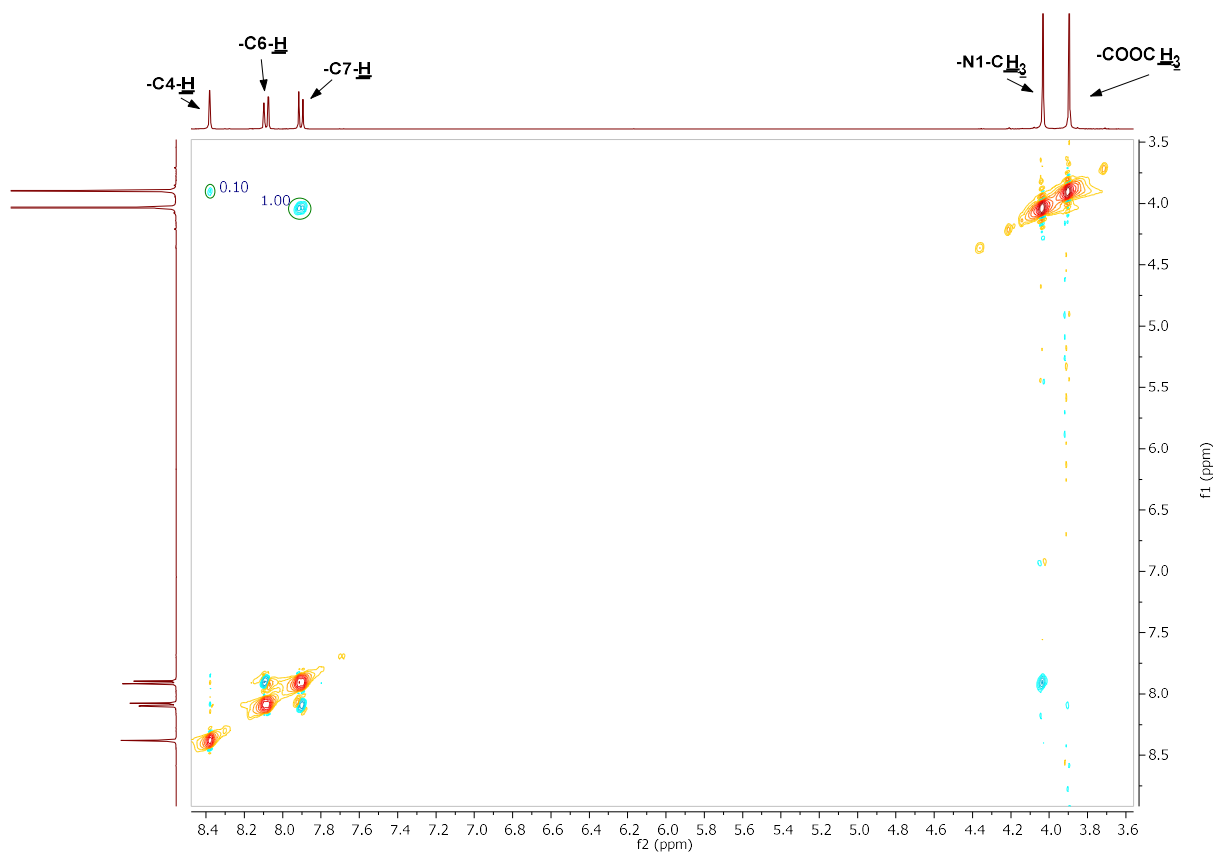

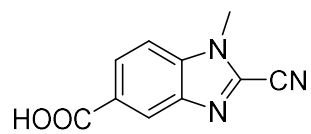

**Compound 29**

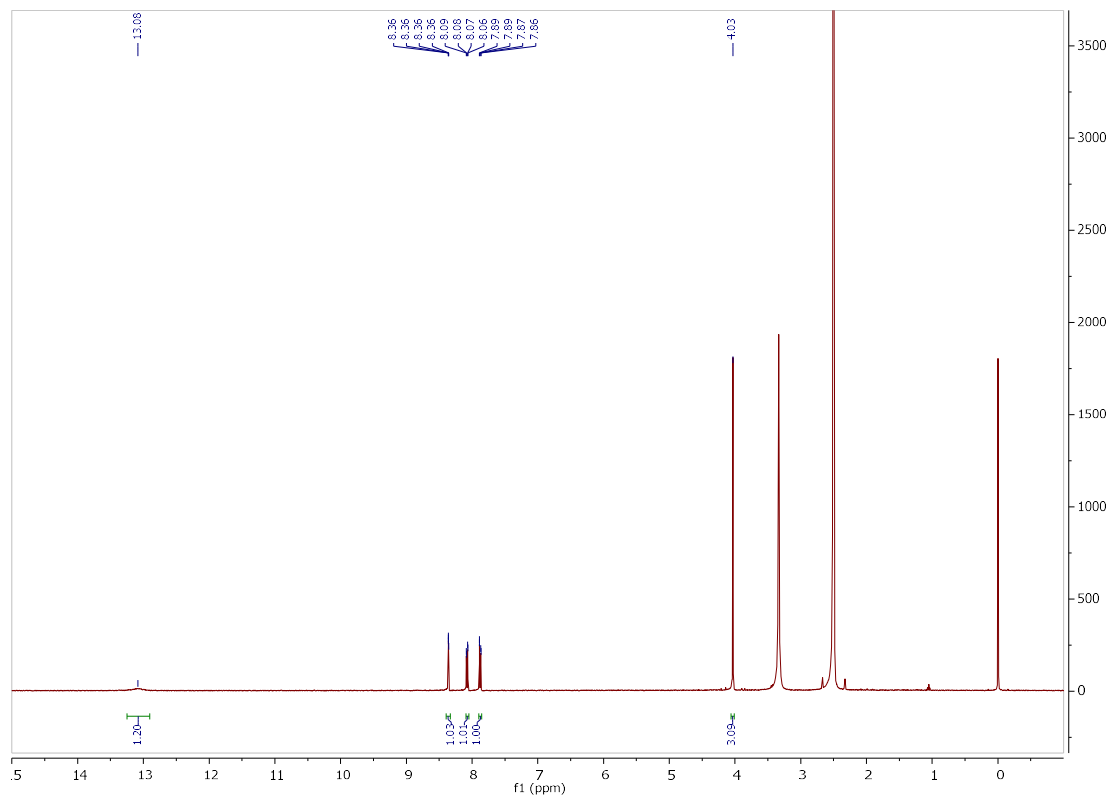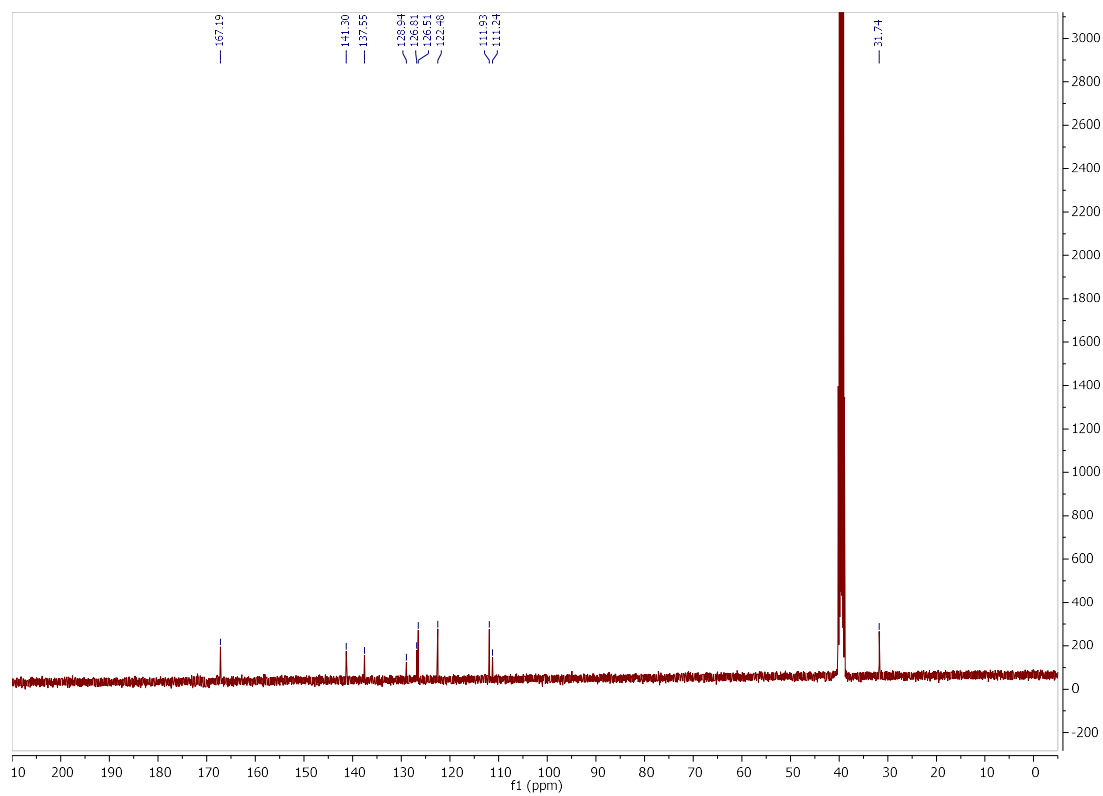

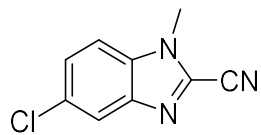

**Compound 30**

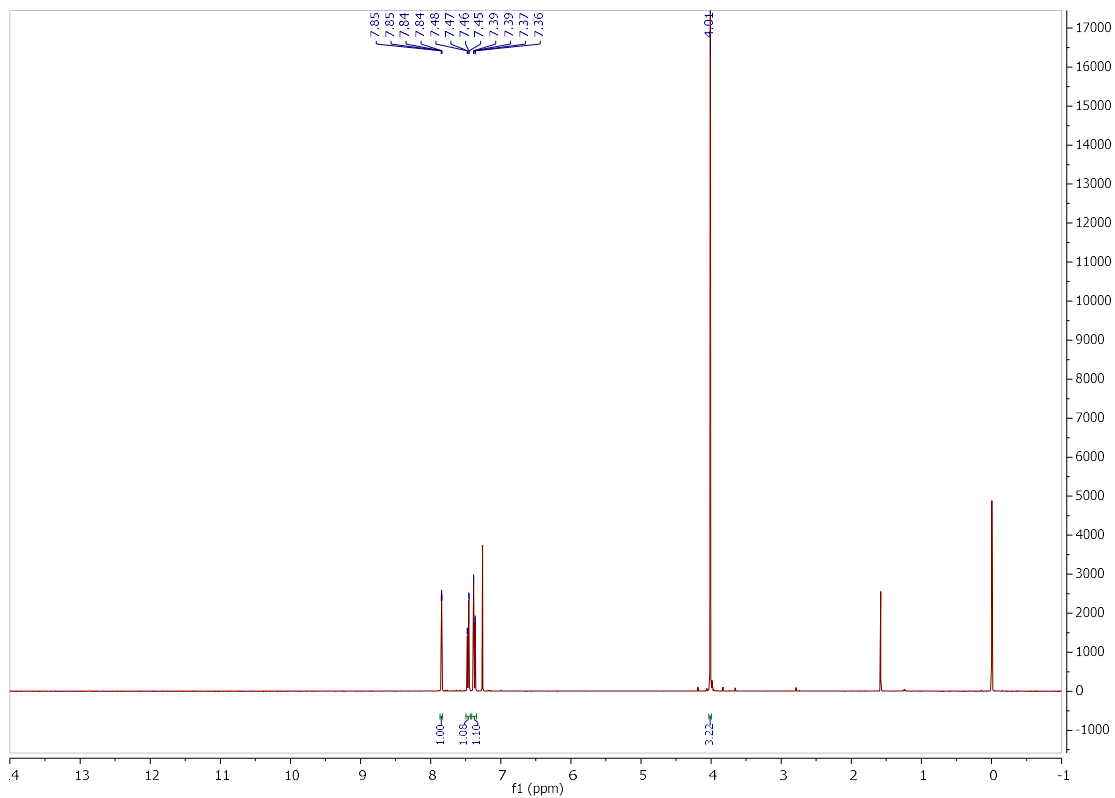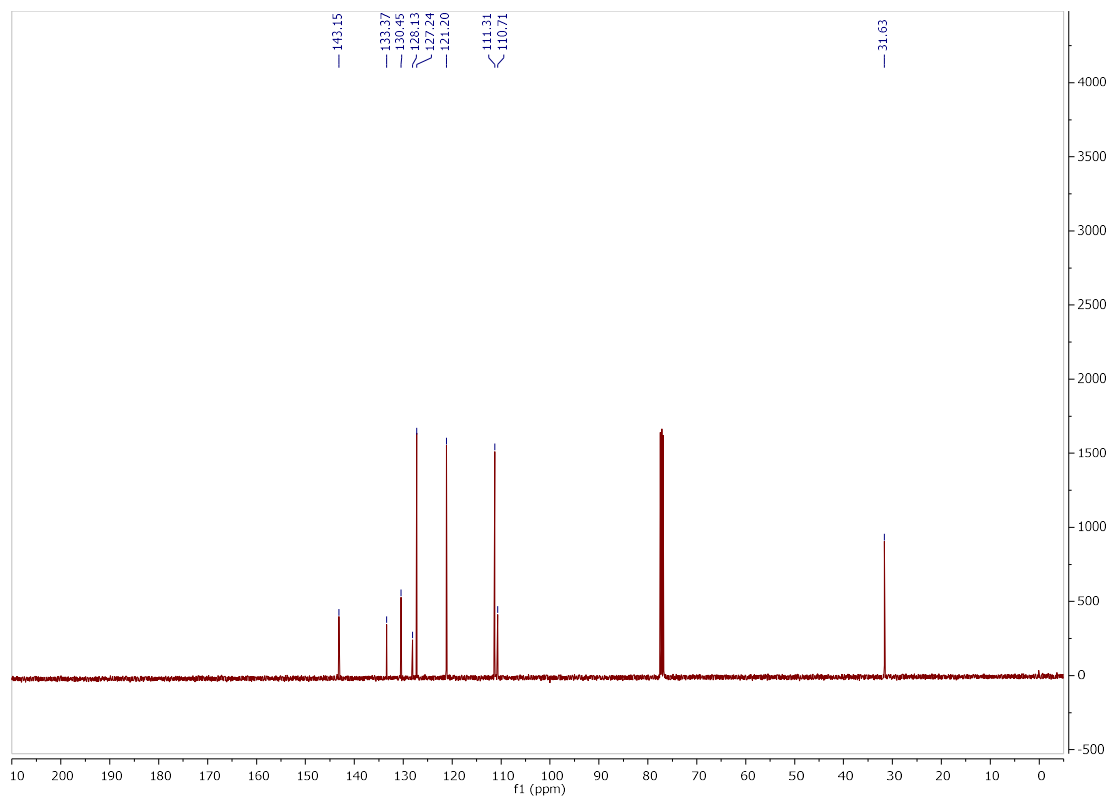

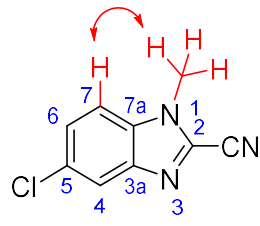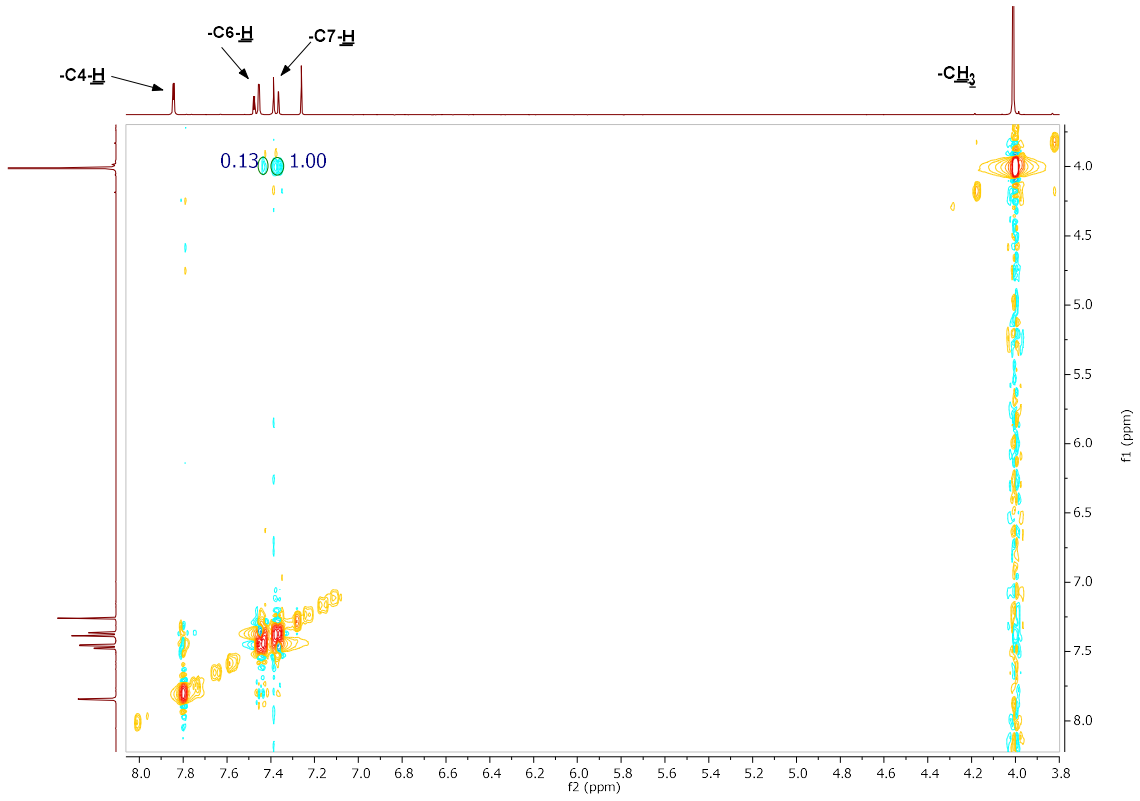

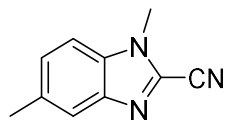

**Compound 31**

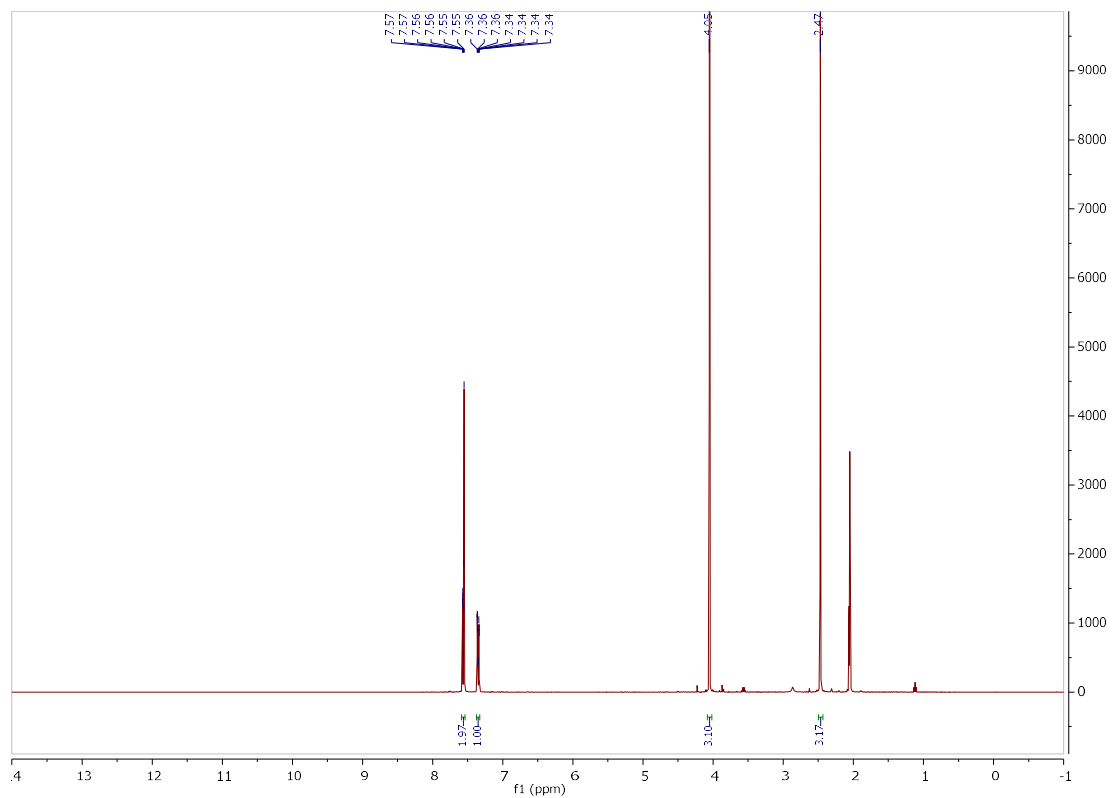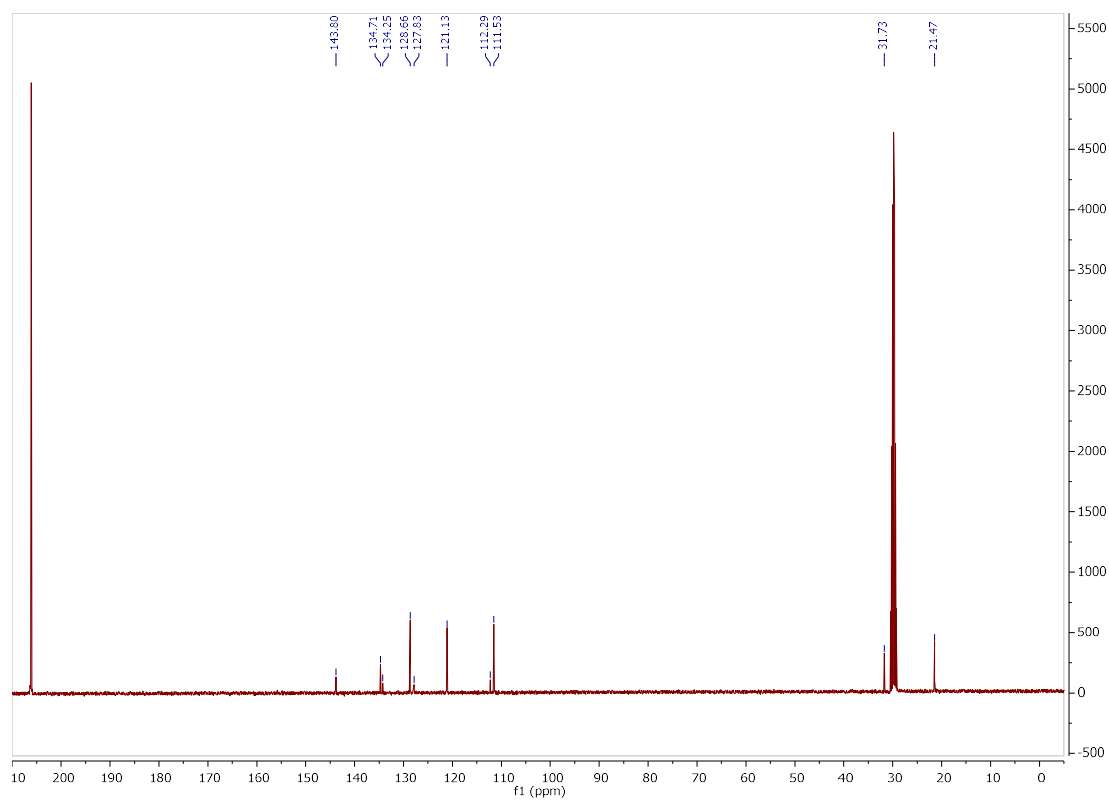

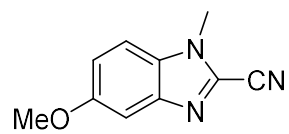

**Compound 32**

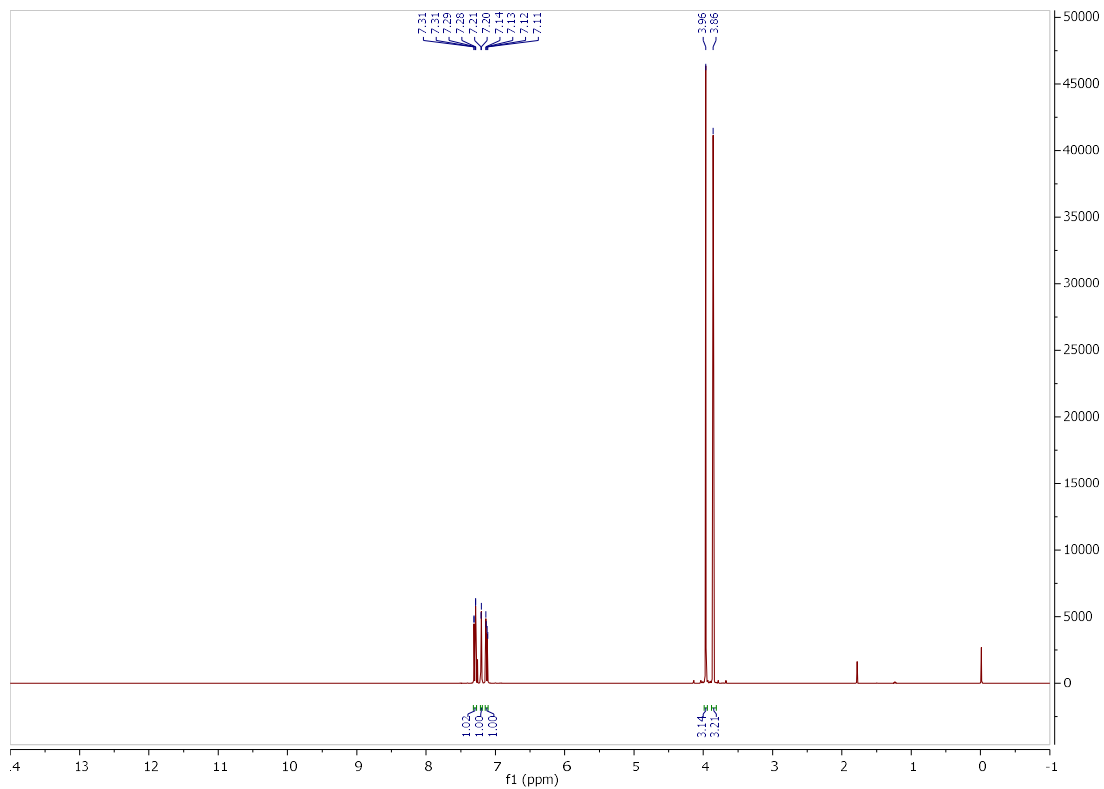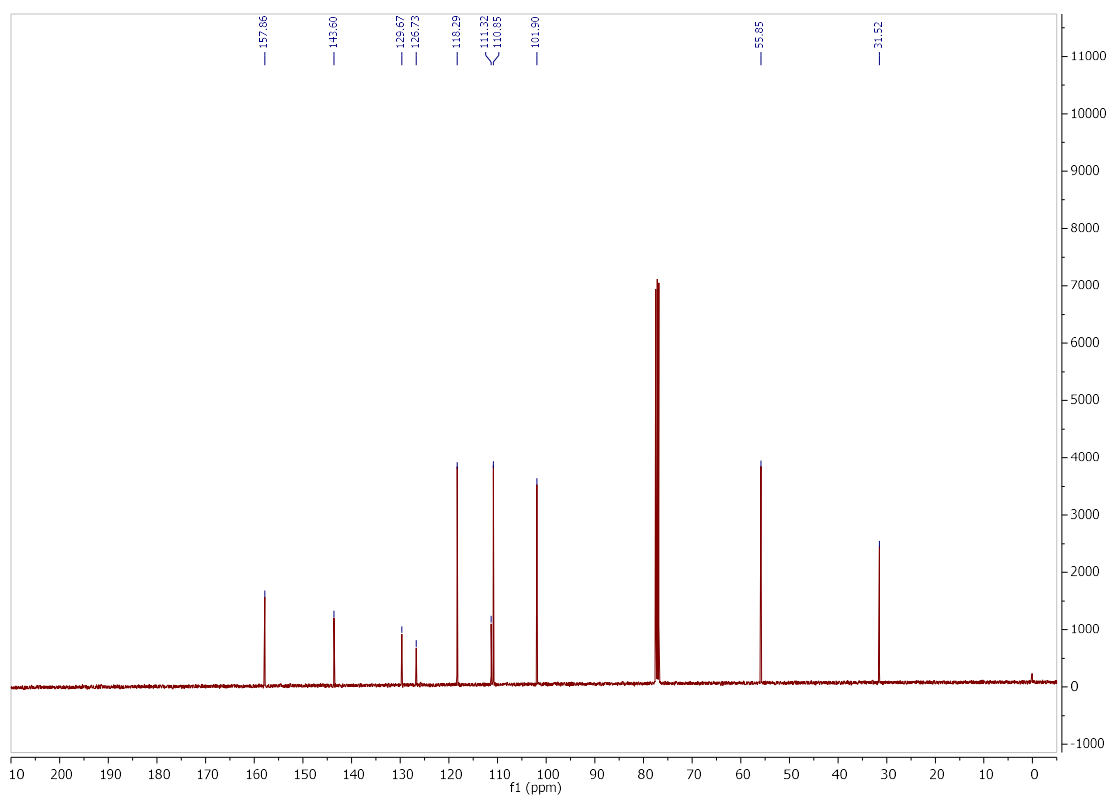

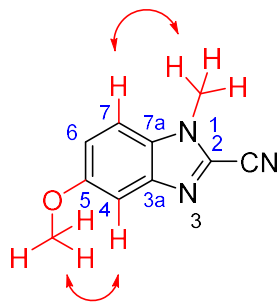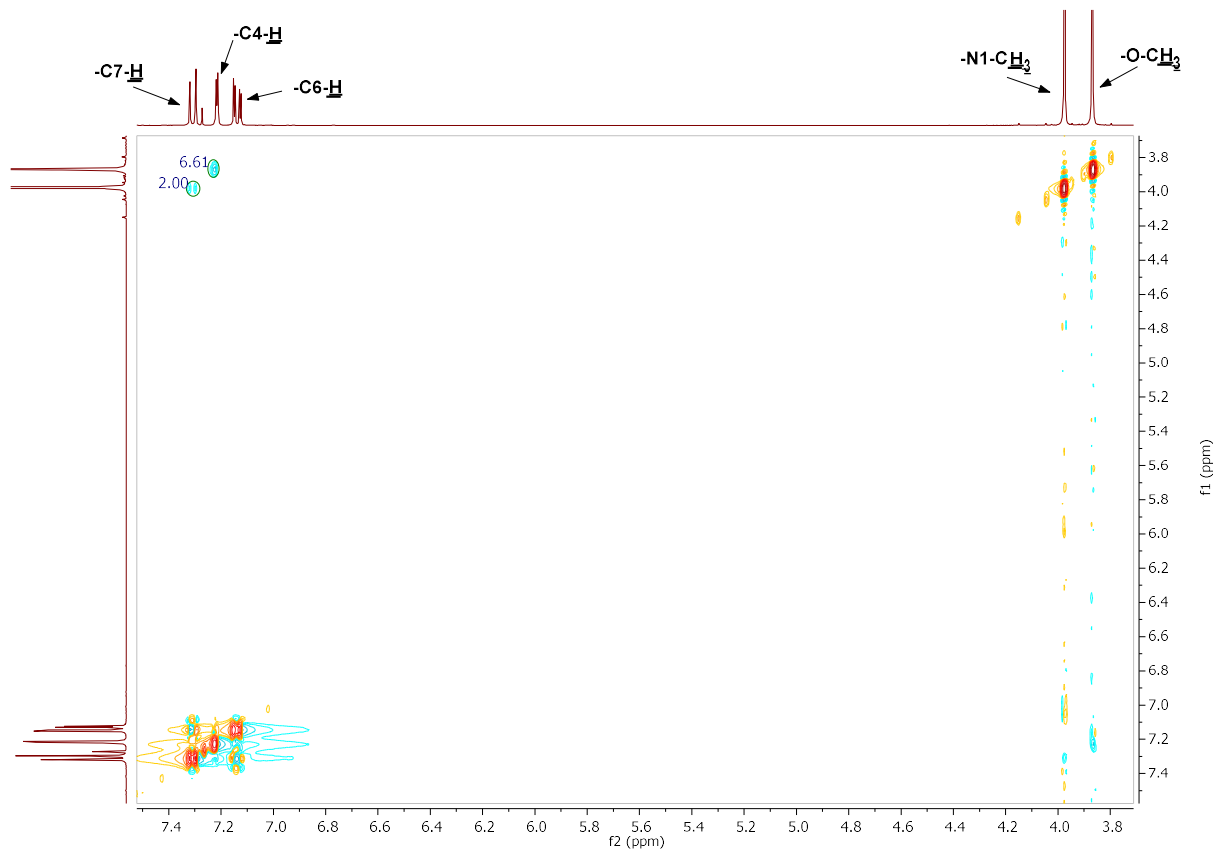

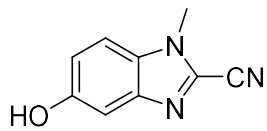

**Compound 33**

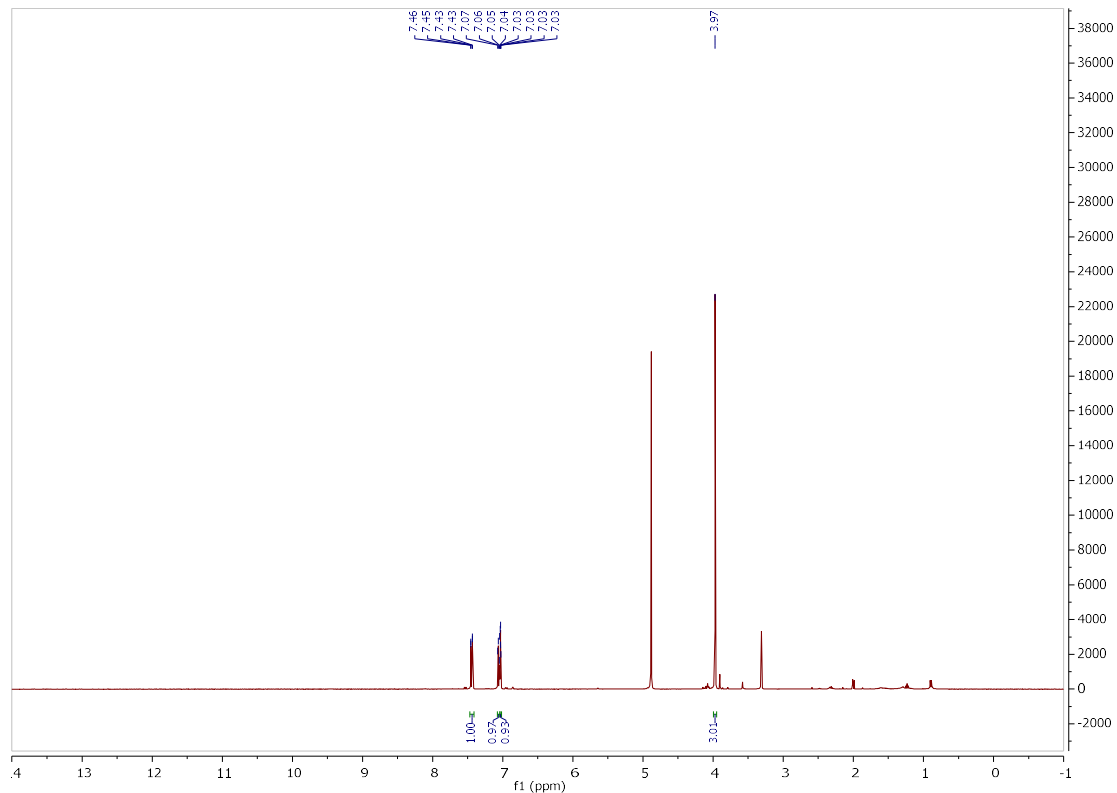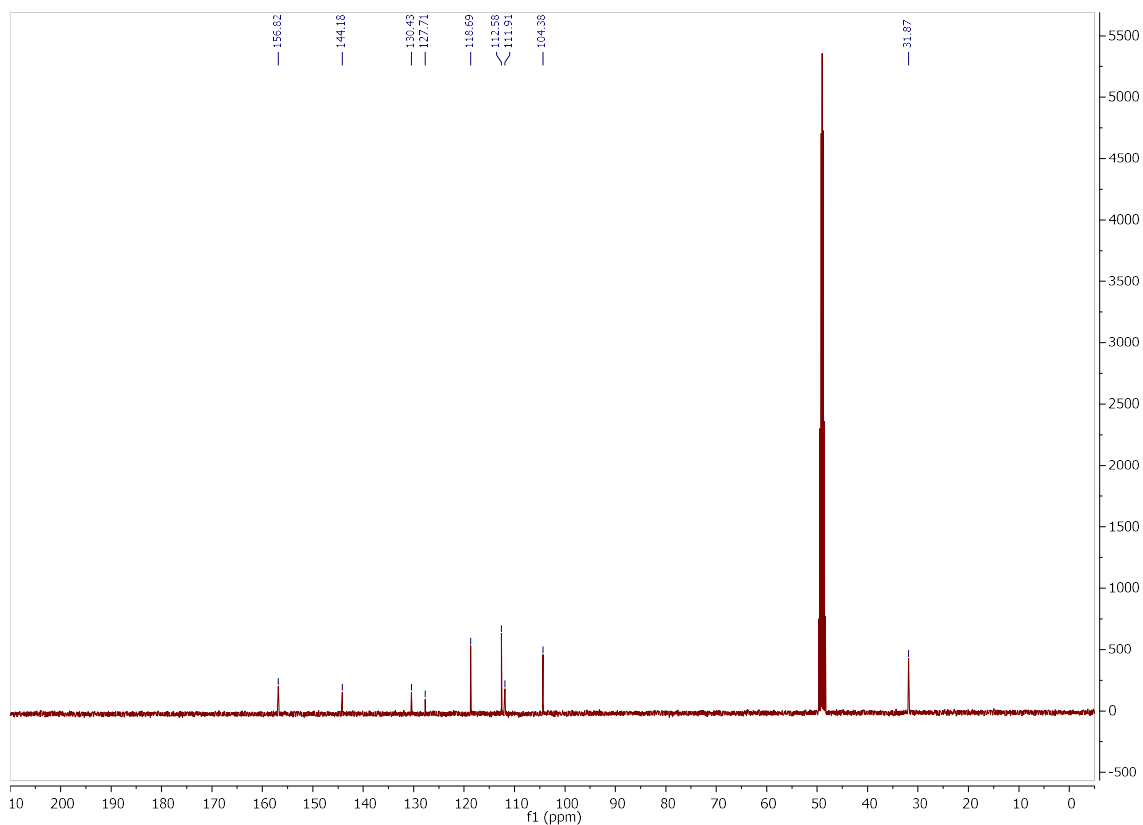



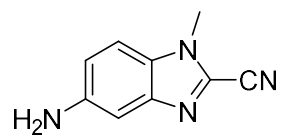

Compound 34

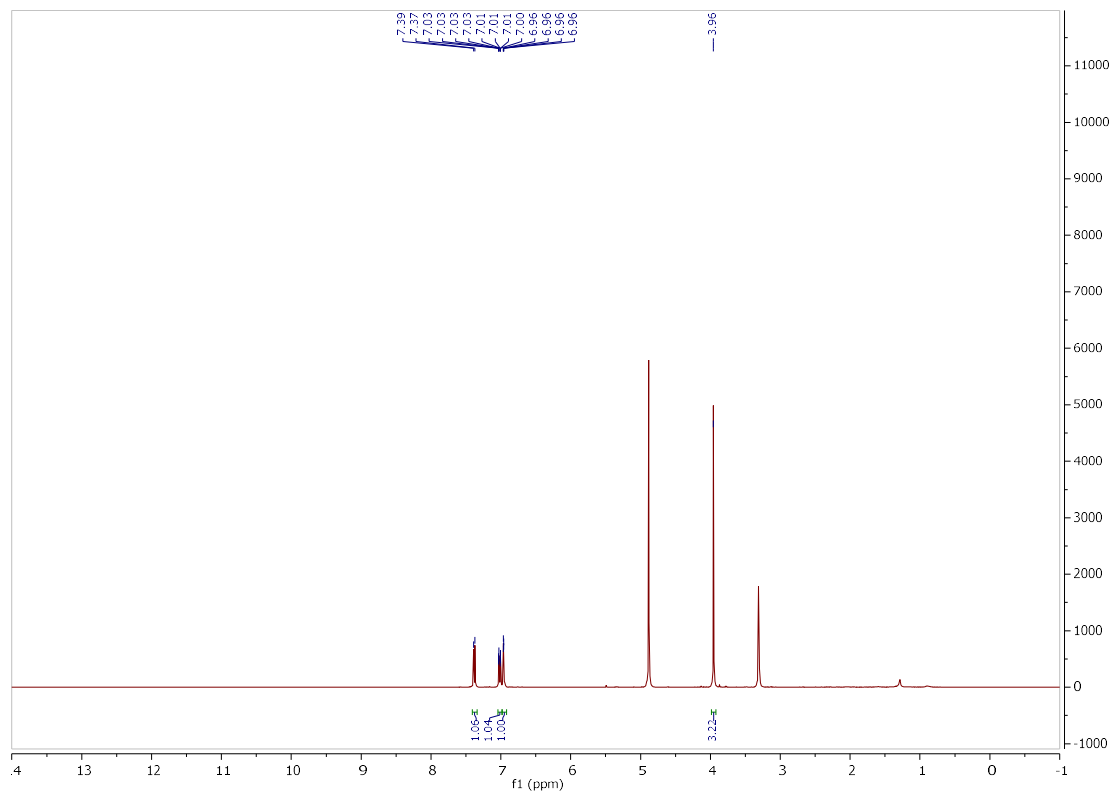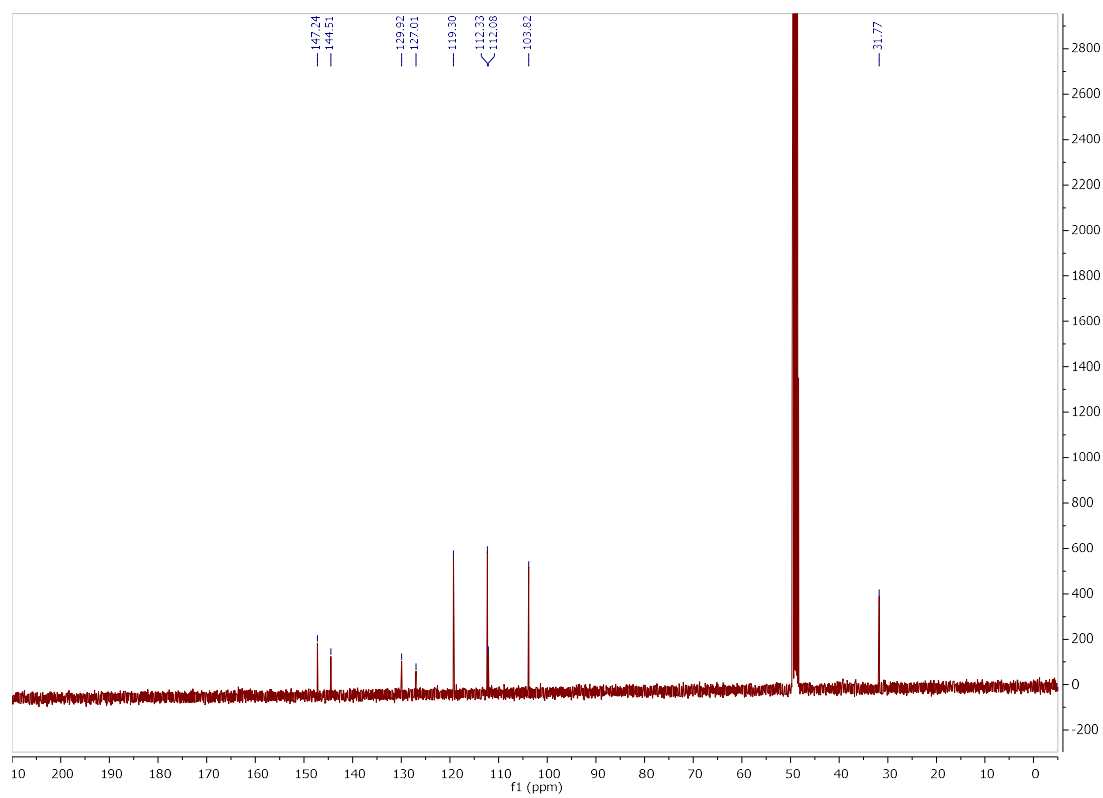

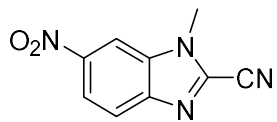

Compound 35

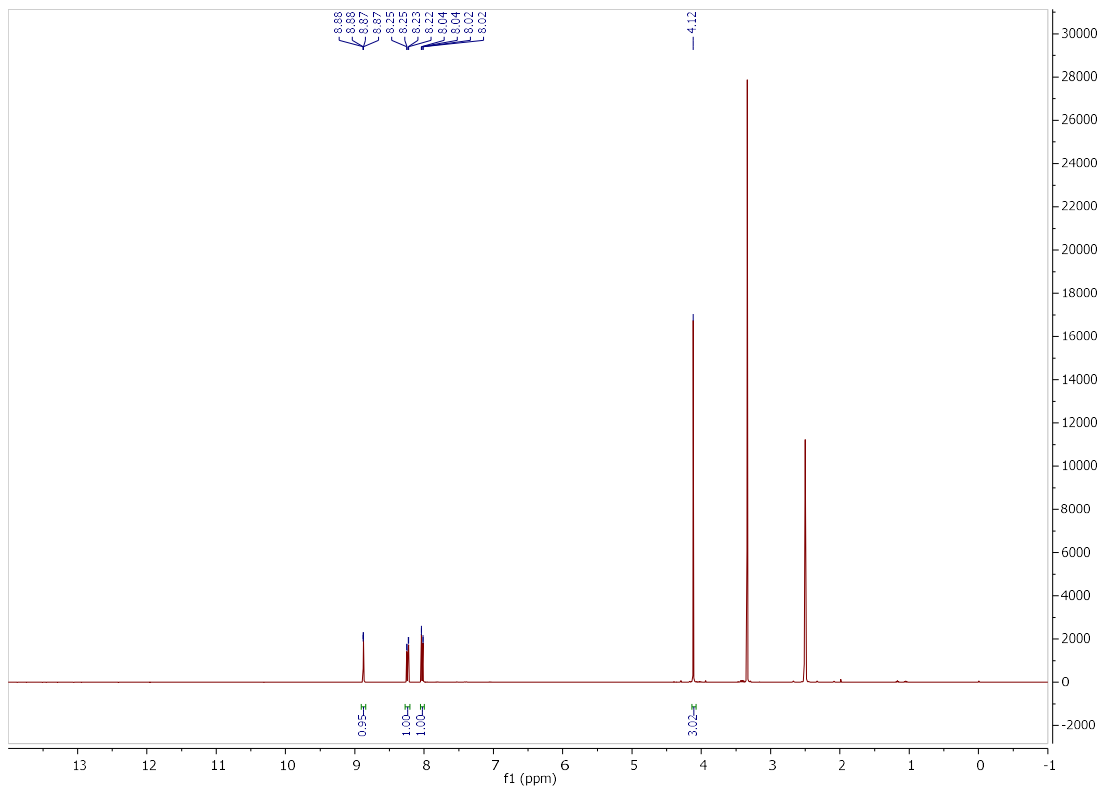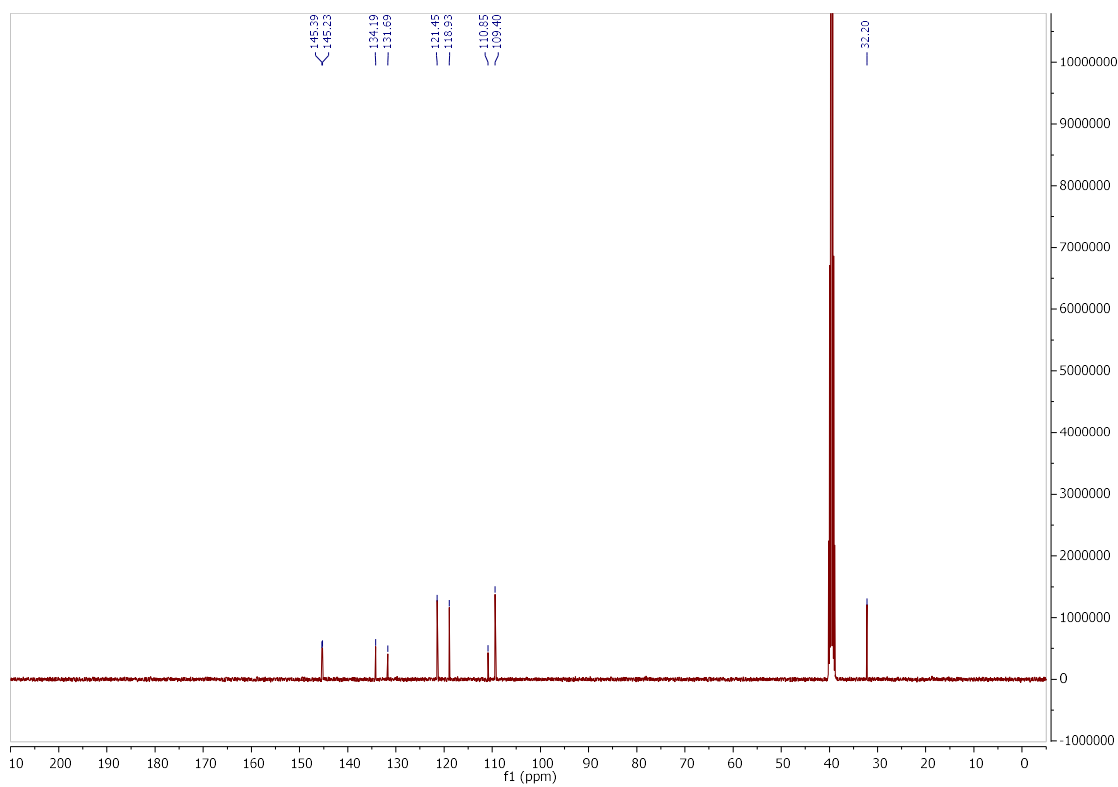

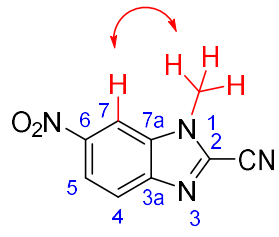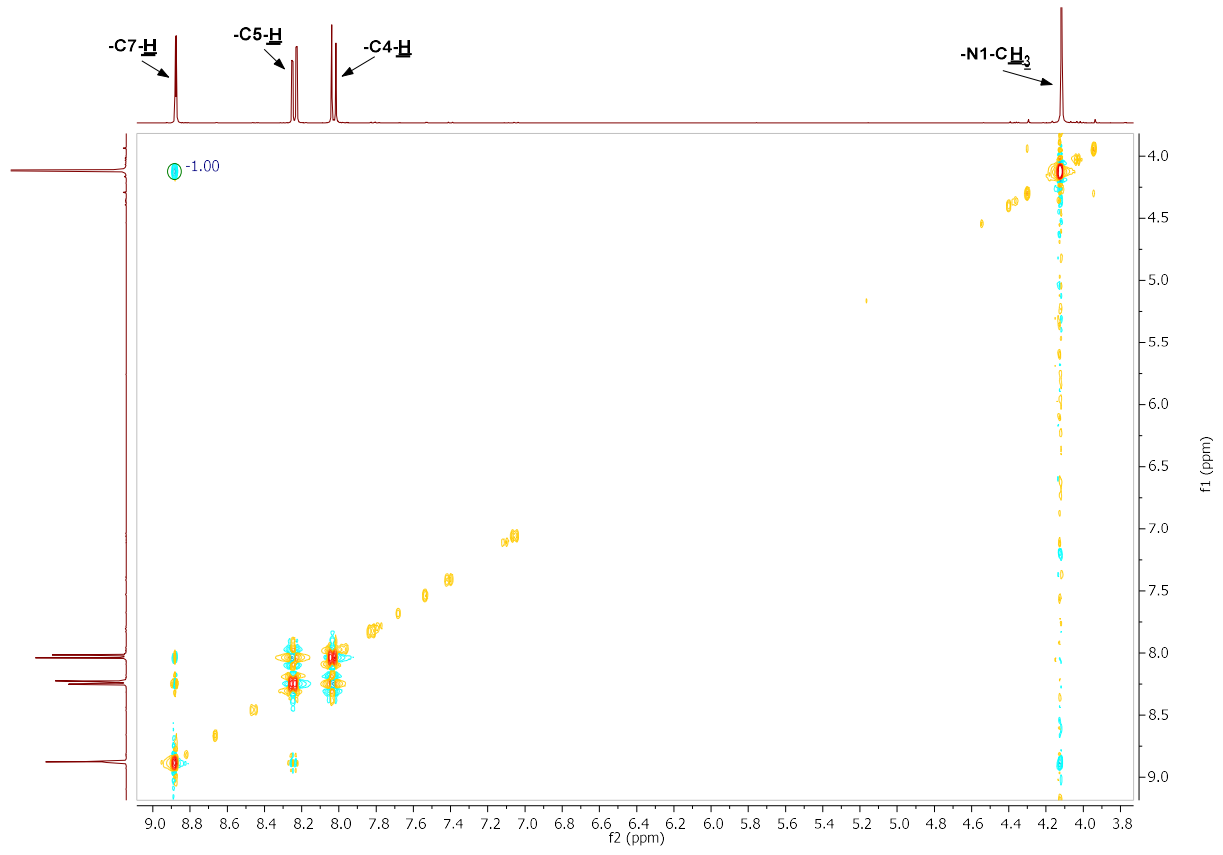

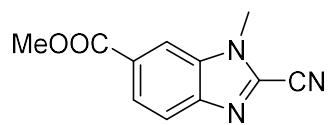

**Compound 36**

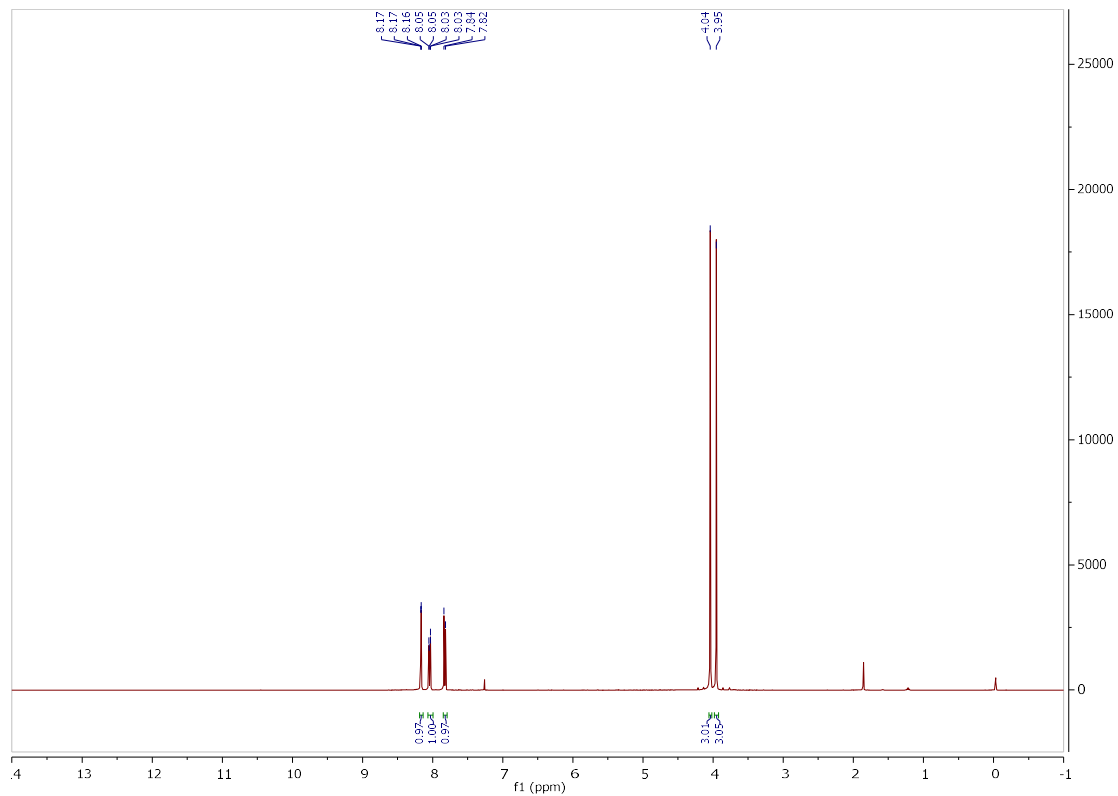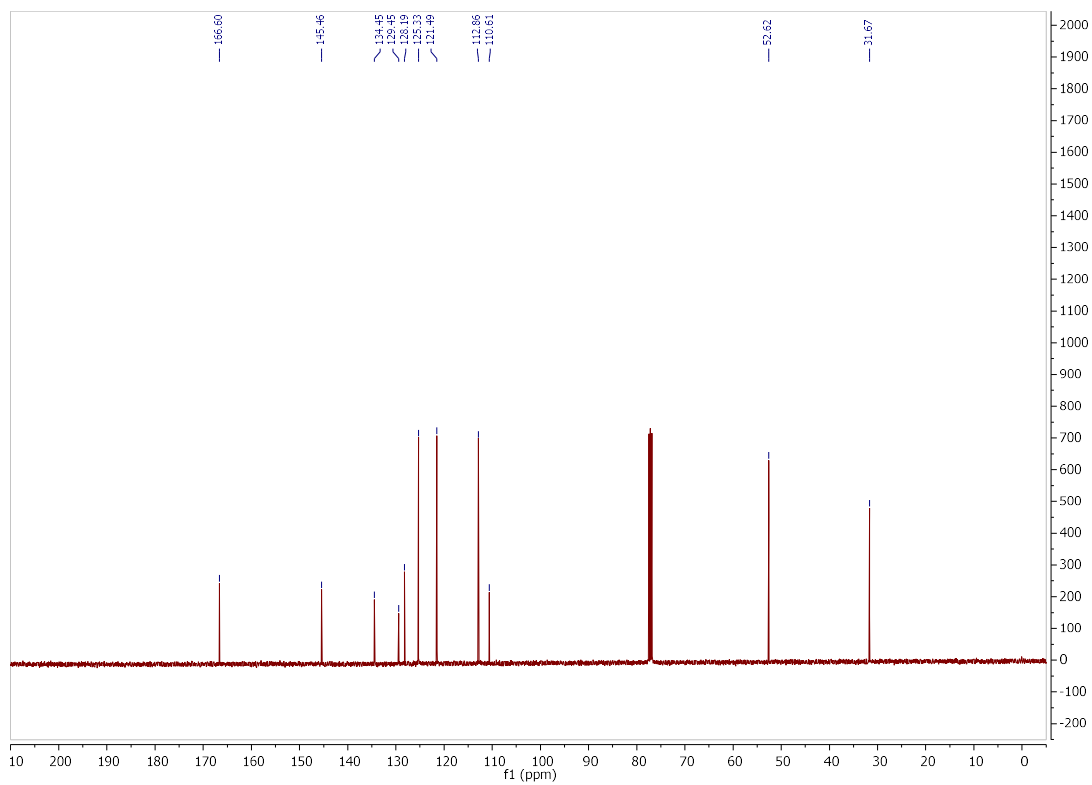

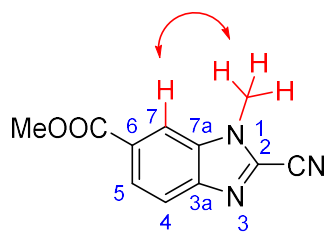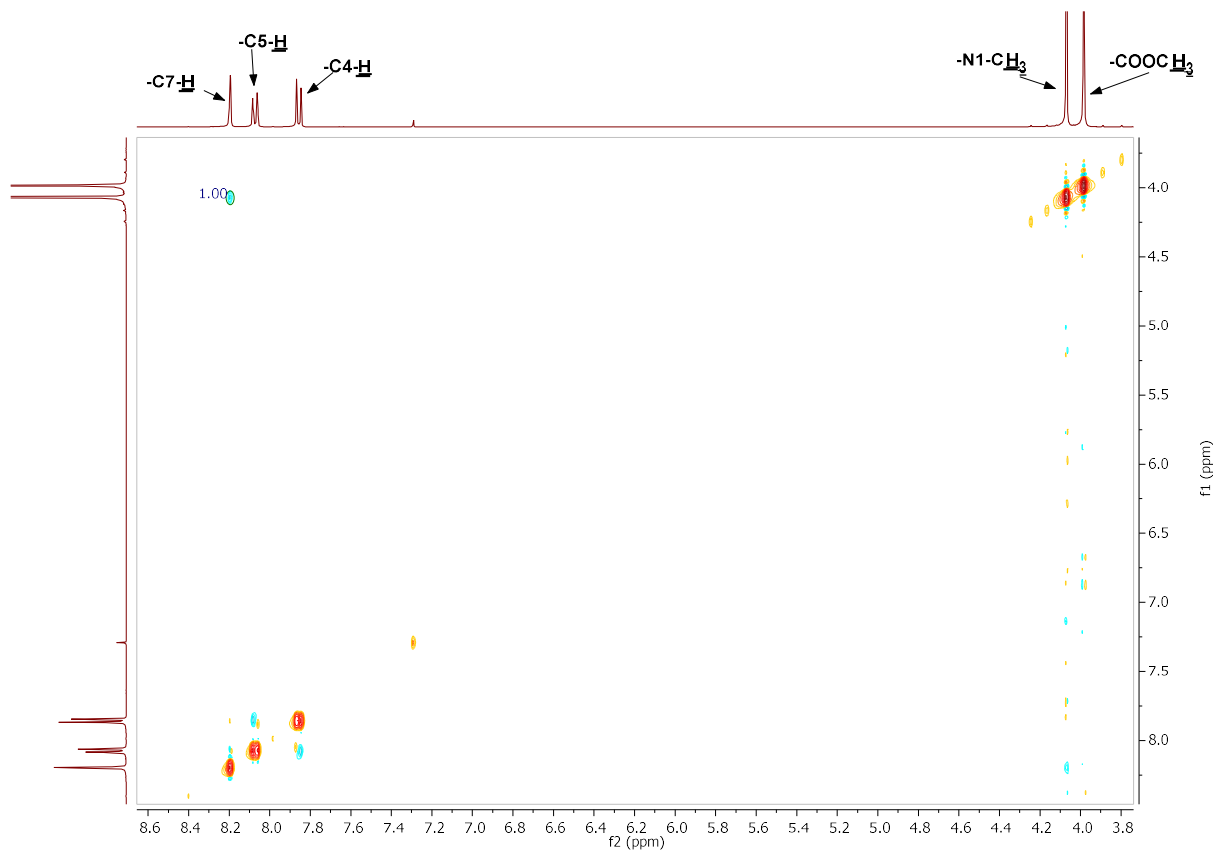

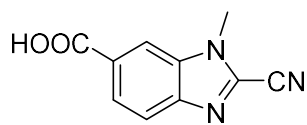

**Compound 37**

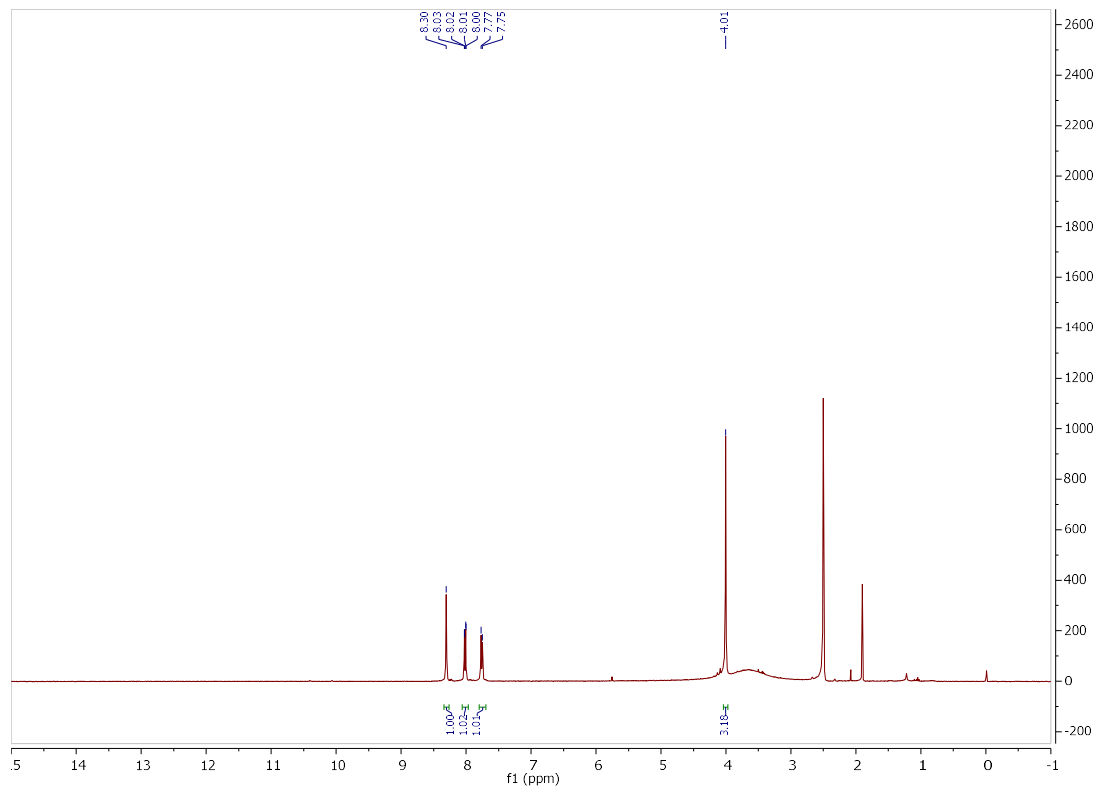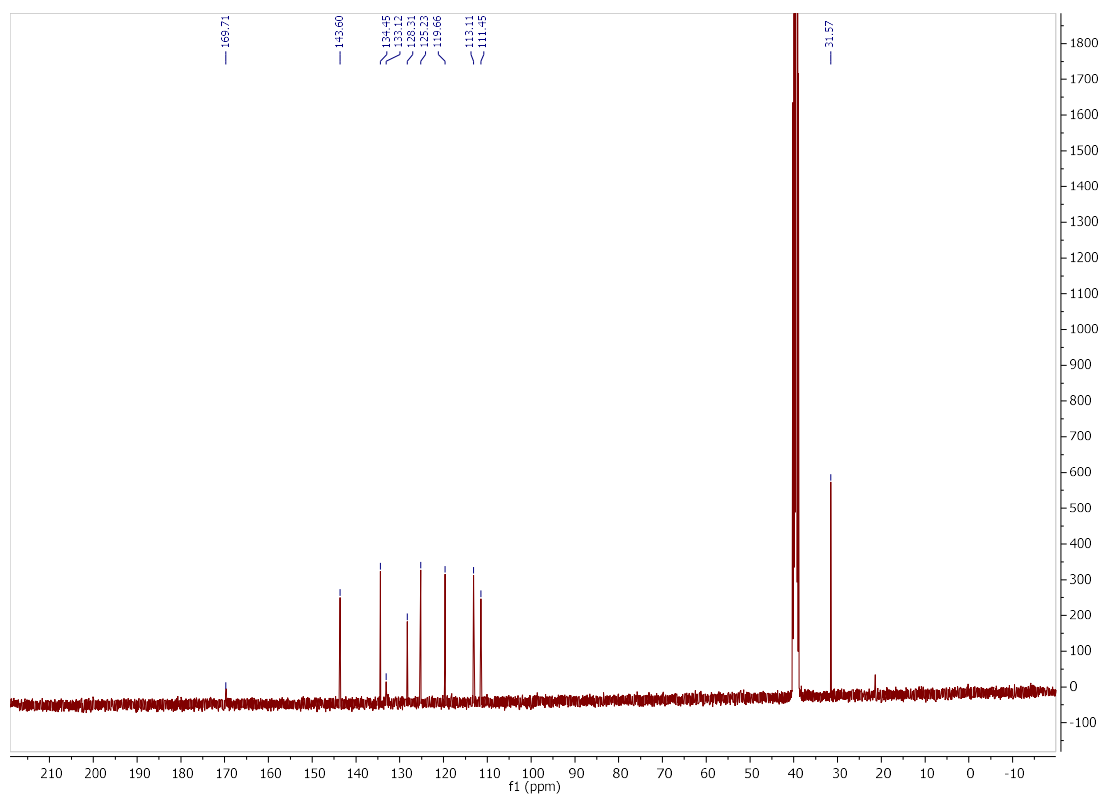



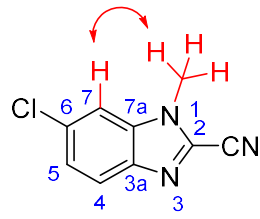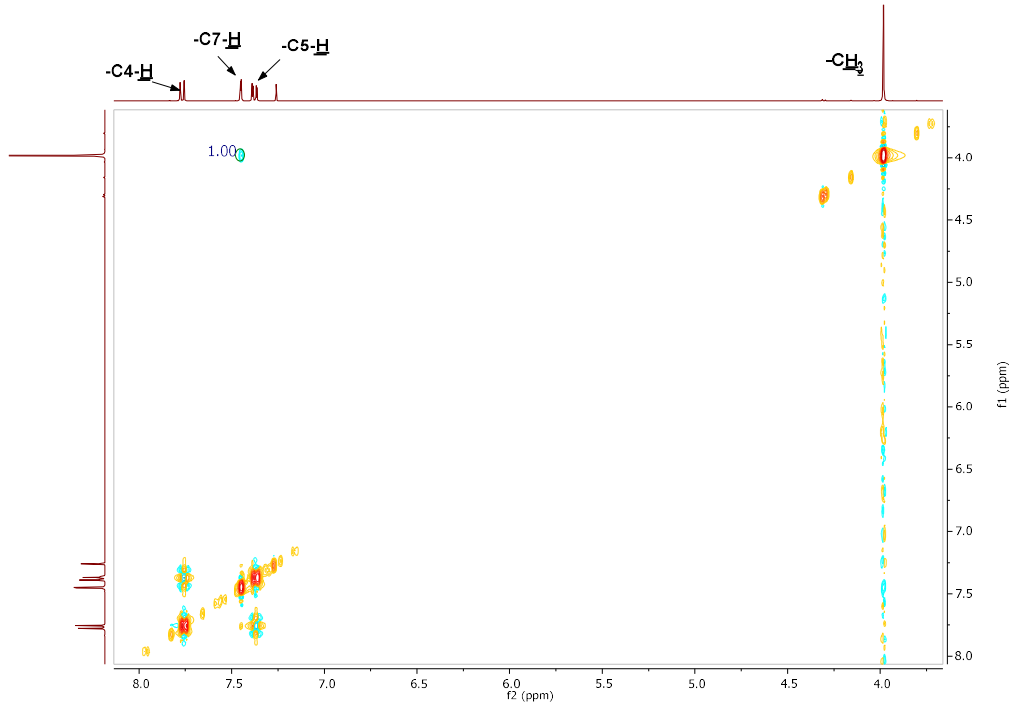



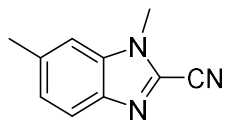

Compound 39

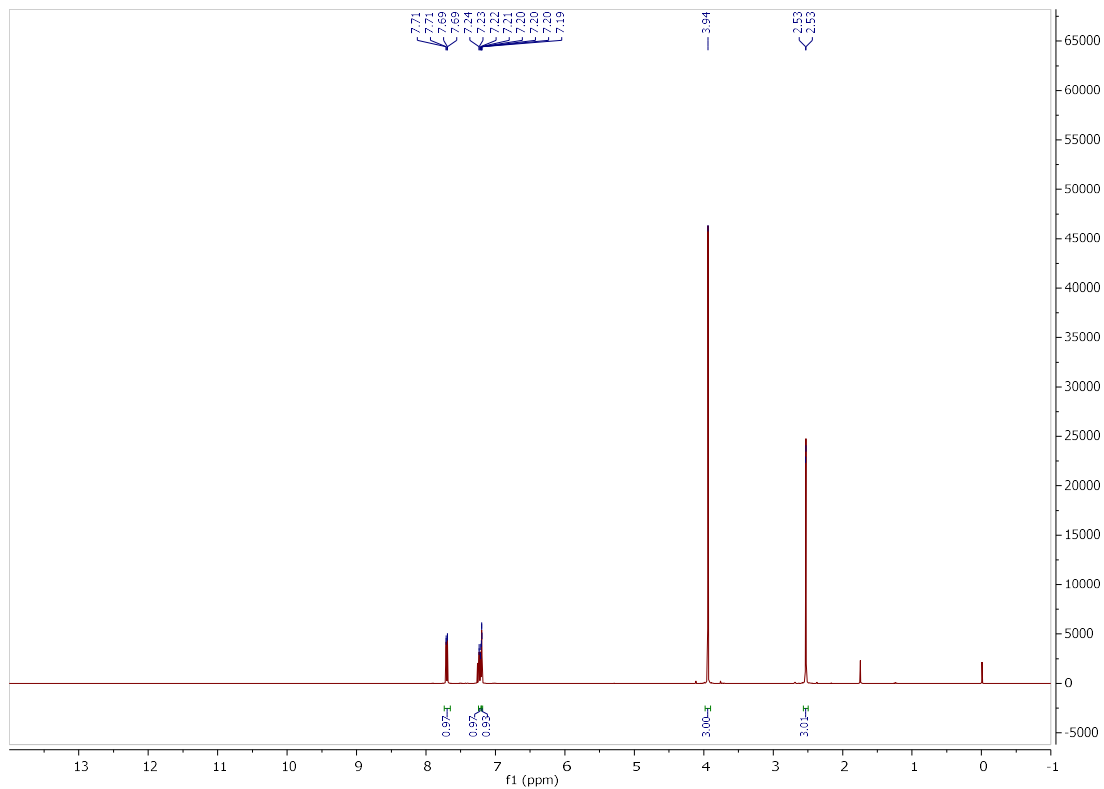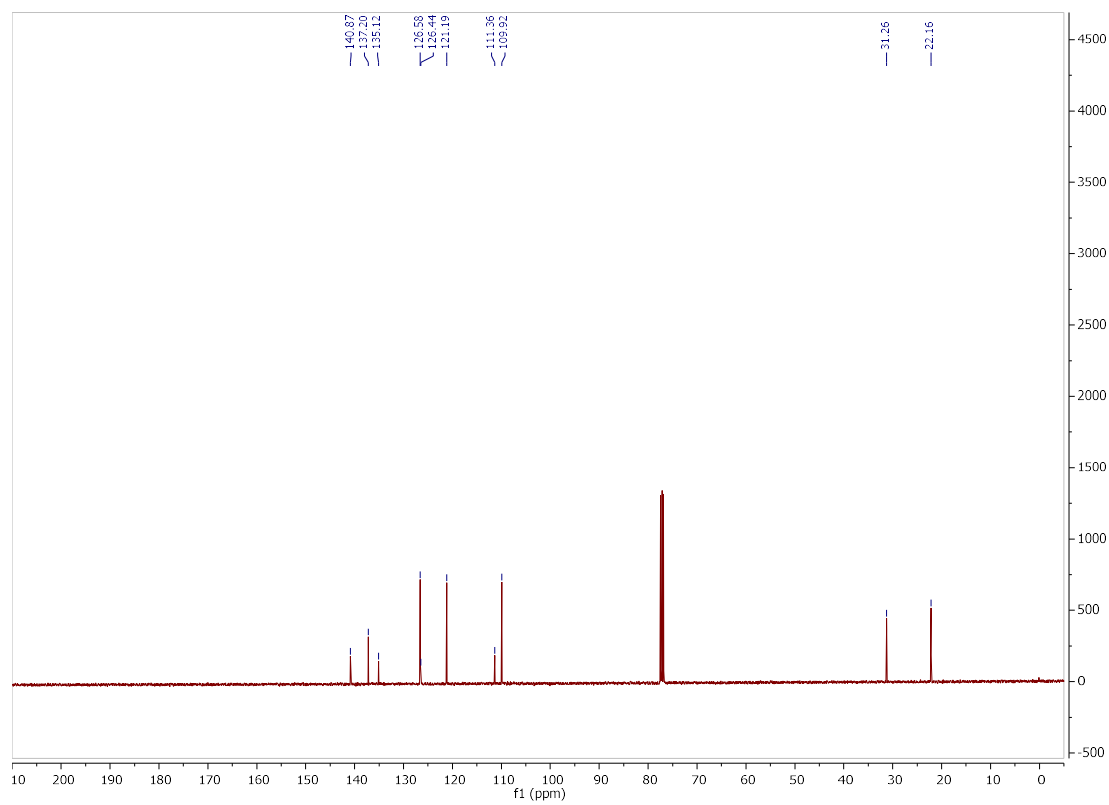

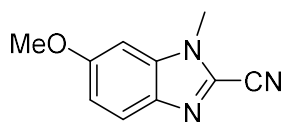

**Compound 40**

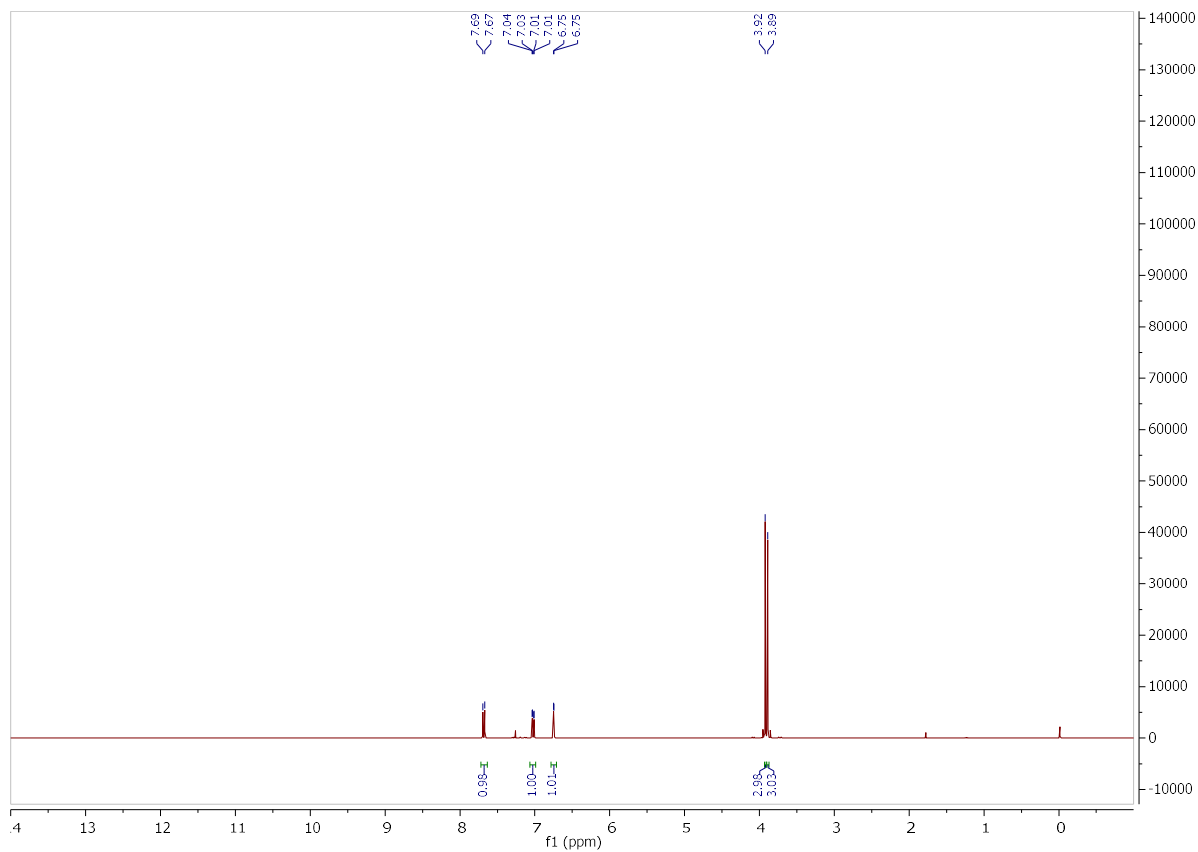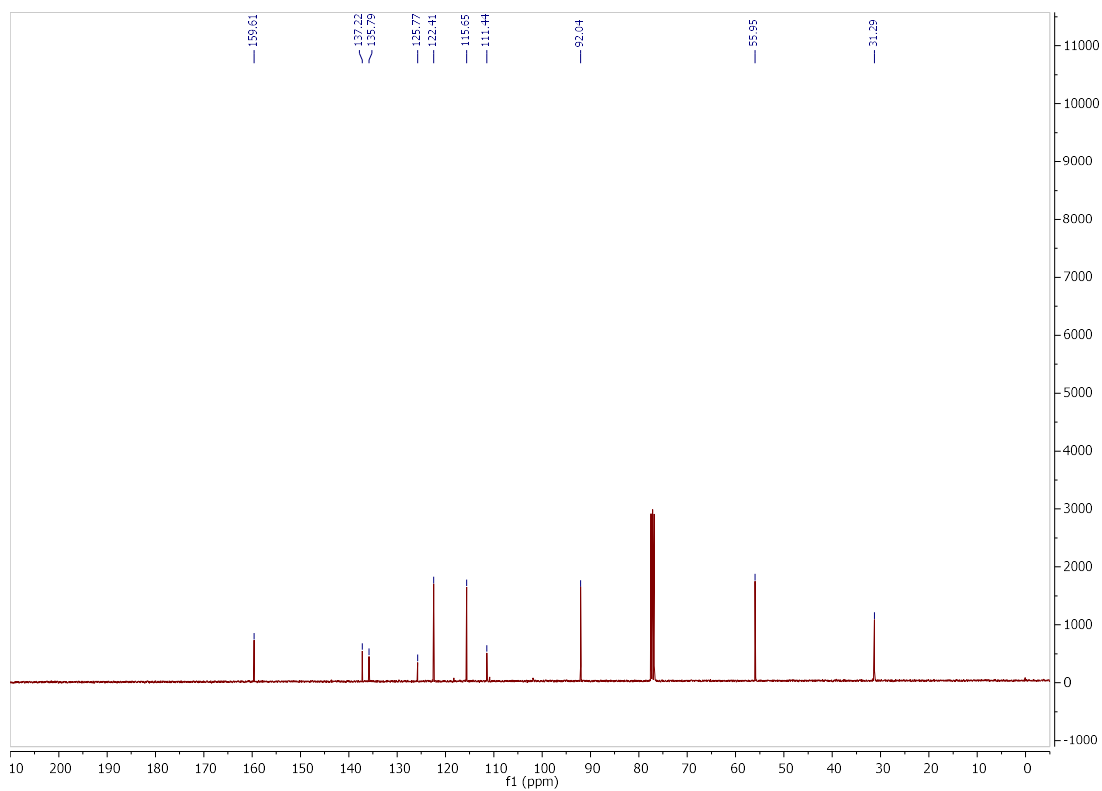

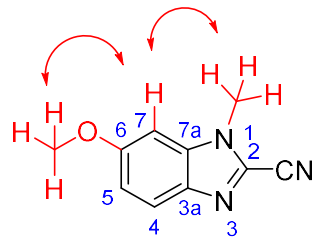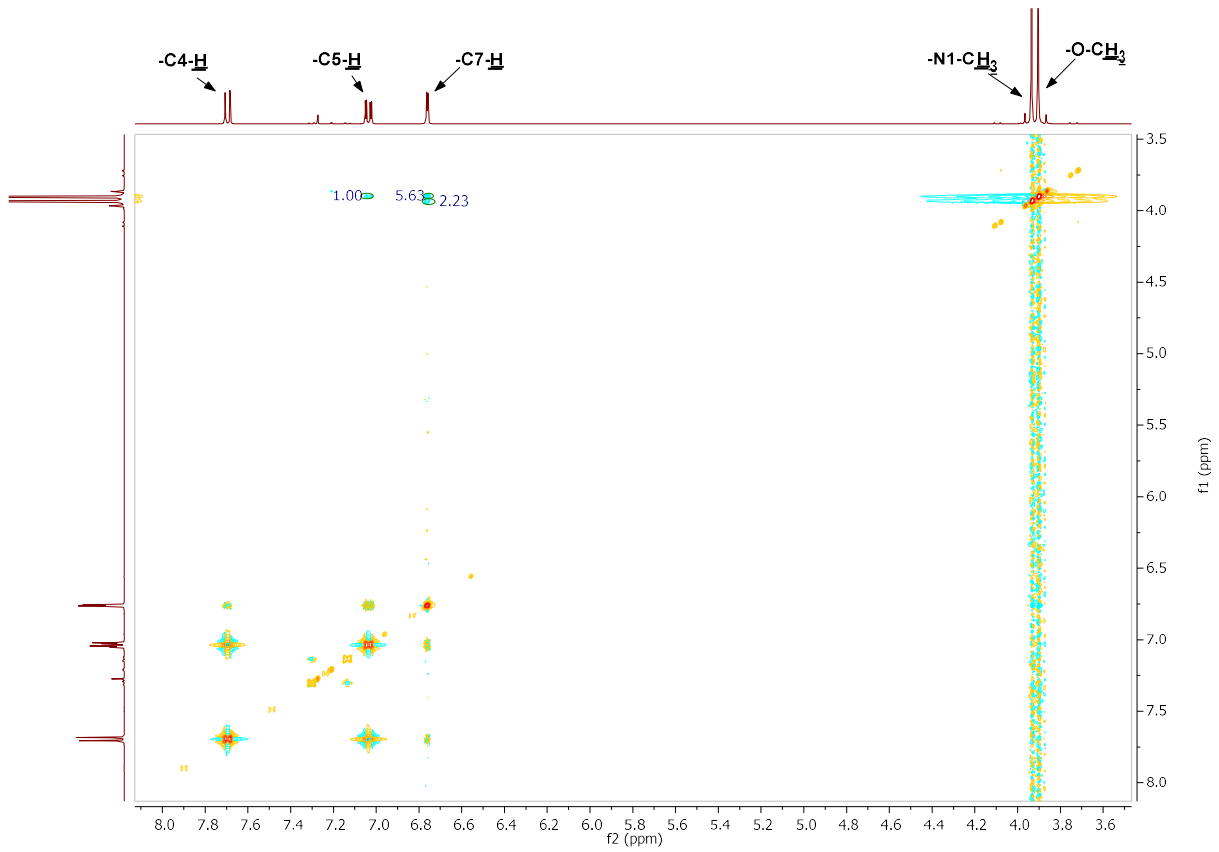

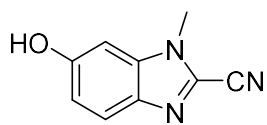

**Compound 41**

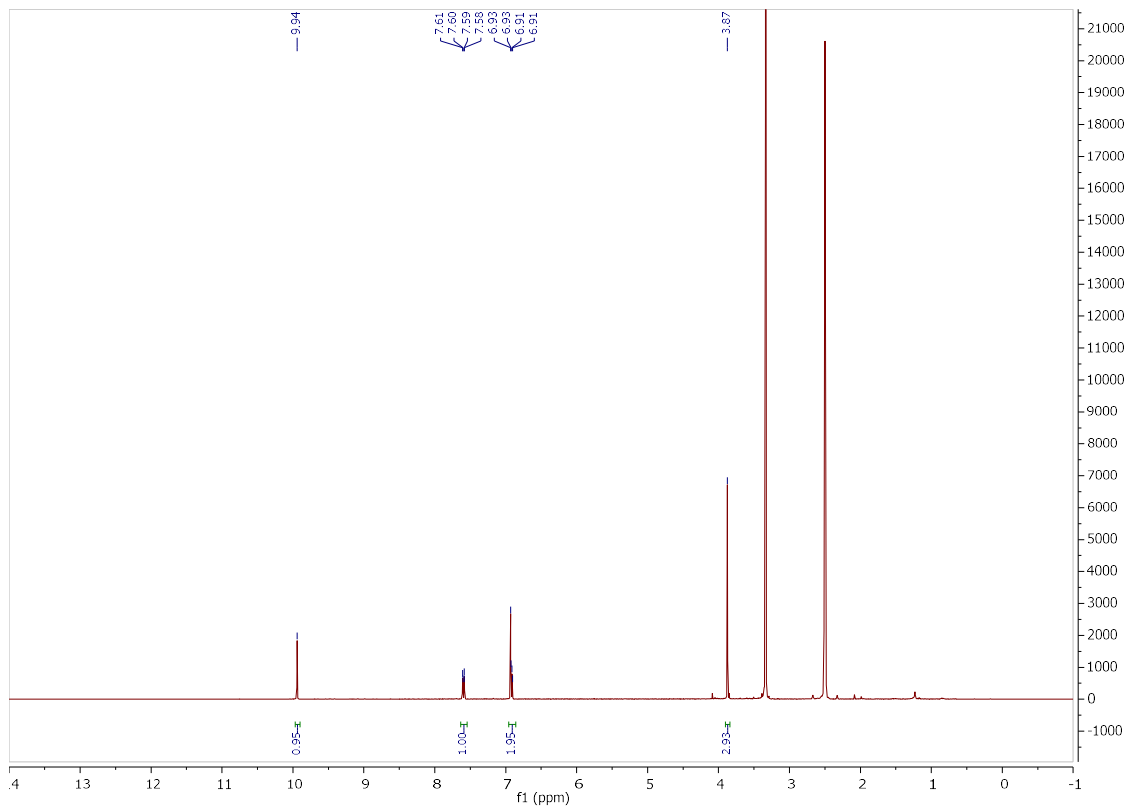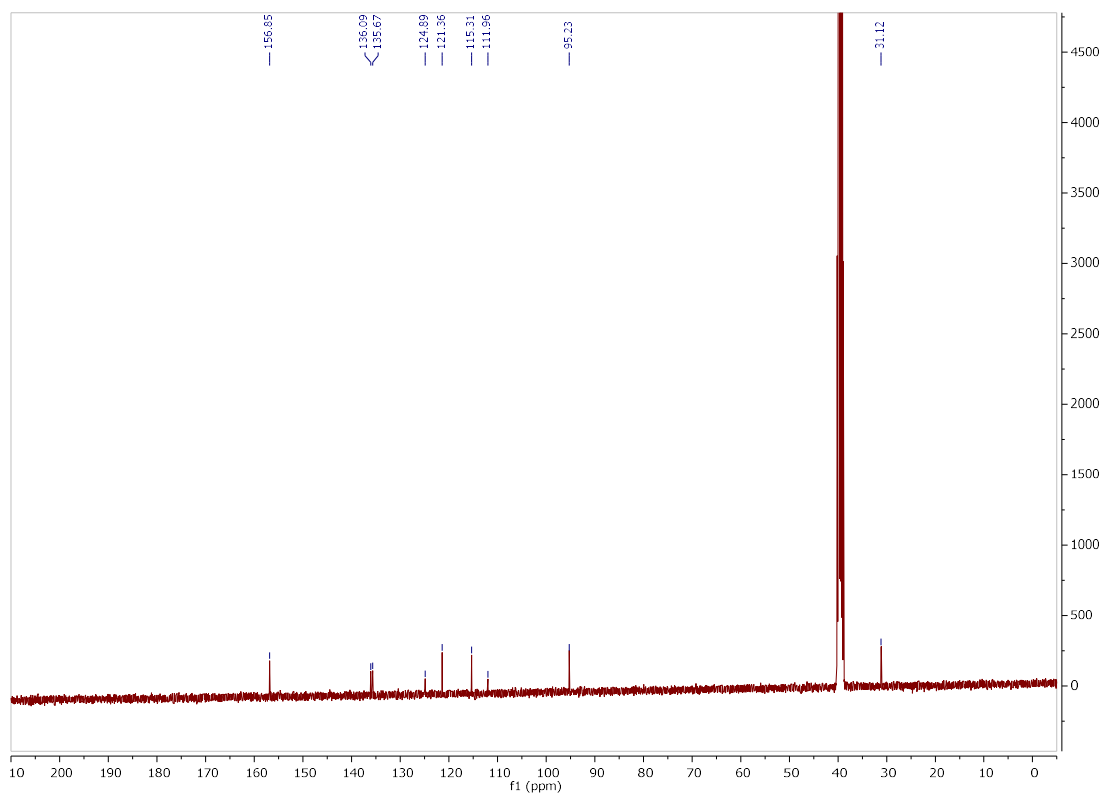

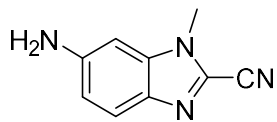

Compound 42

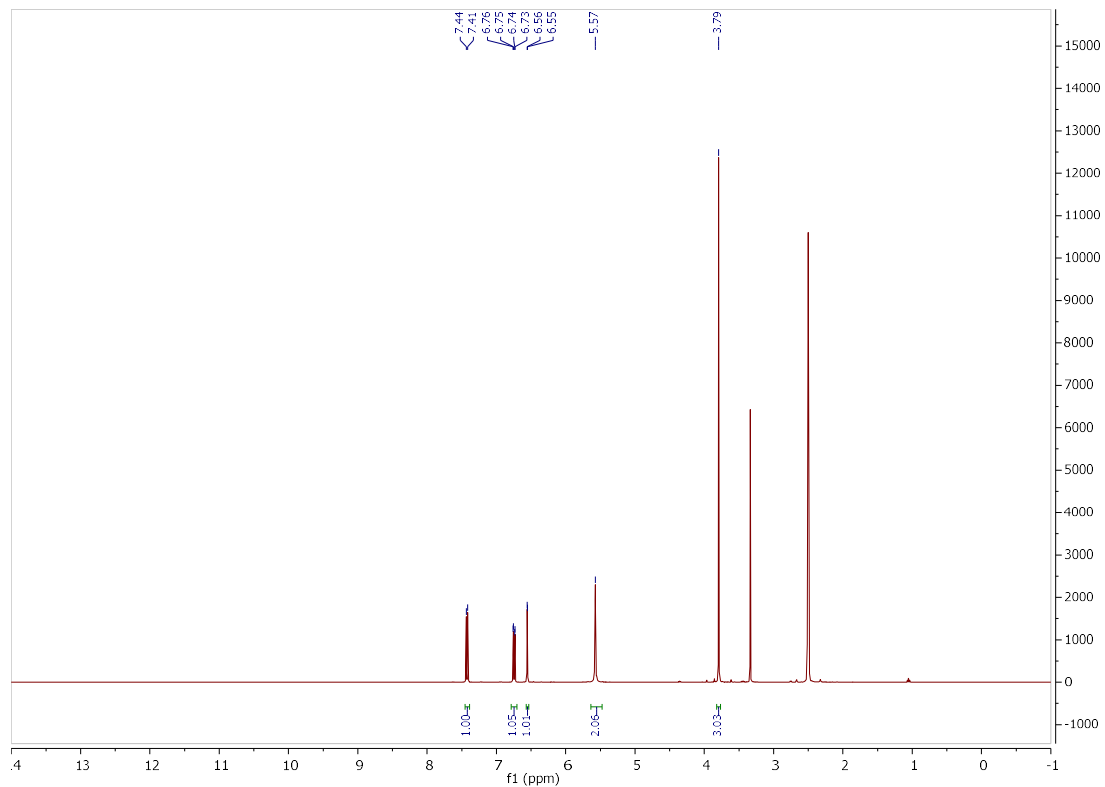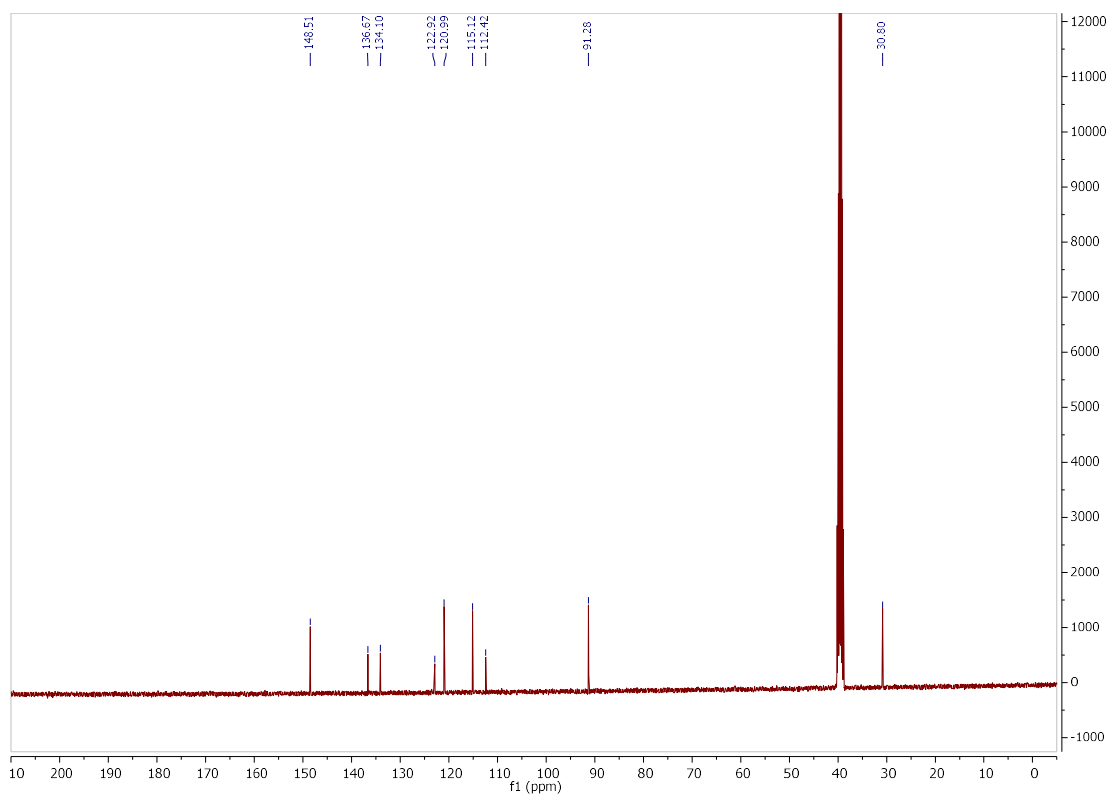

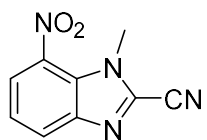

**Compound 43**

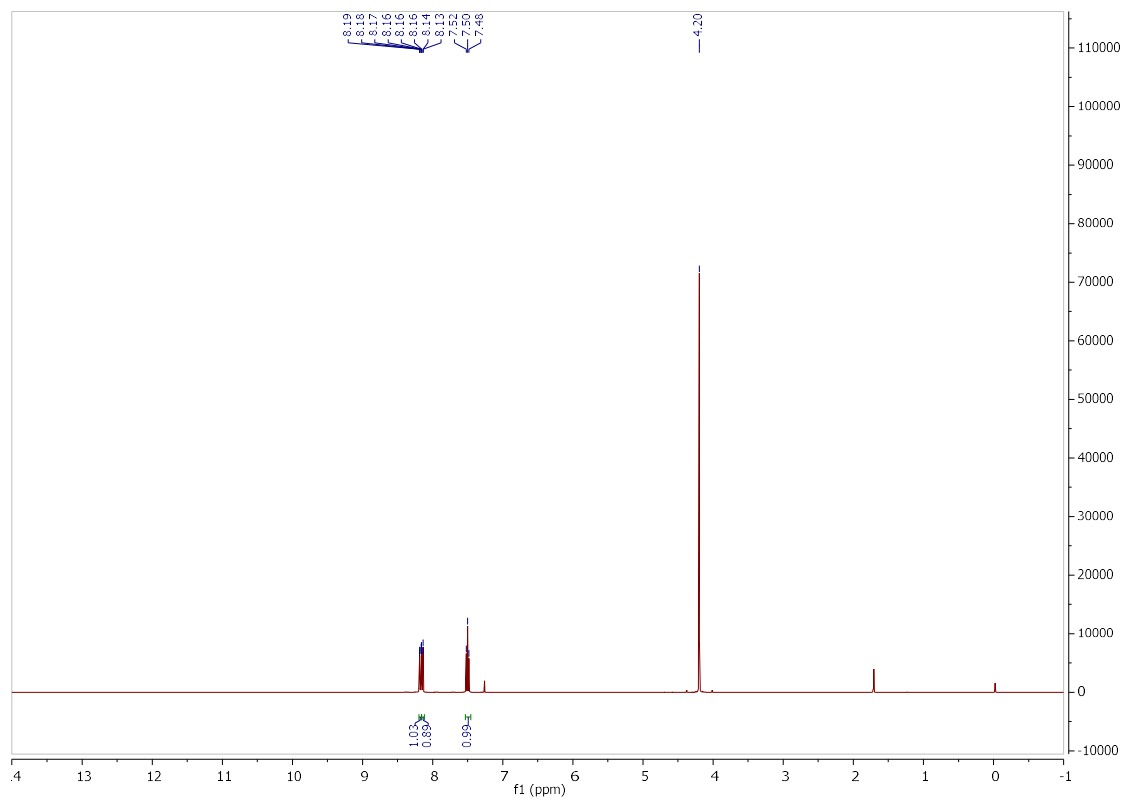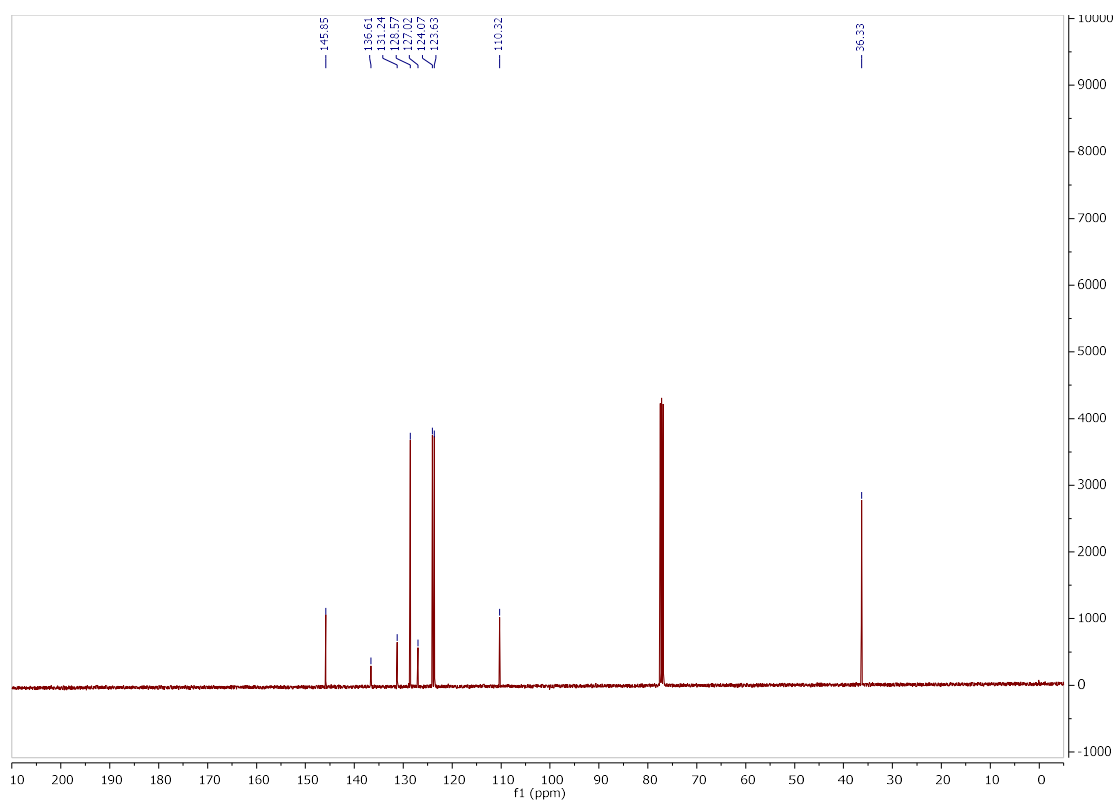

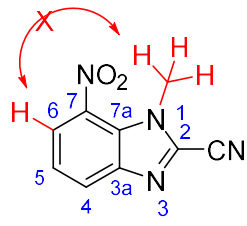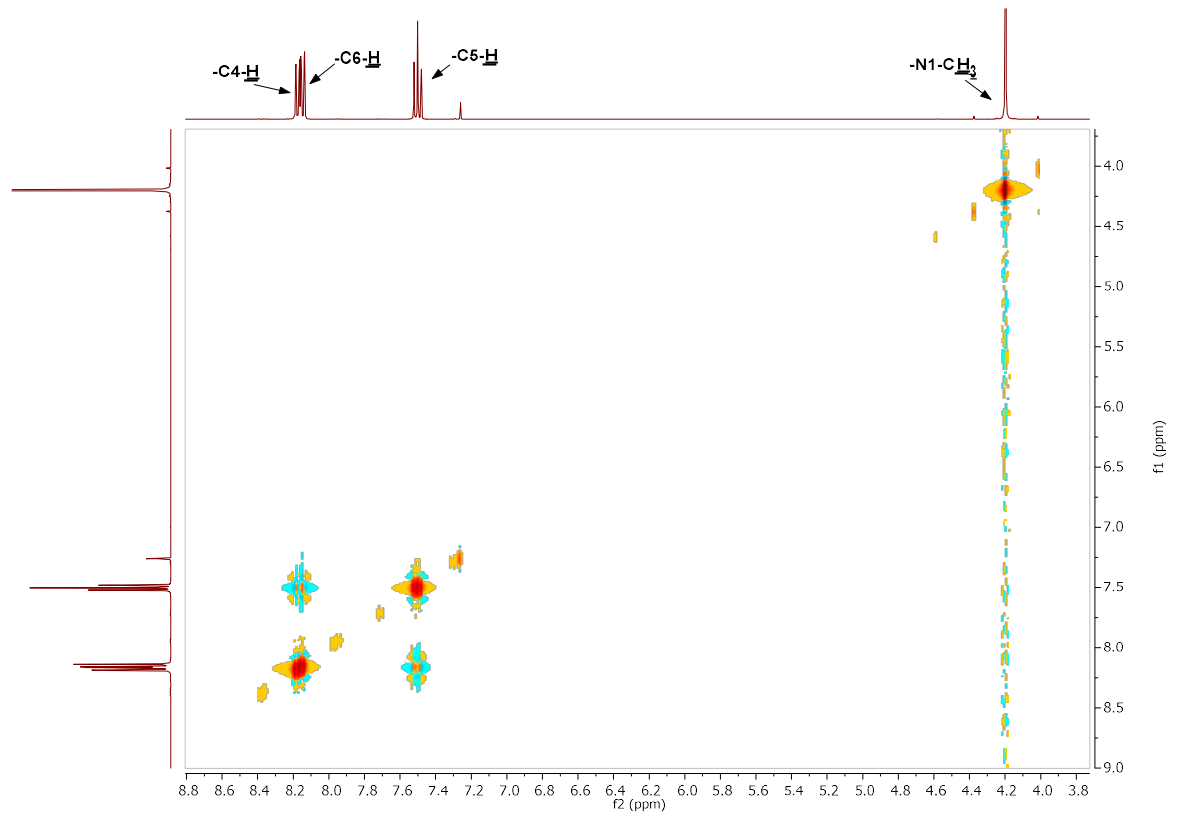

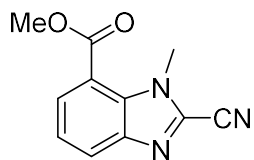

**Compound 44**

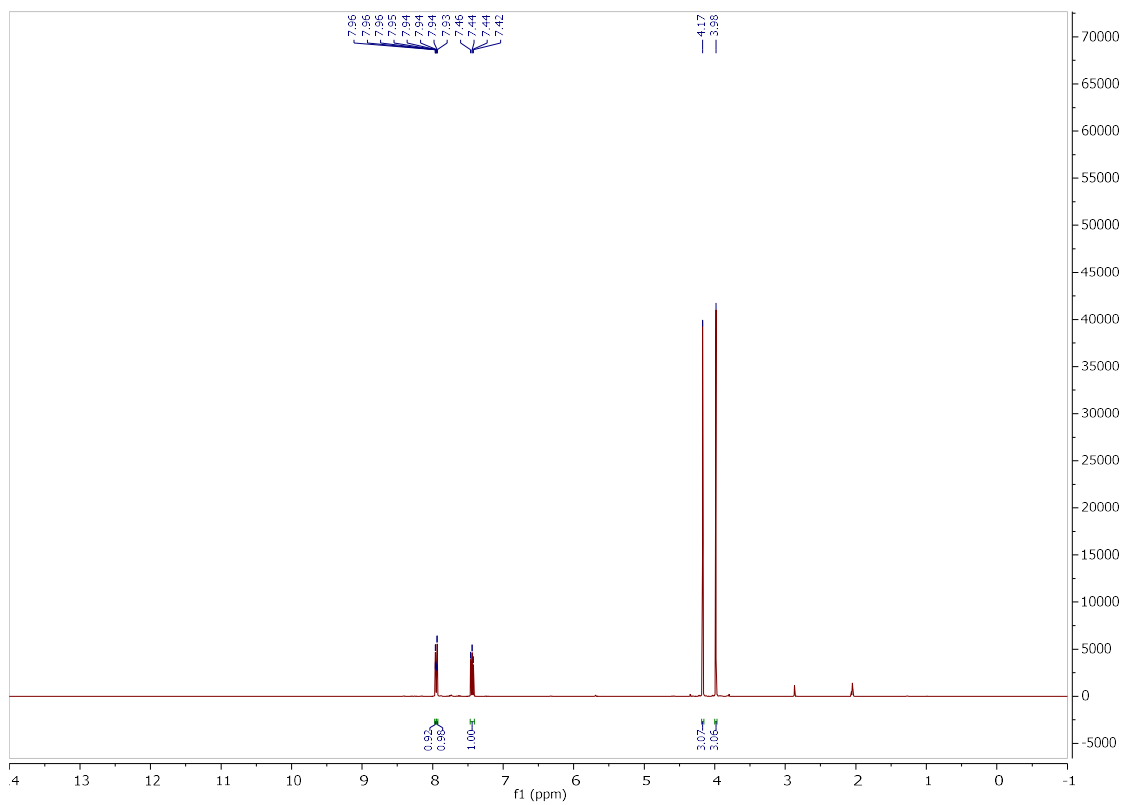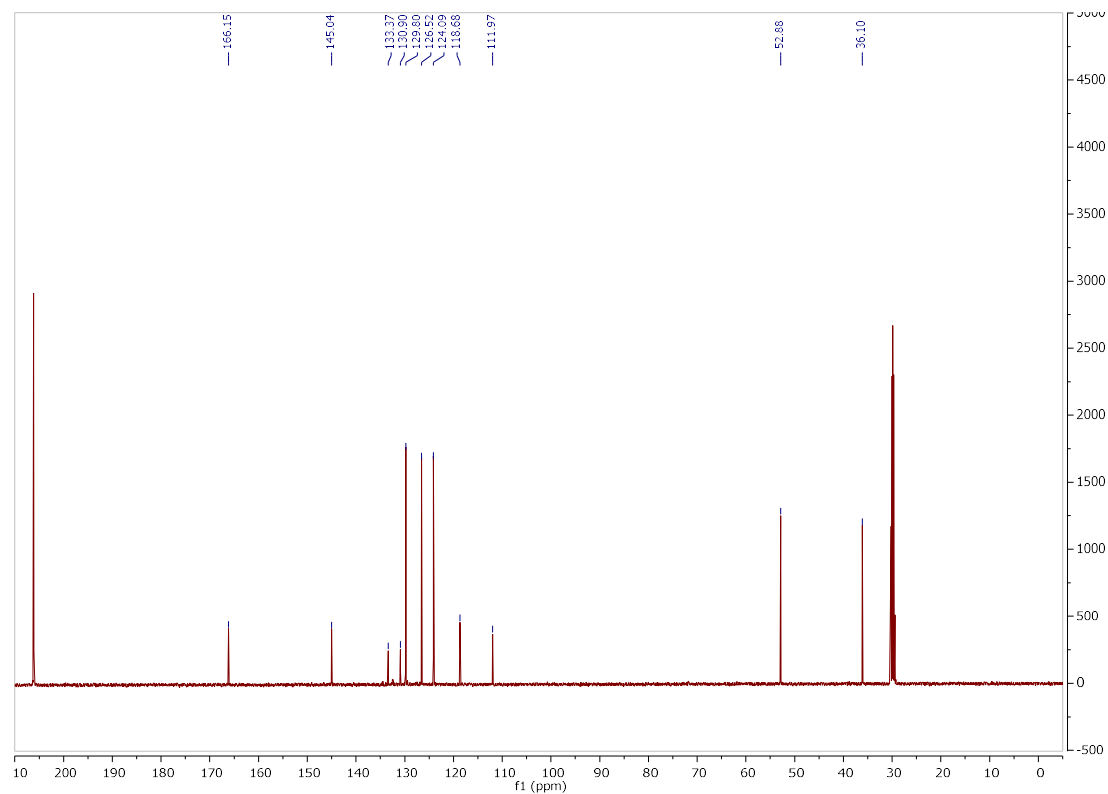



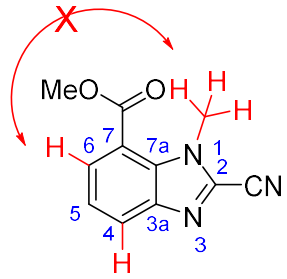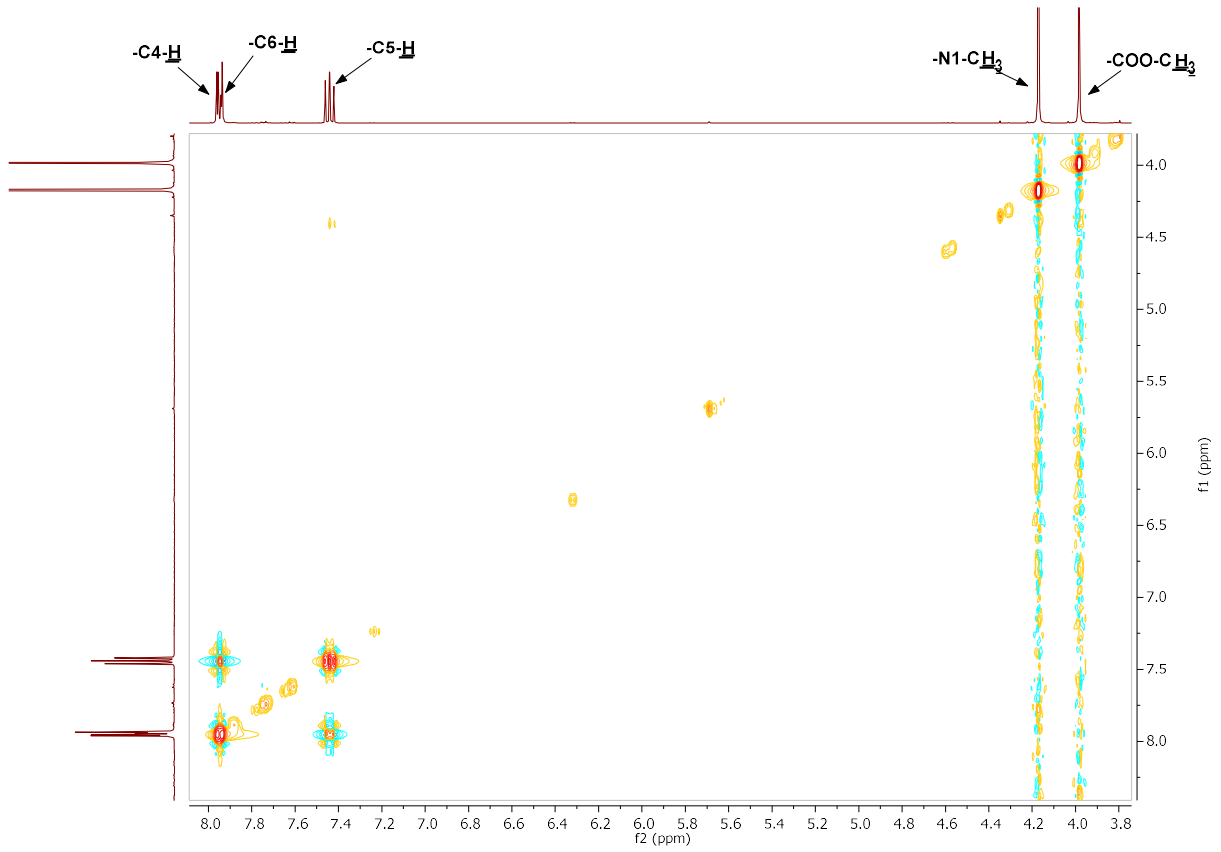

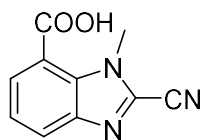

**Compound 45**

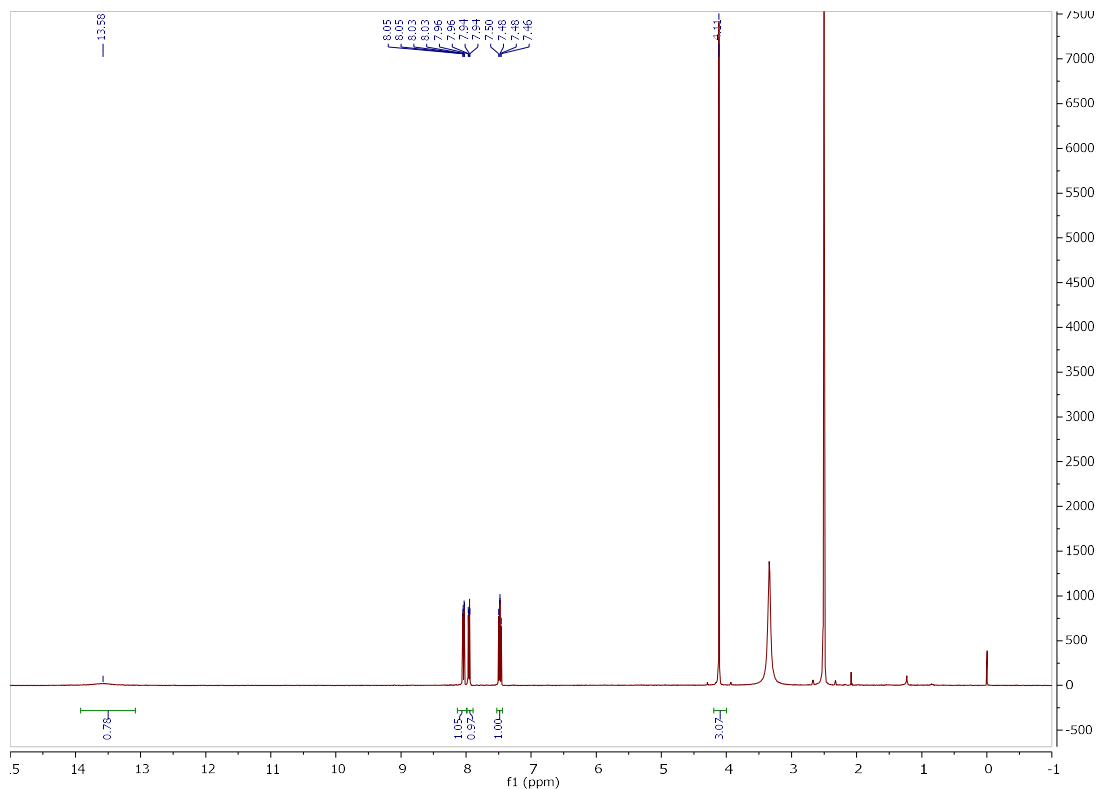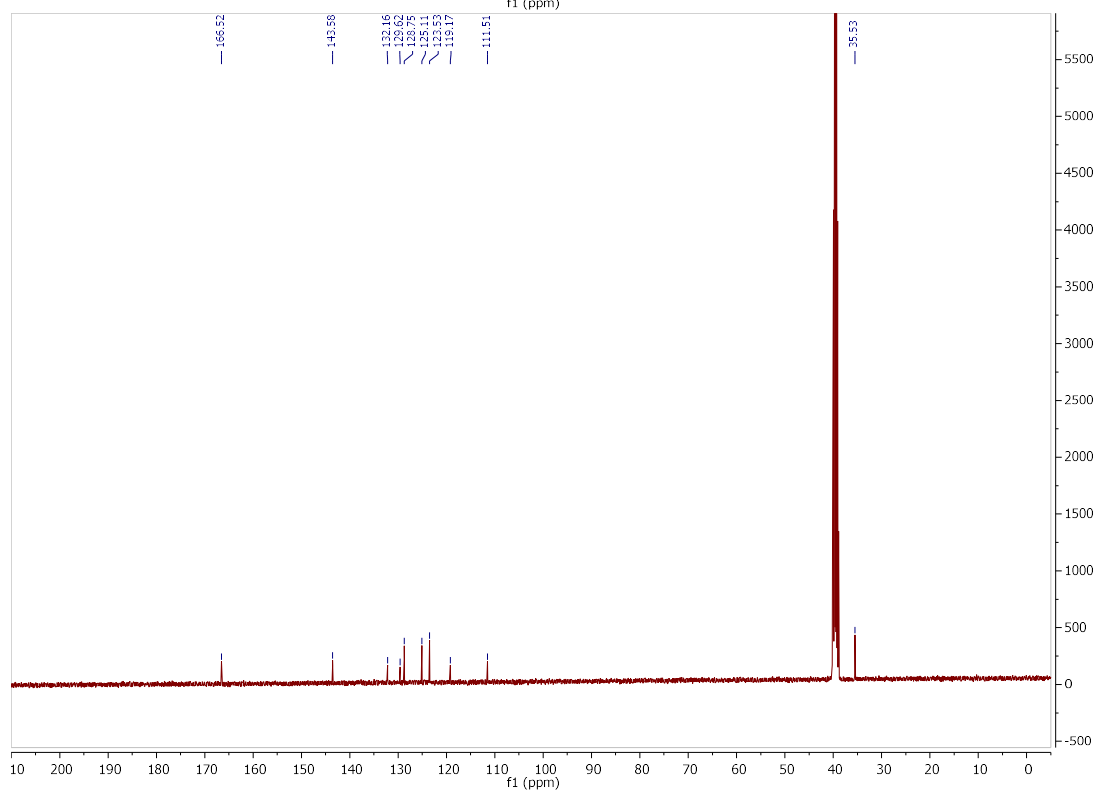

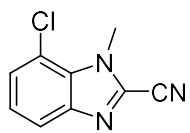

Compound 46

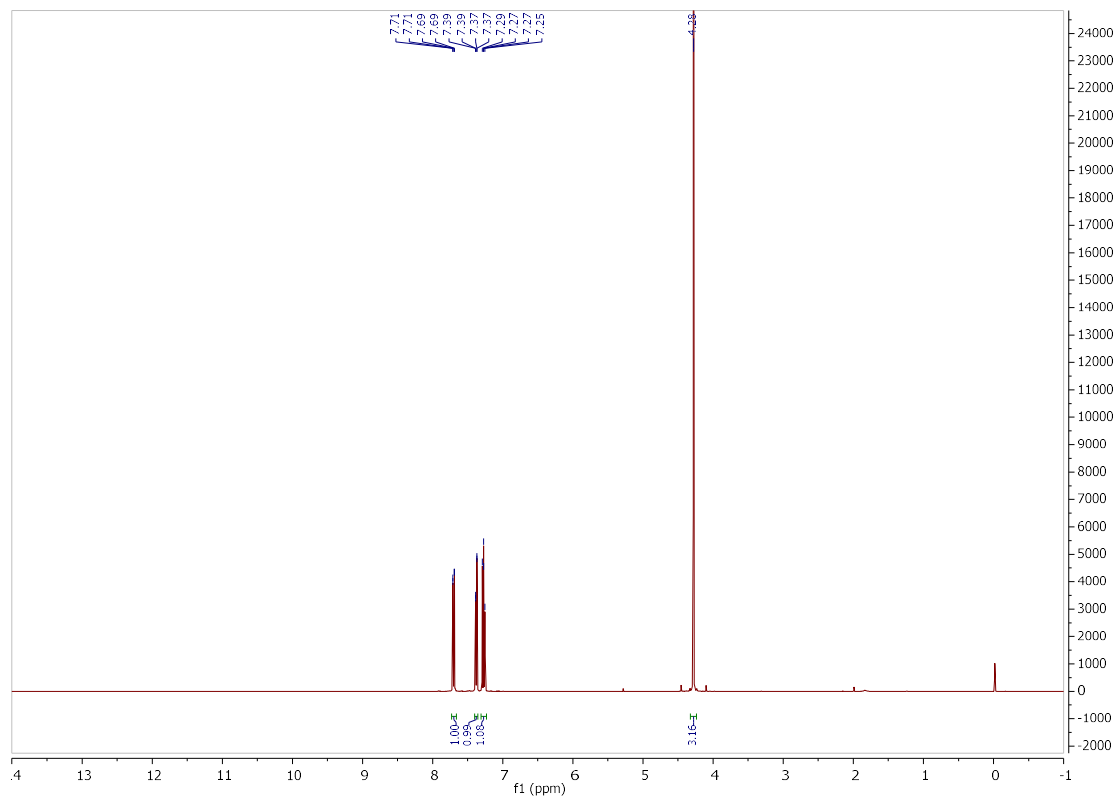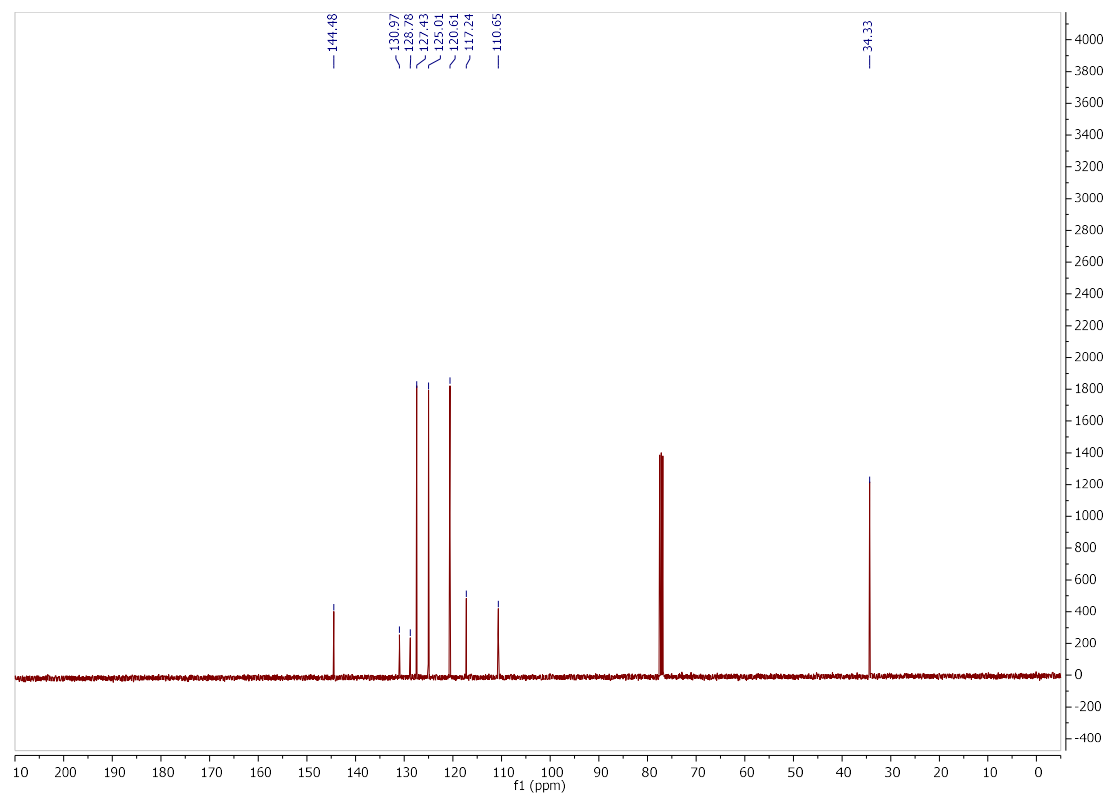

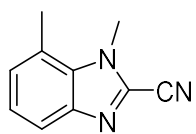

Compound 47

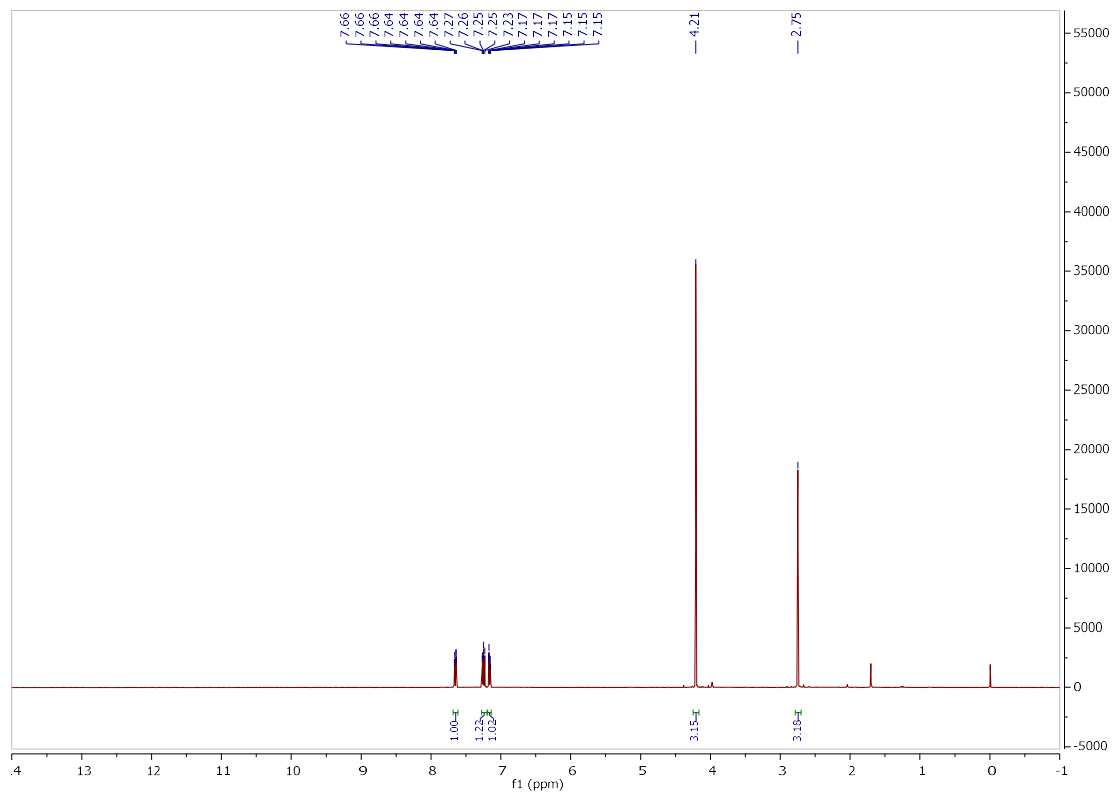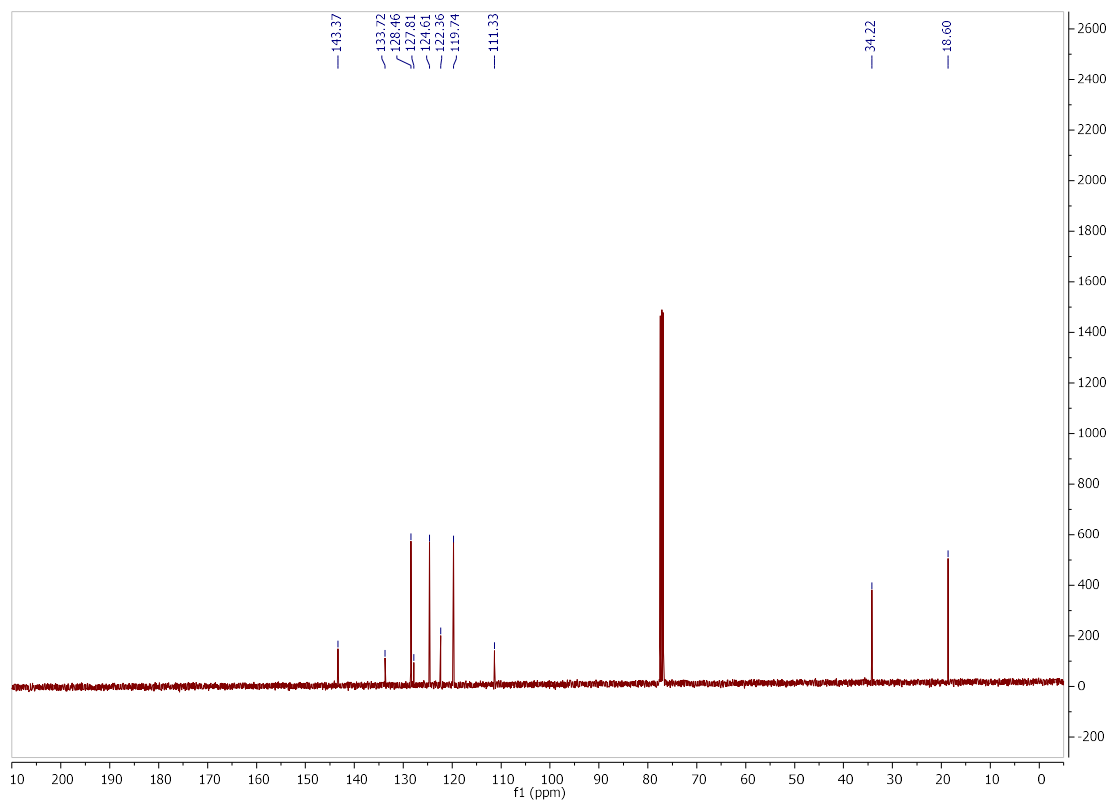

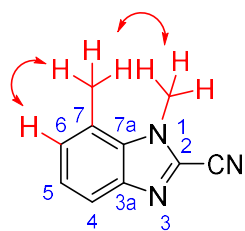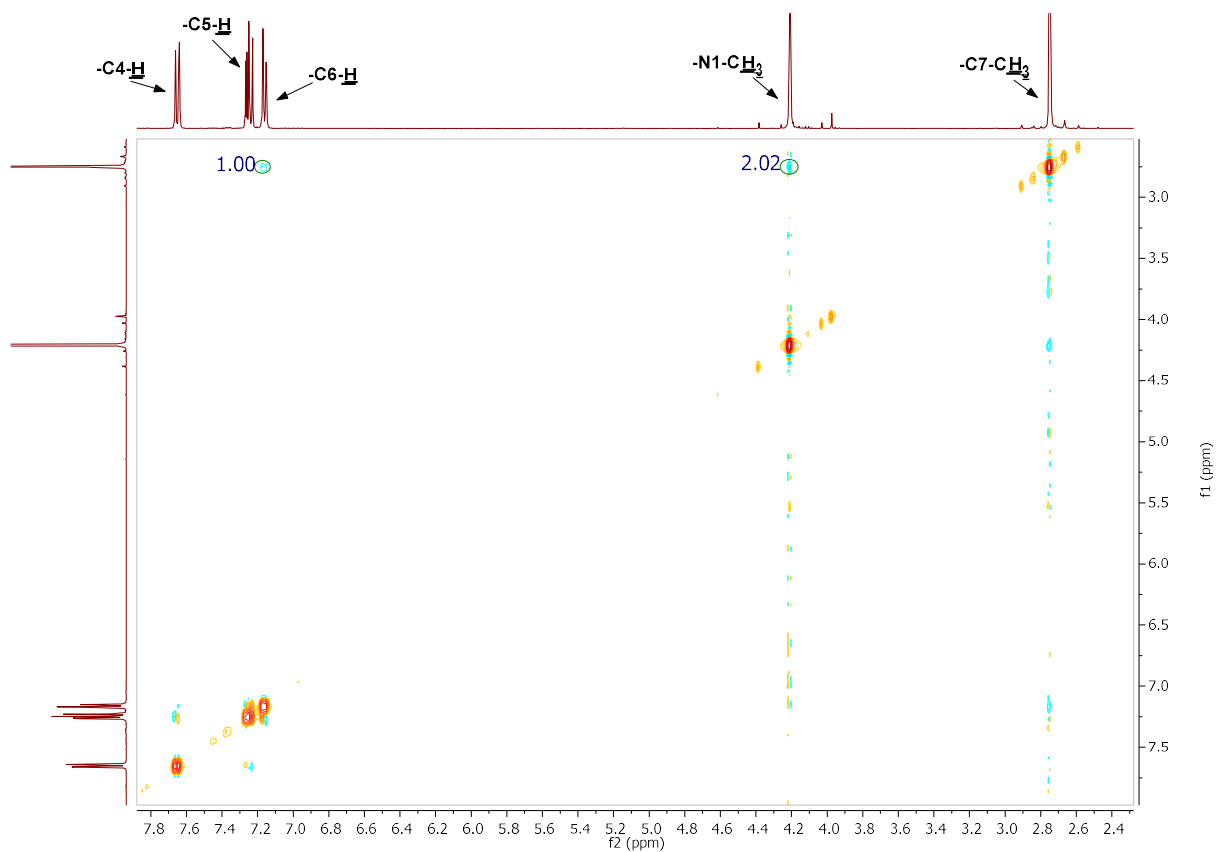

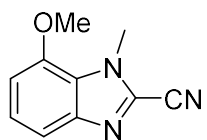

**Compound 48**

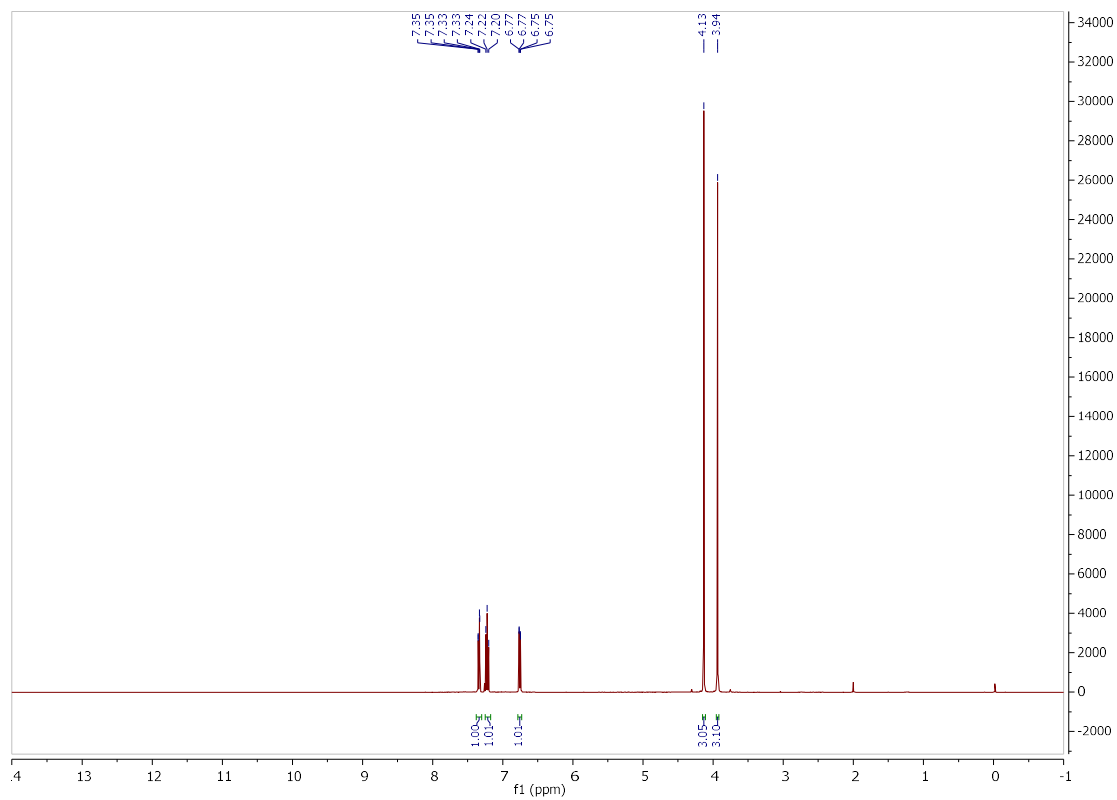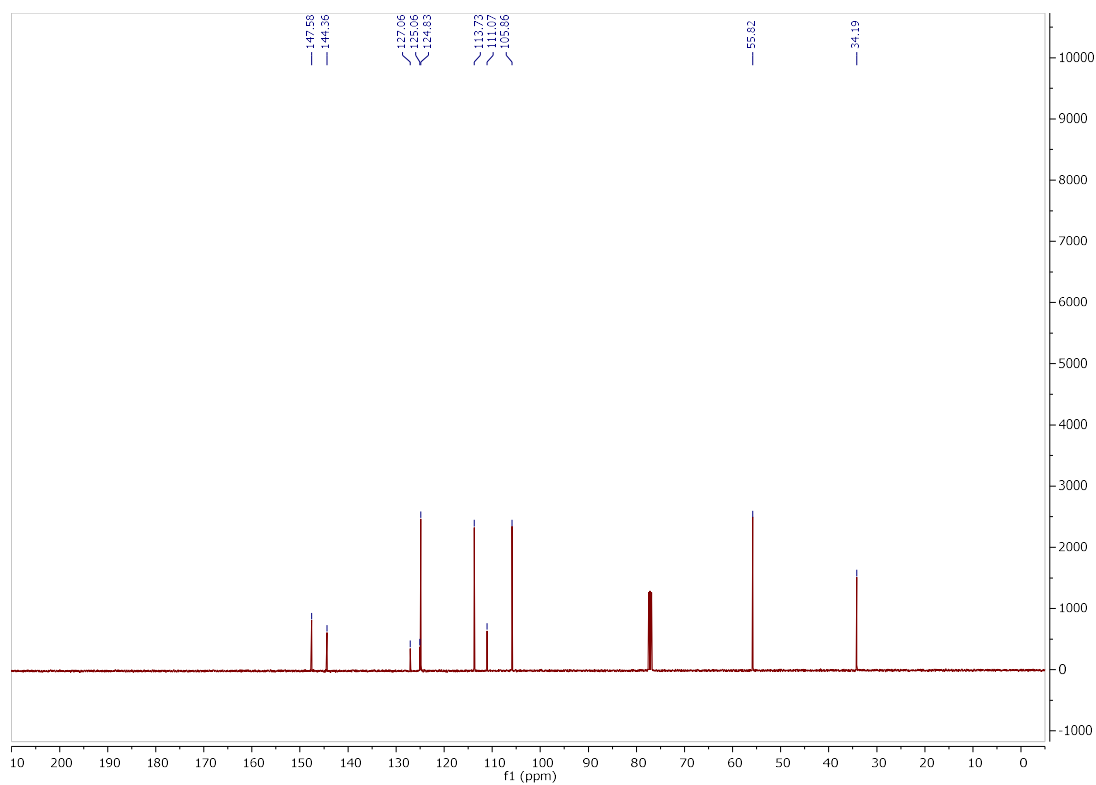

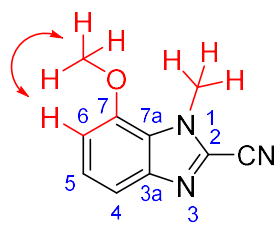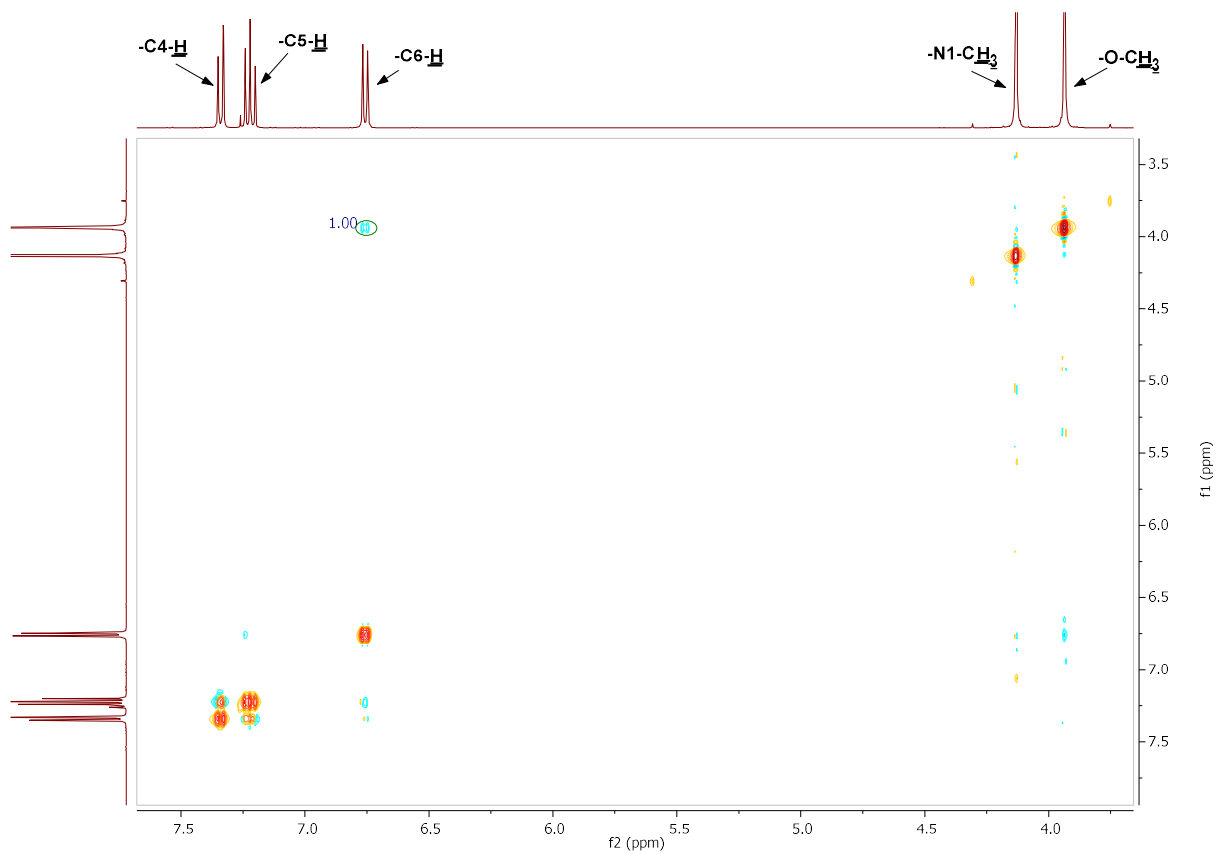

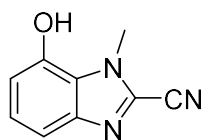

**Compound 49**

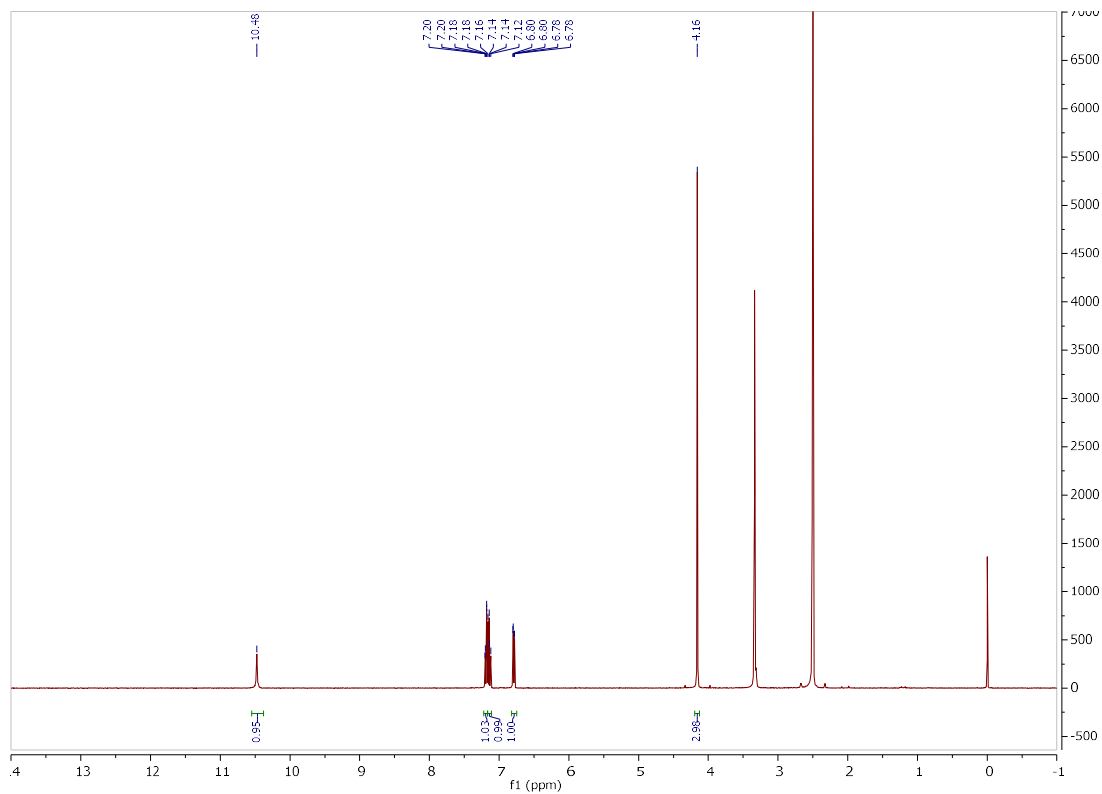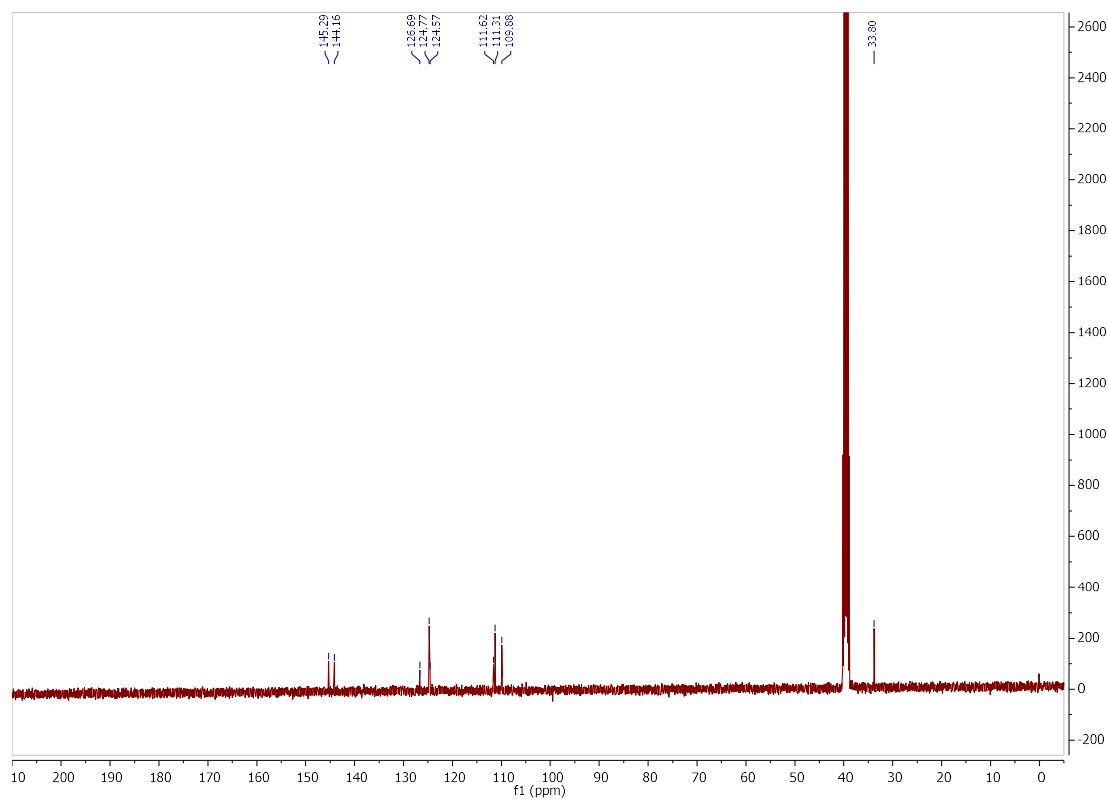



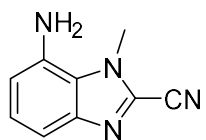

**Compound 50**

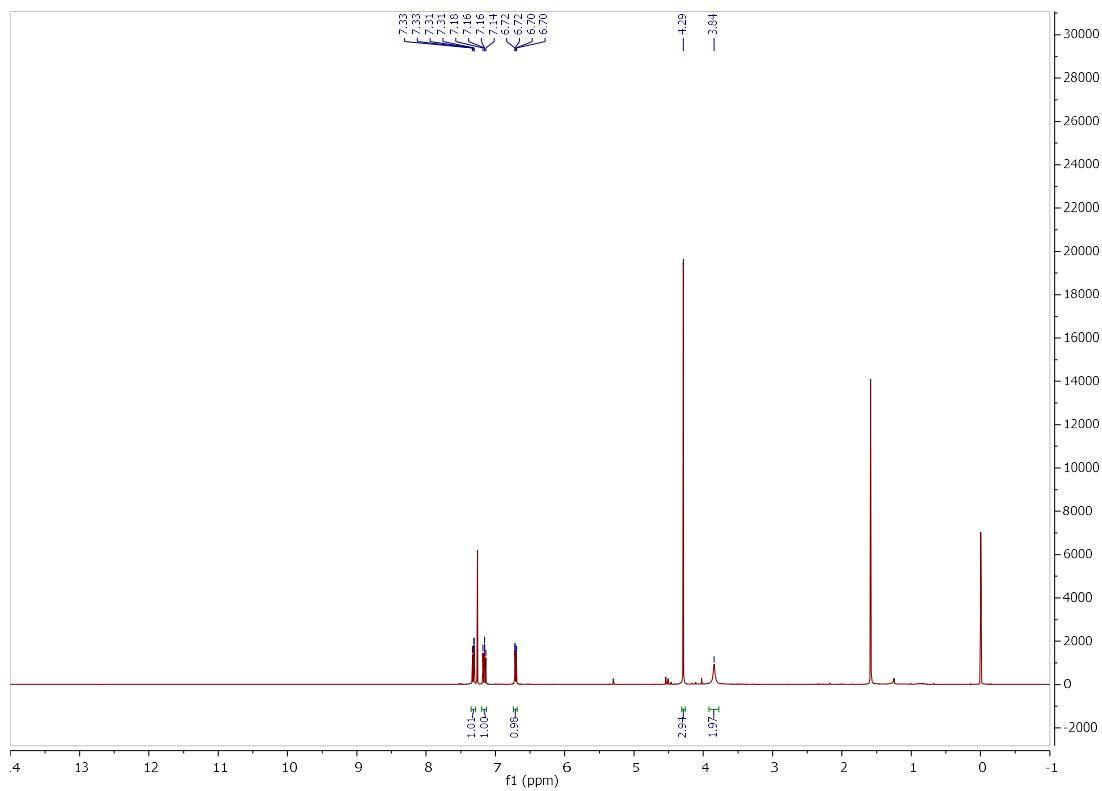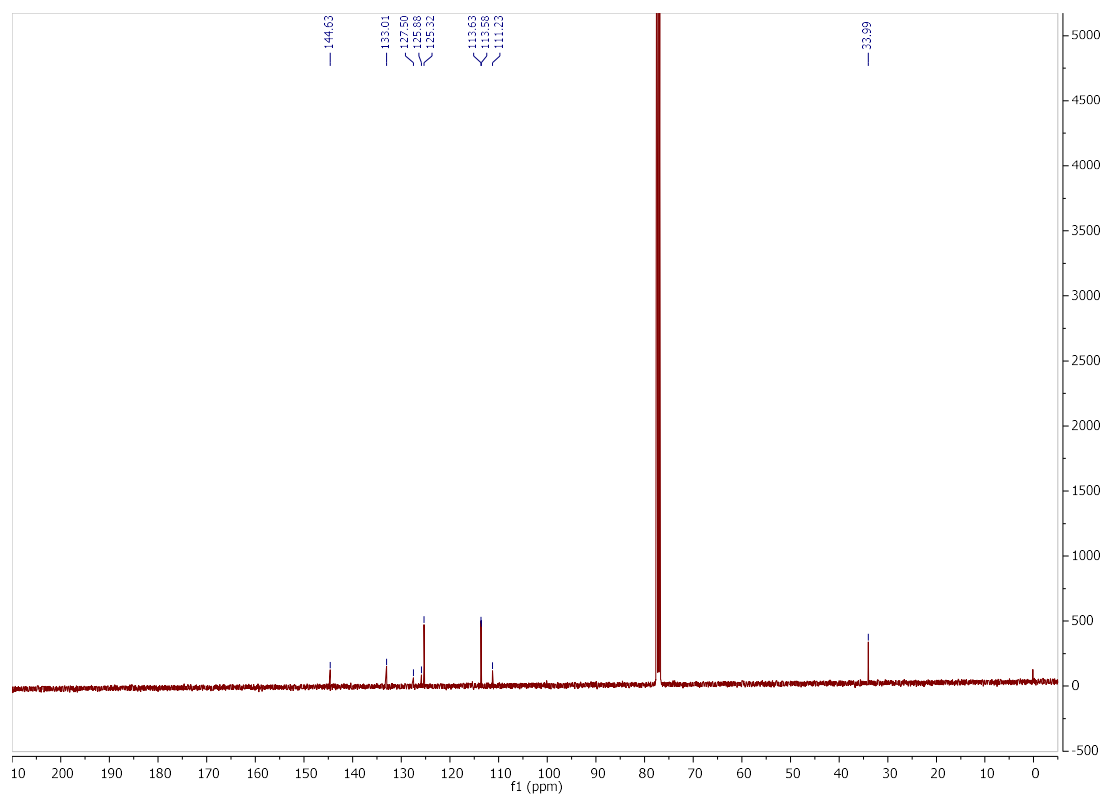

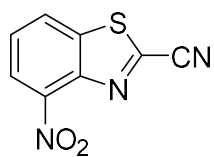

**Compound 52**

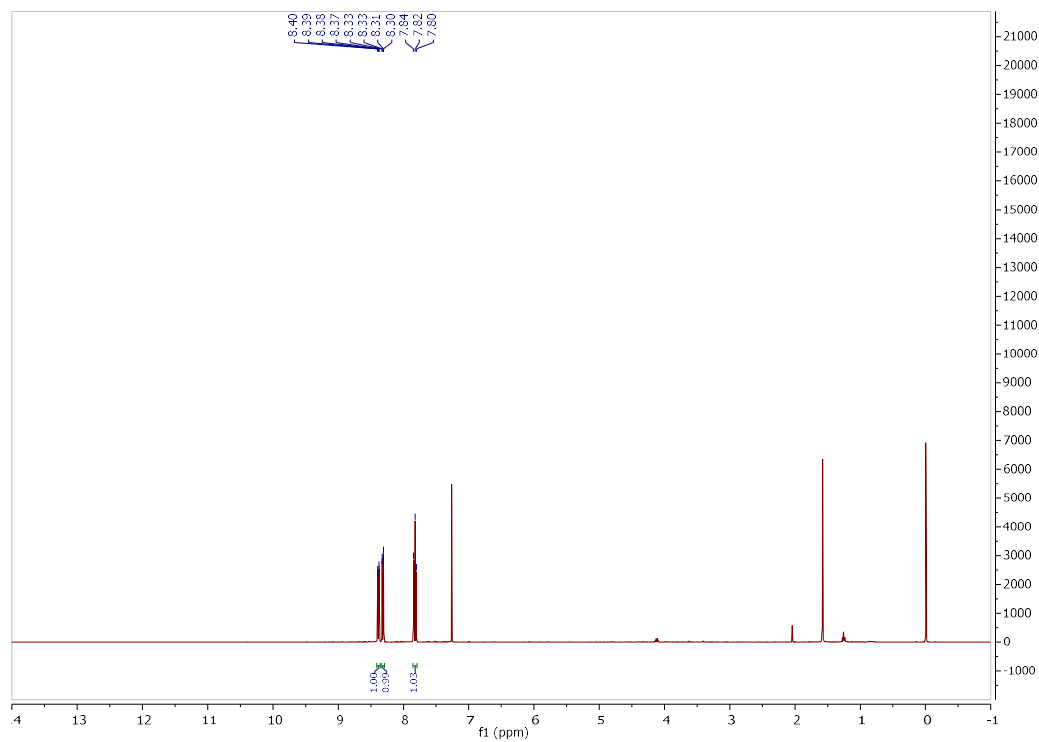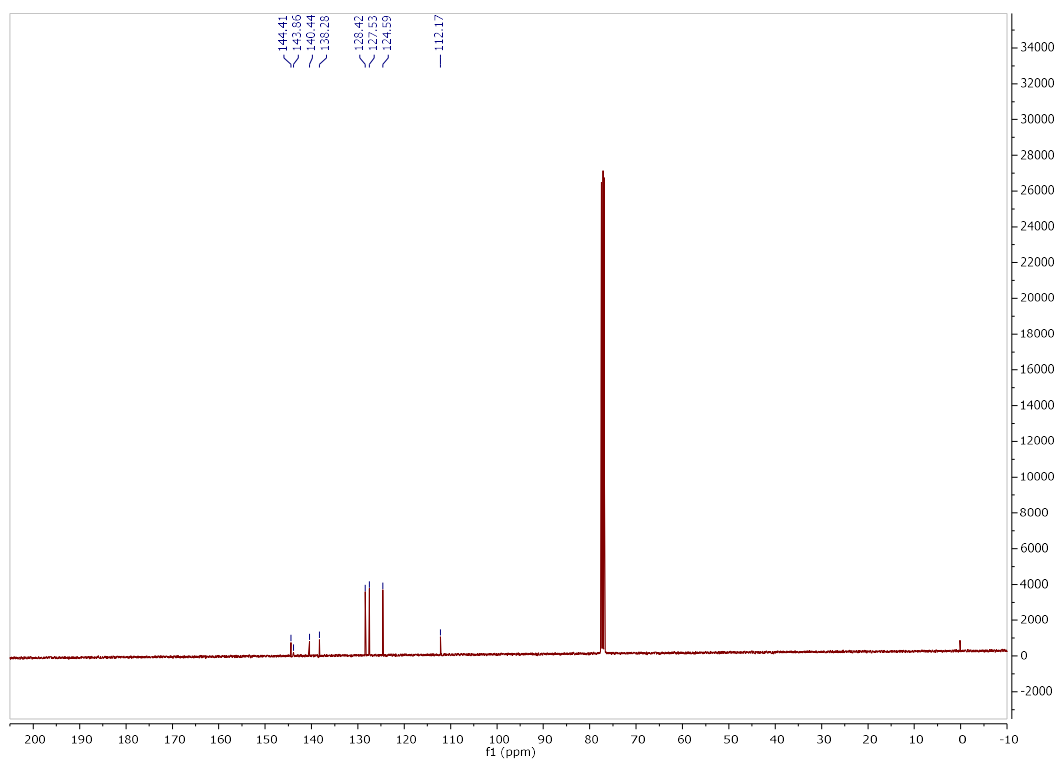

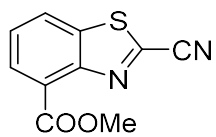

**Compound 53**

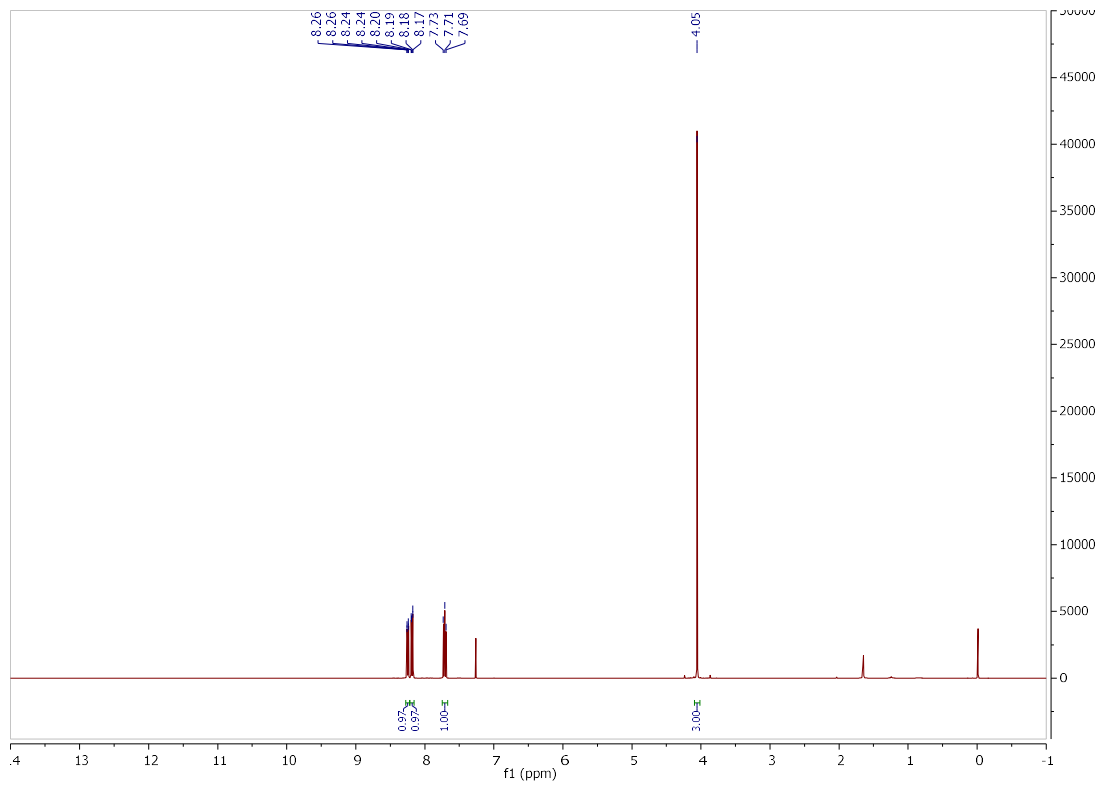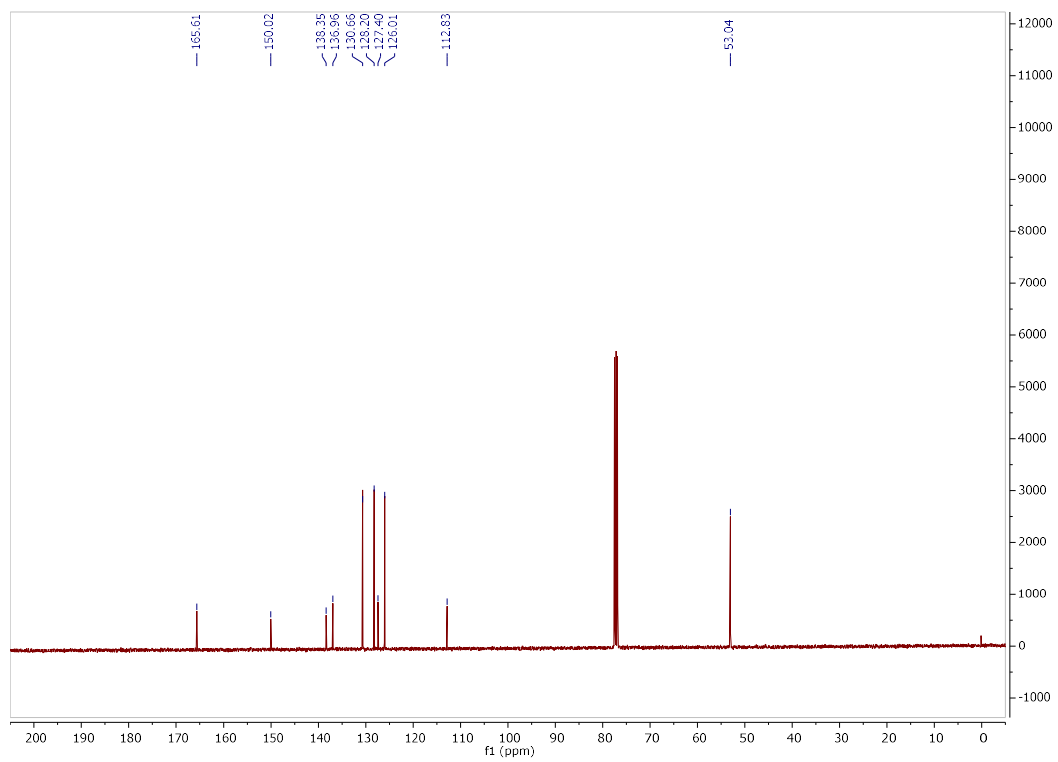

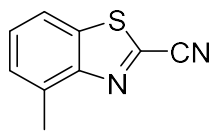

Compound 56

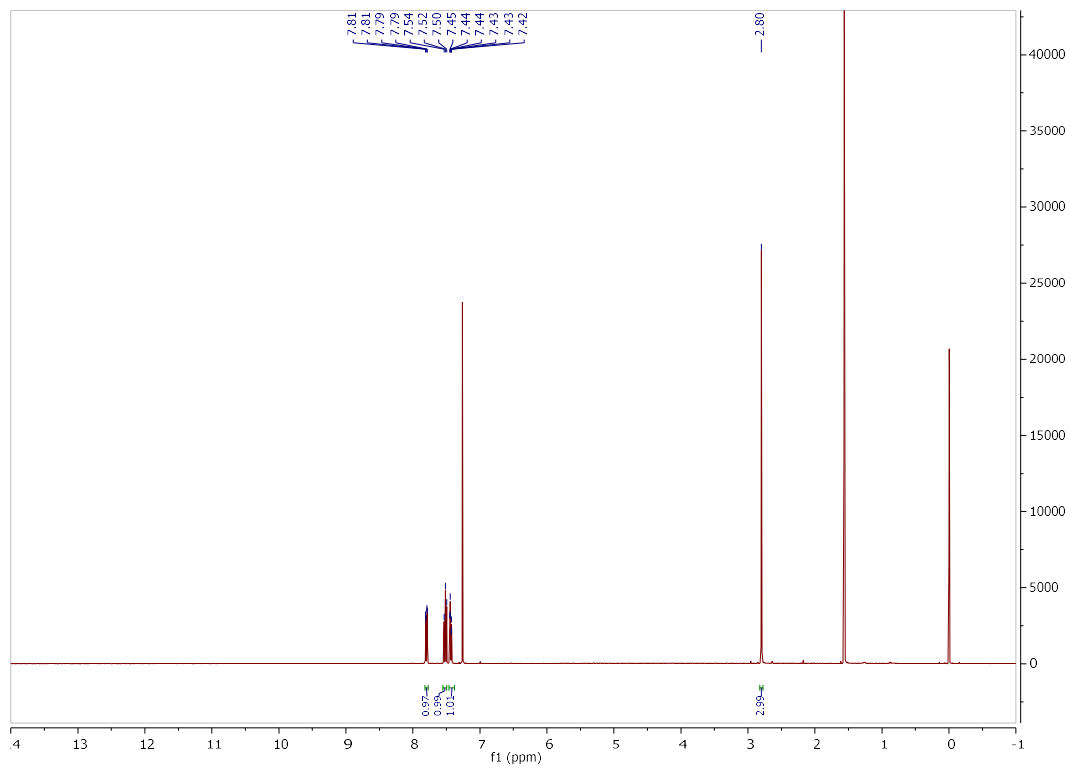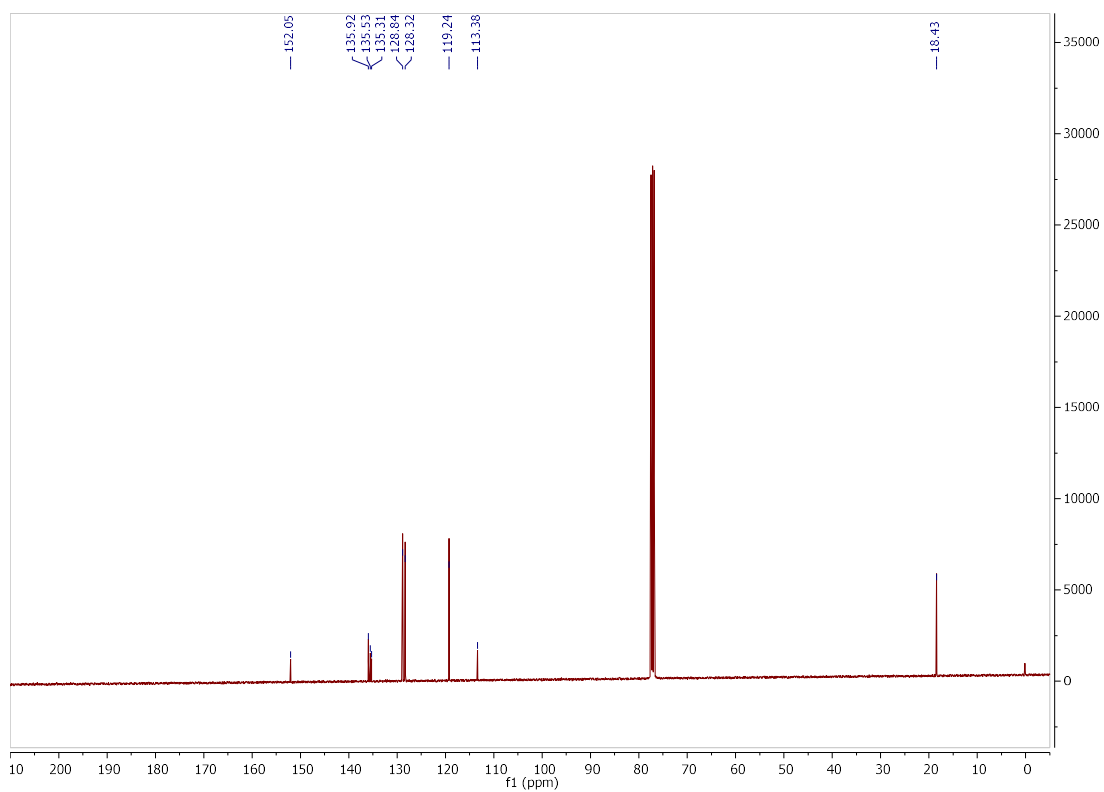

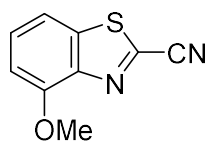

**Compound 57**

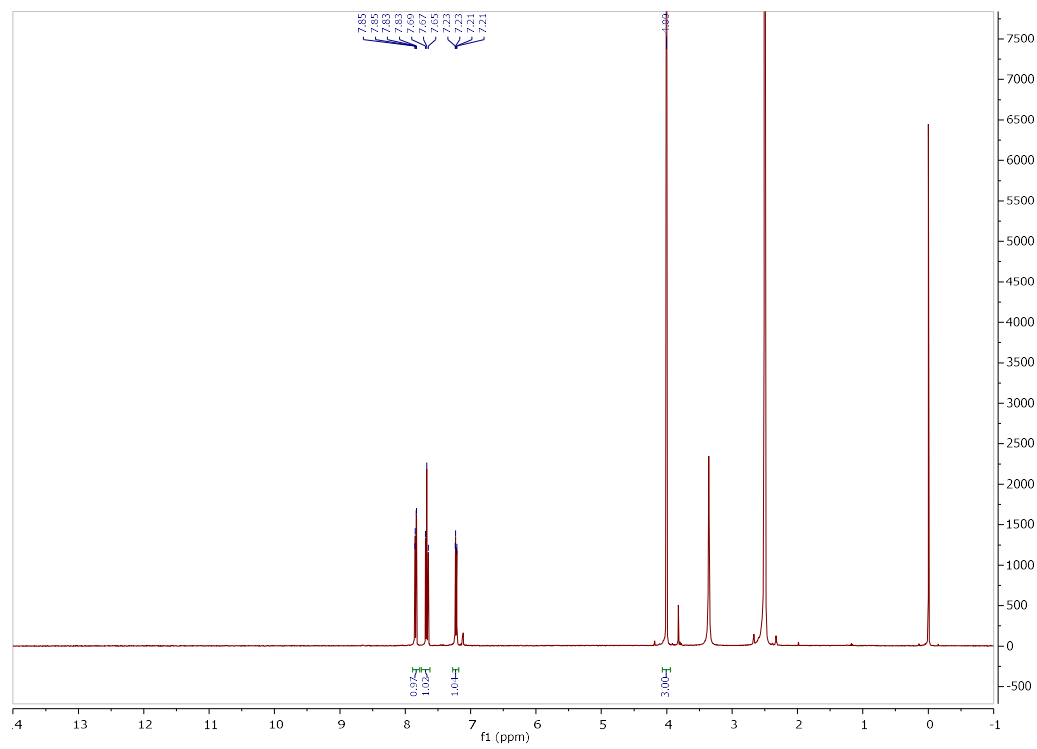

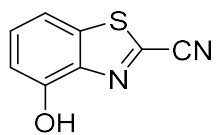

**Compound 58**

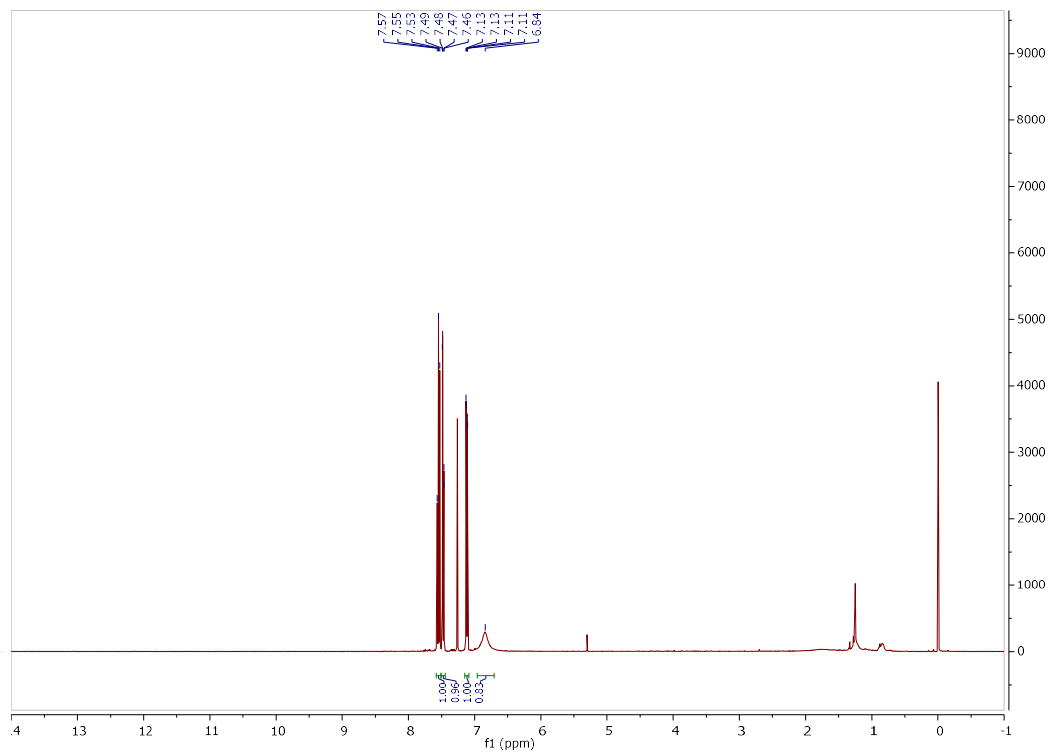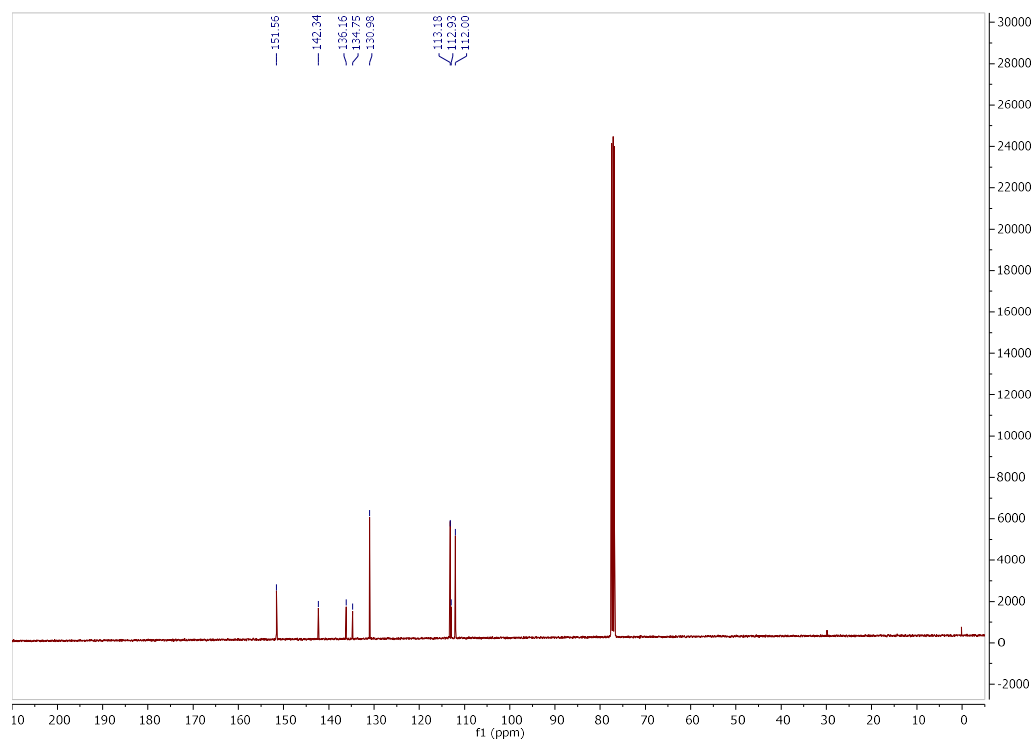

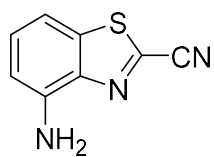

**Compound 59**

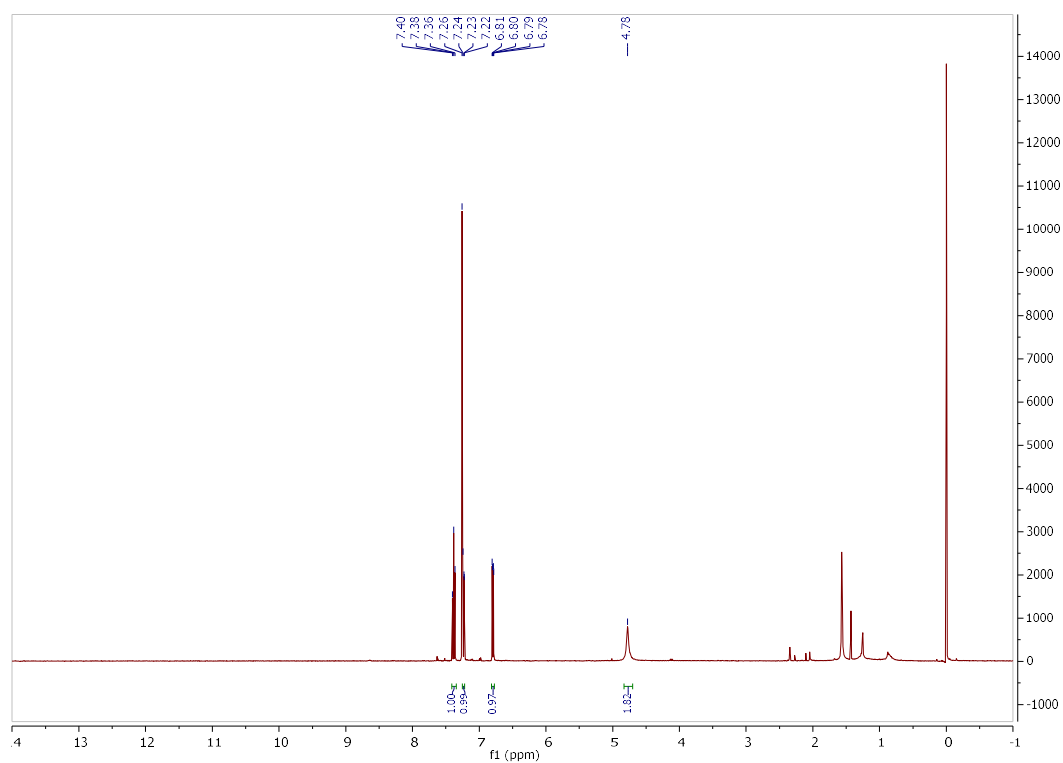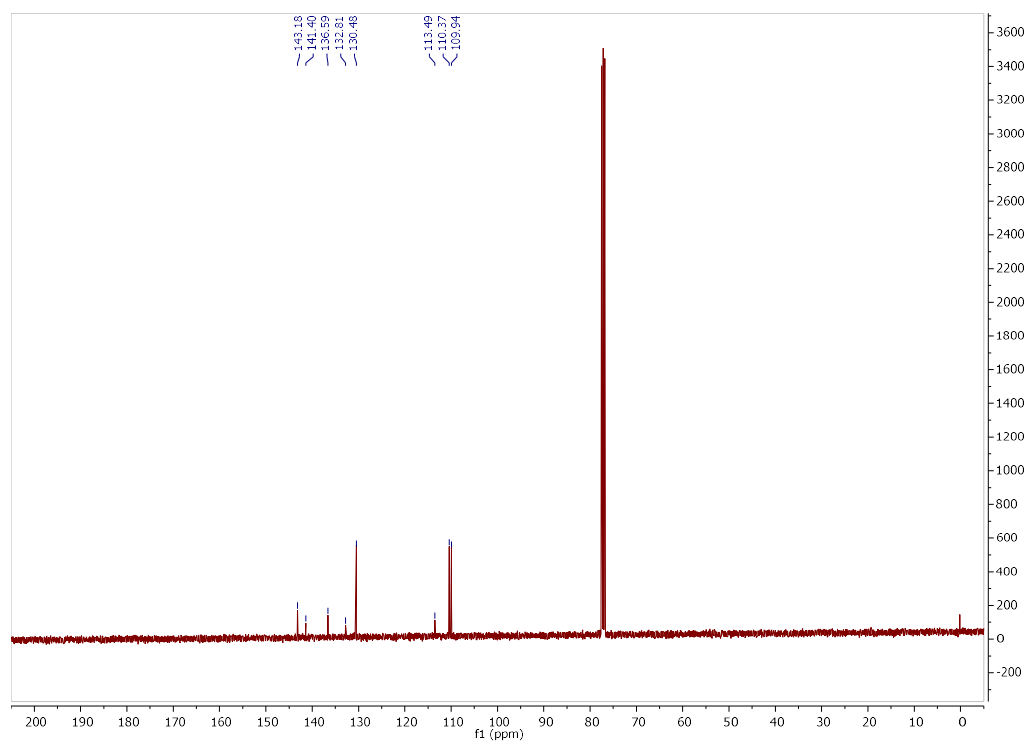

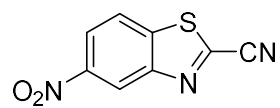

**Compound 60**

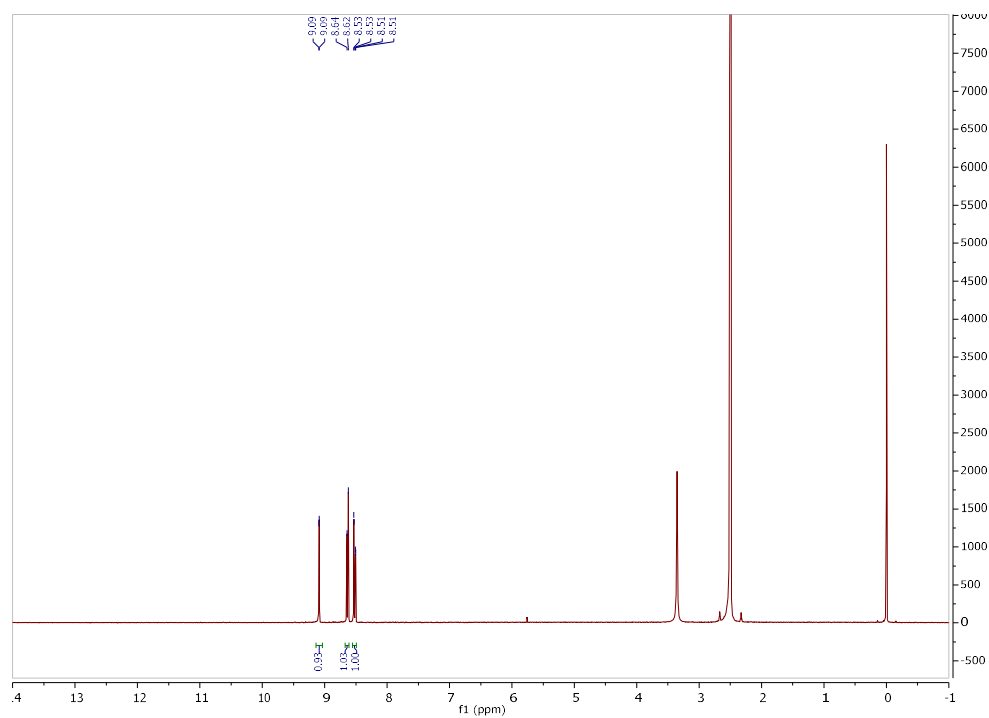



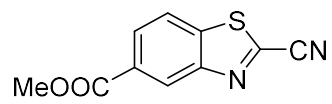

Compound 61

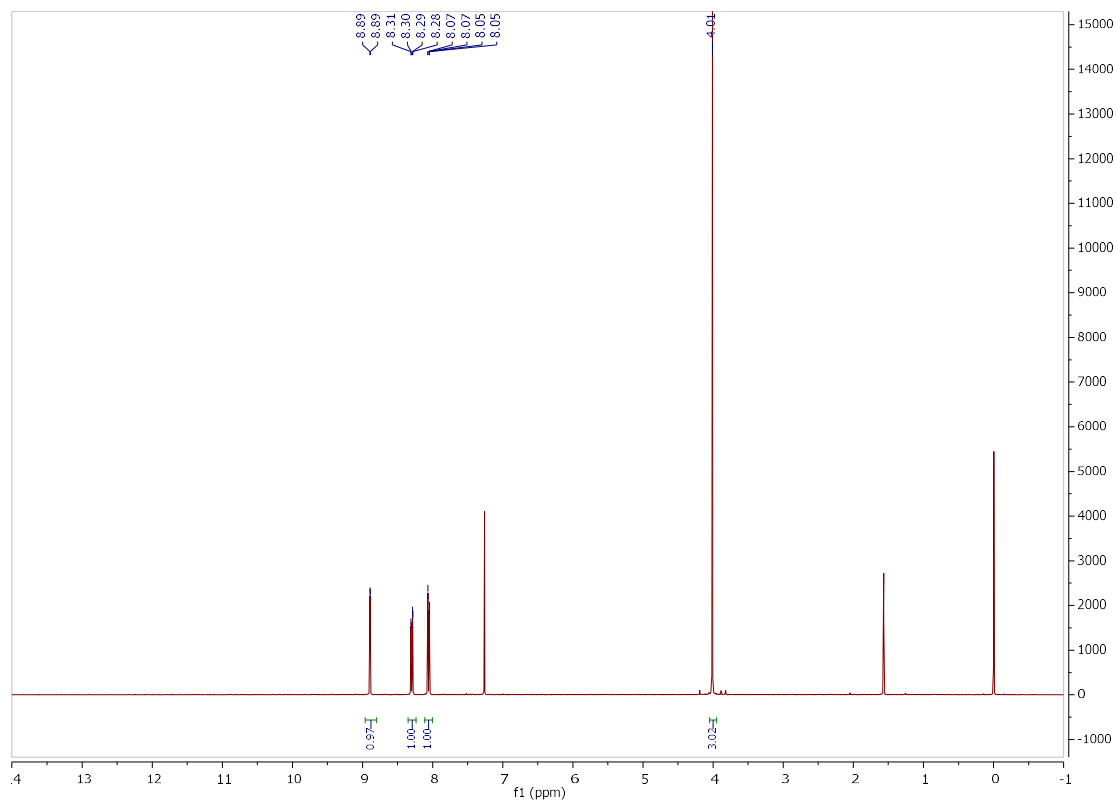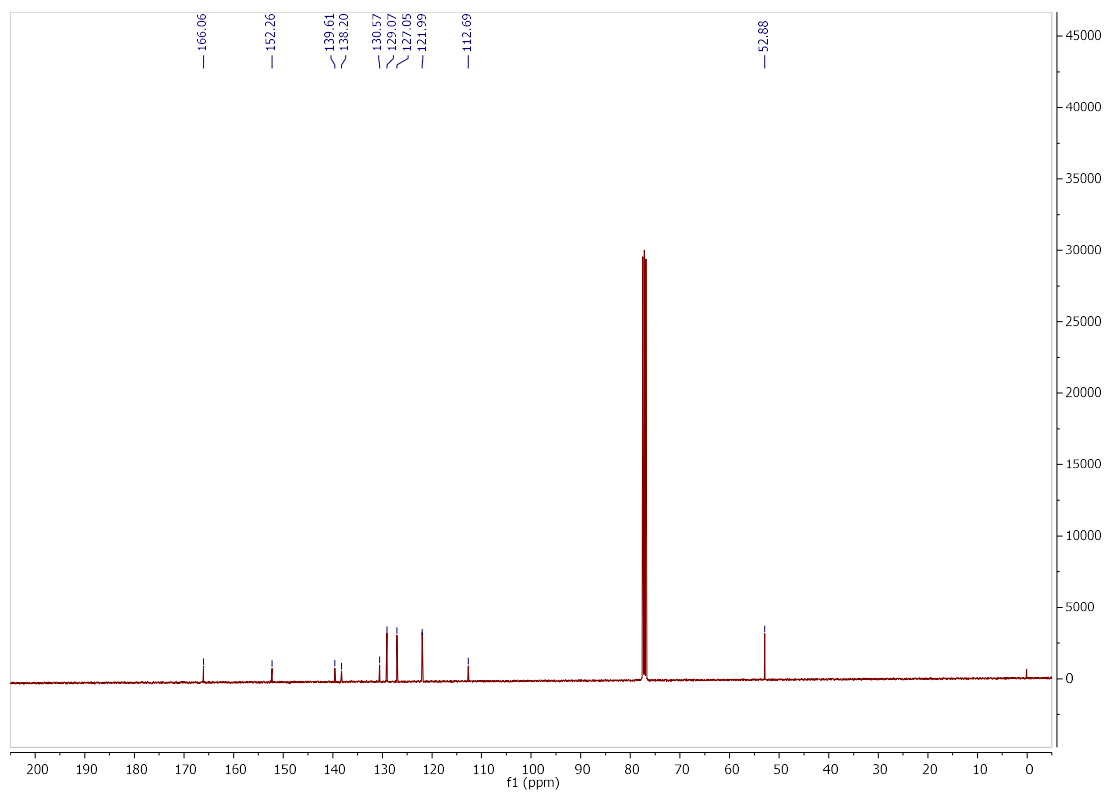

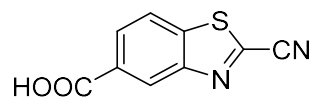

Compound 62

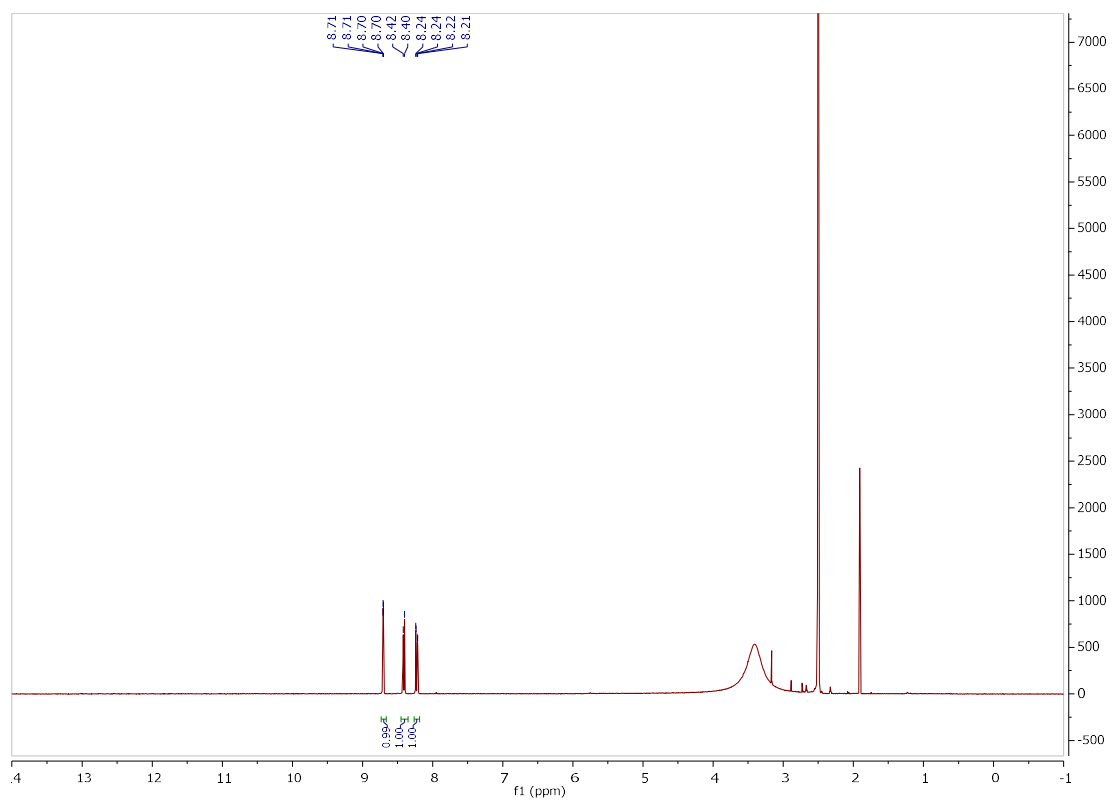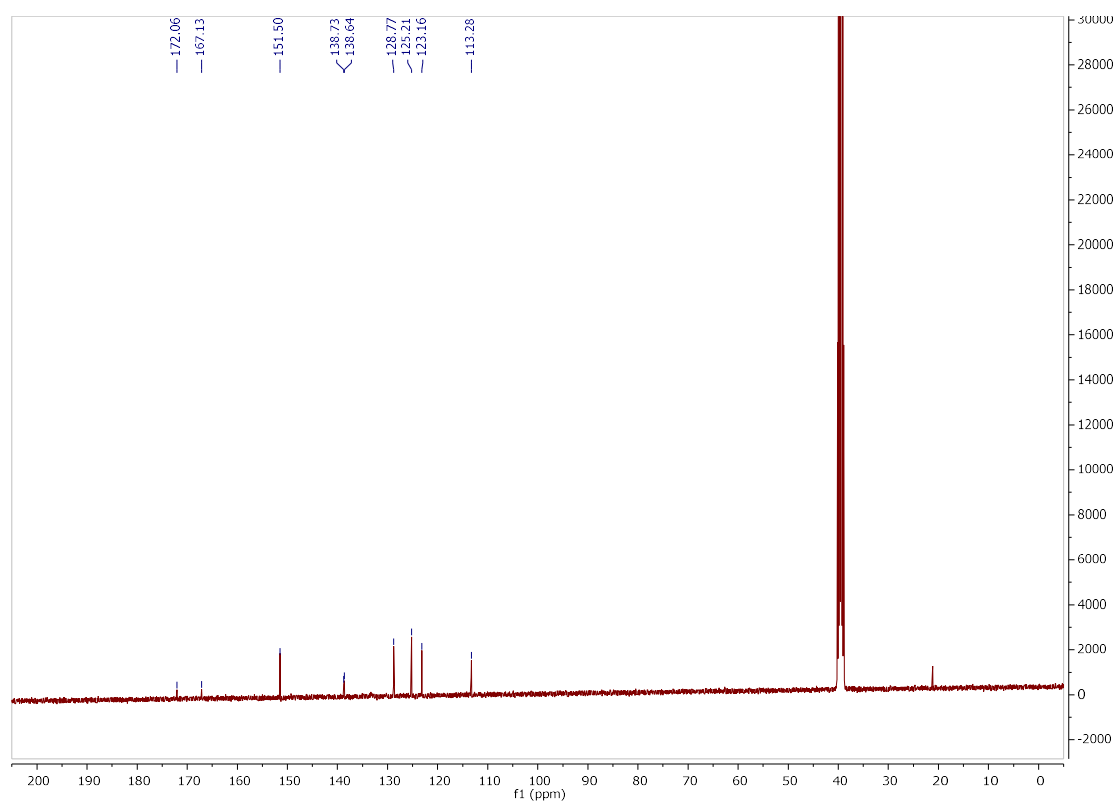

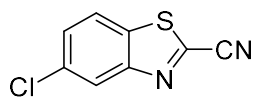

**Compound 63**

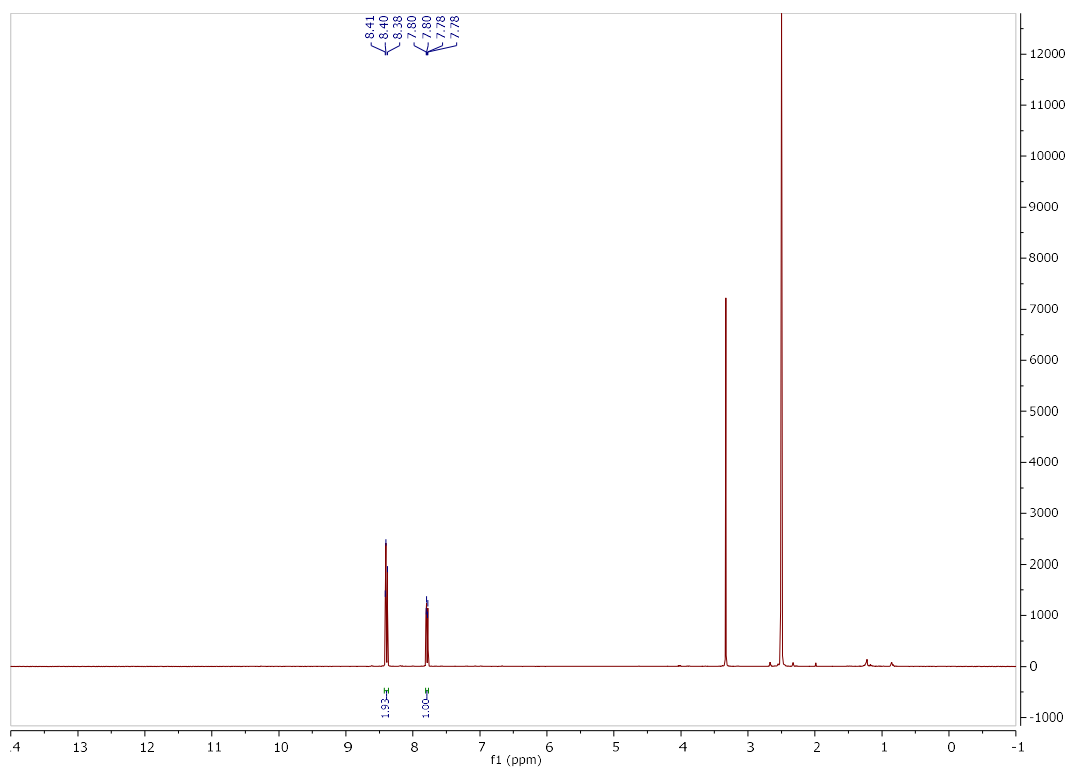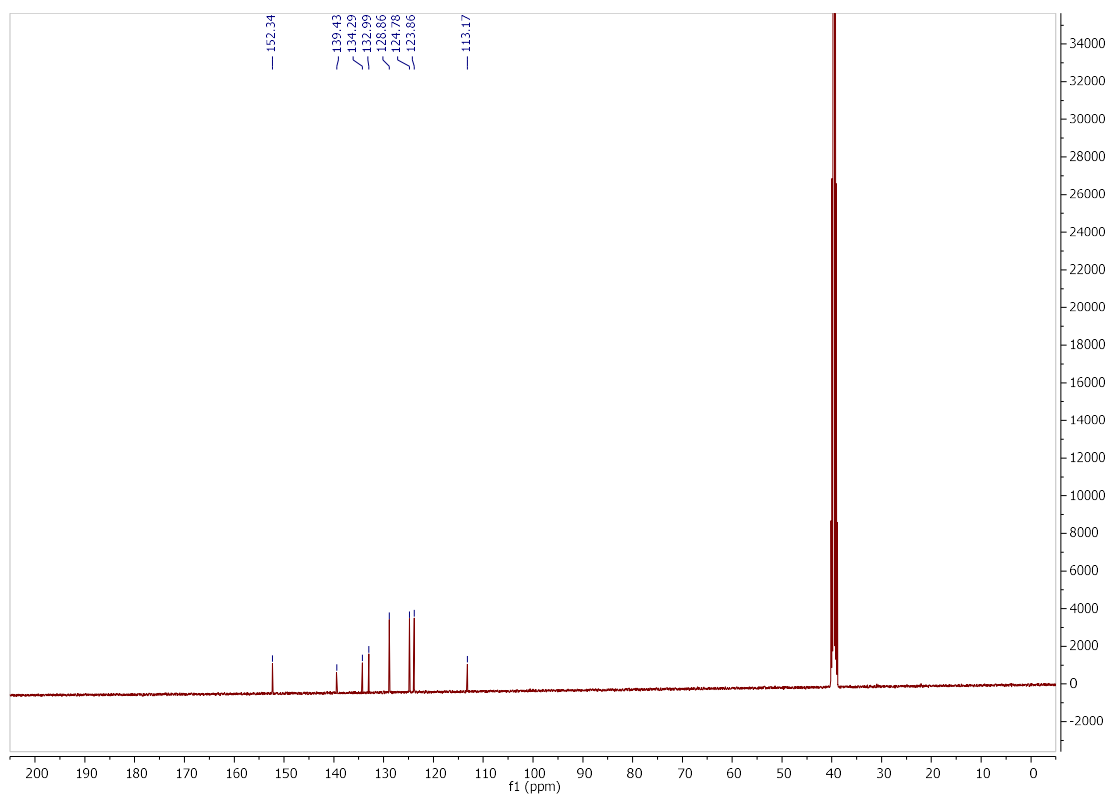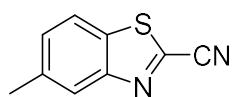

## Compound 64

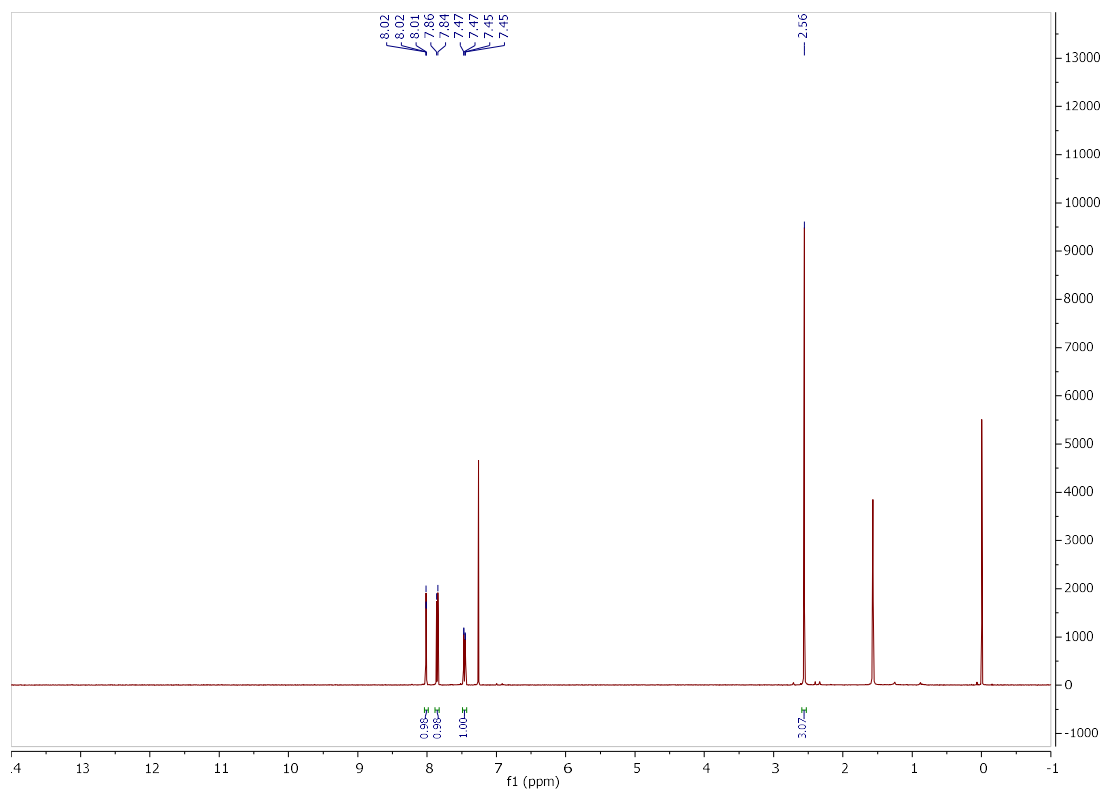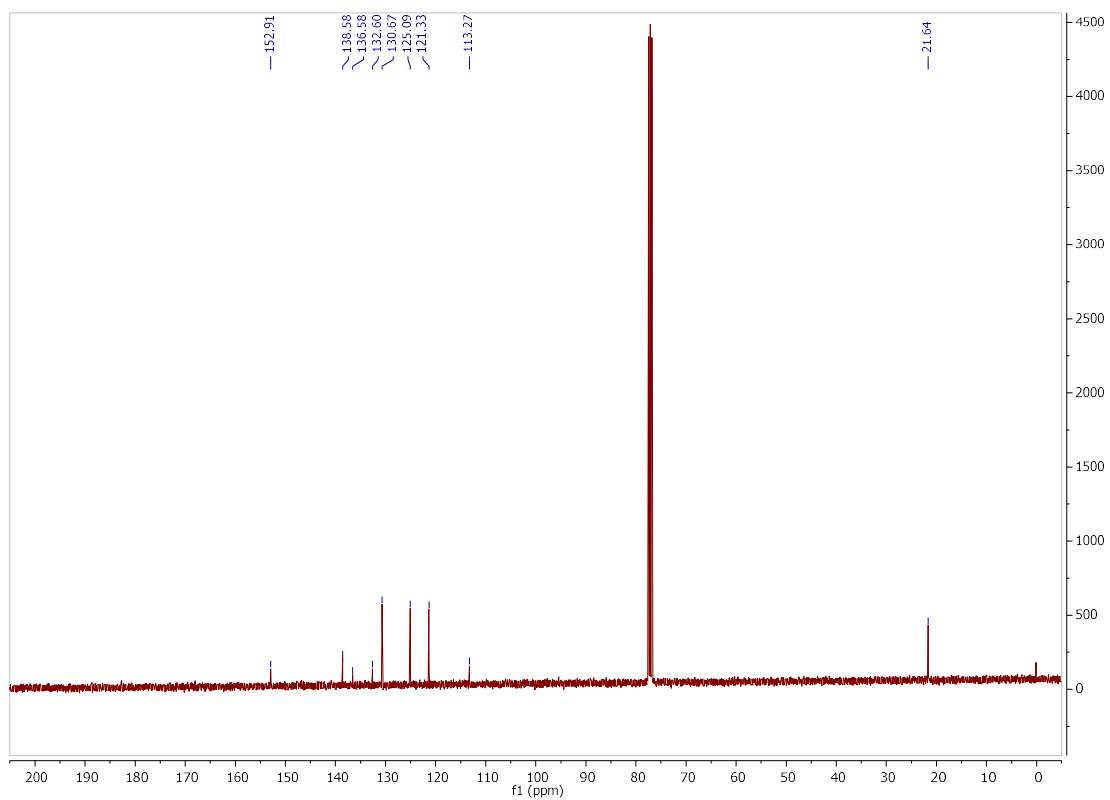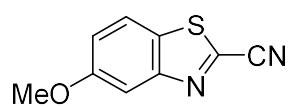

## Compound 65

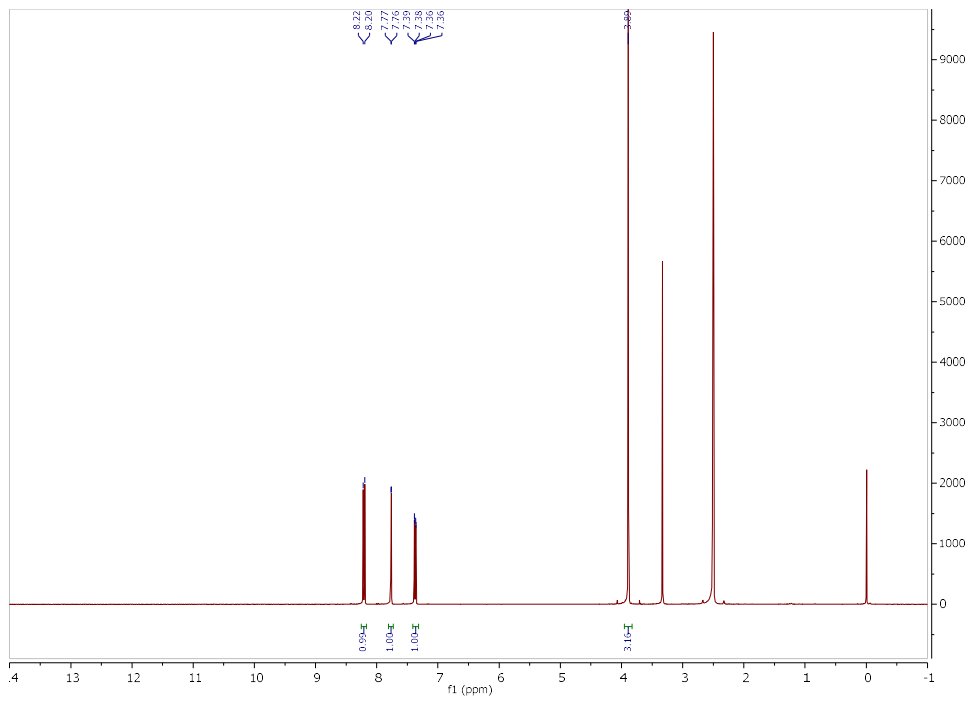

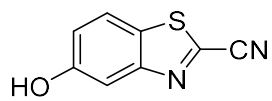

Compound 66

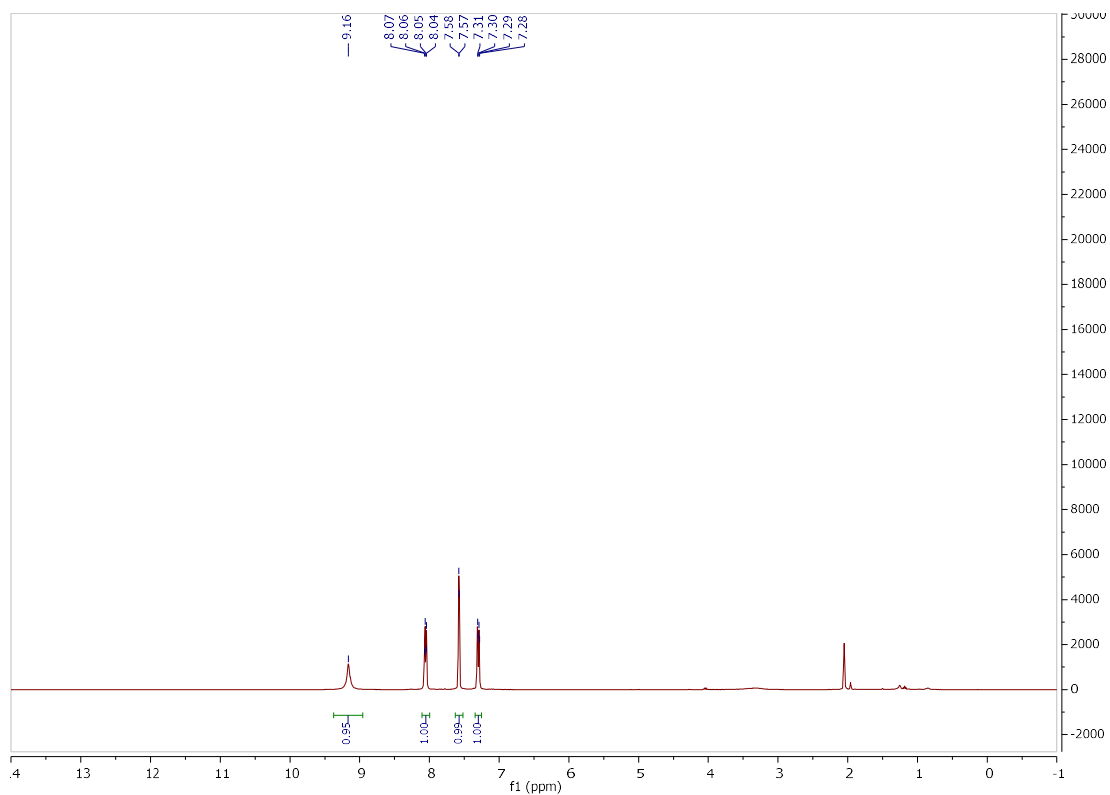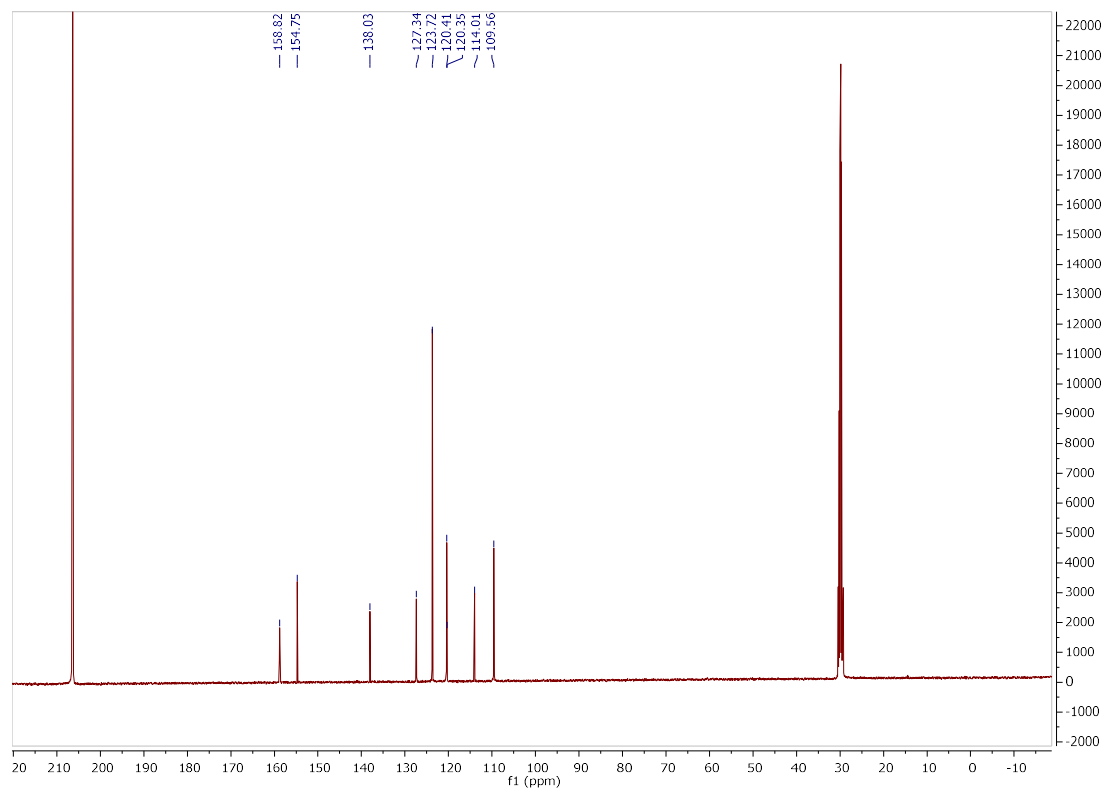

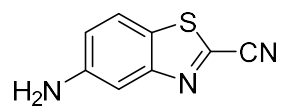

**Compound 67**

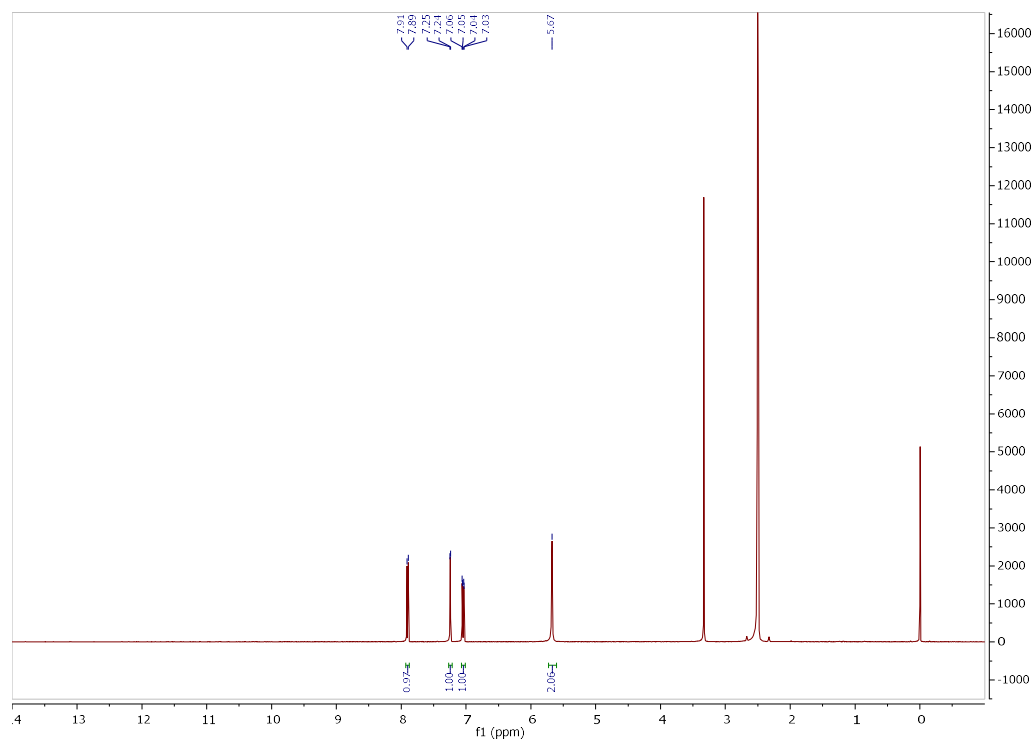

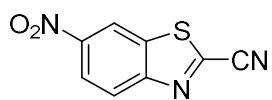

Compound 68

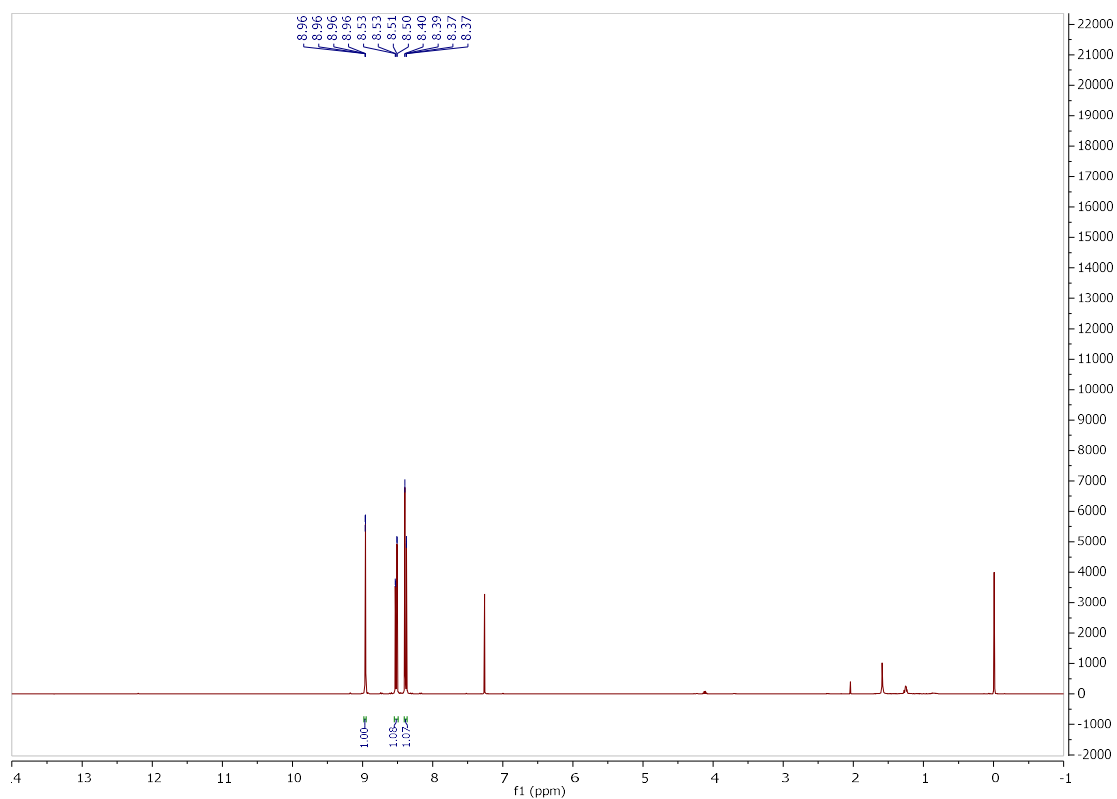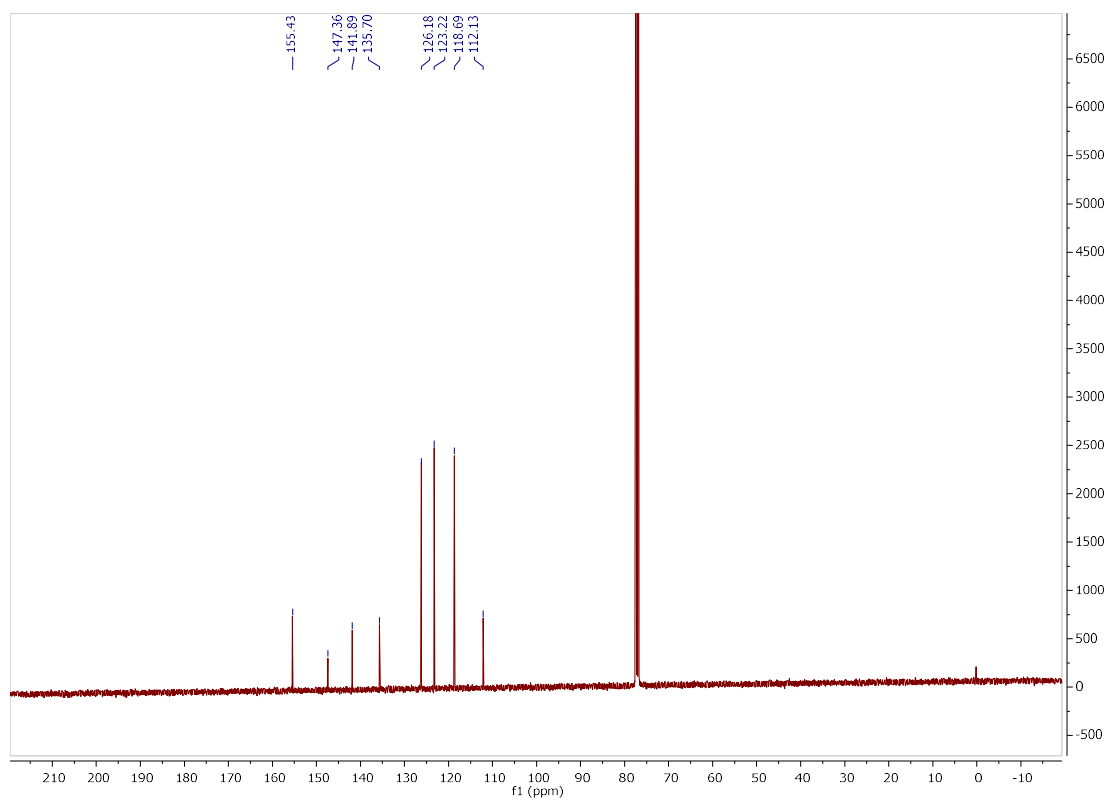



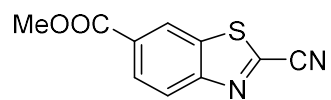

**Compound 69**

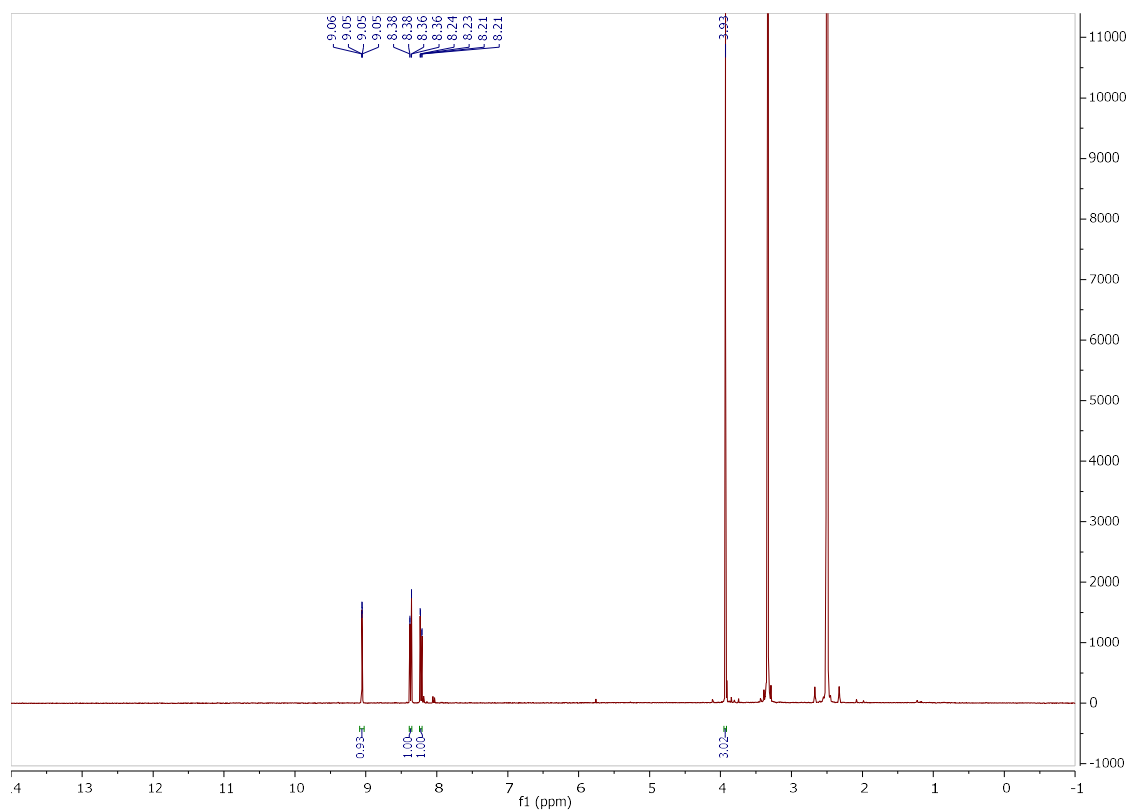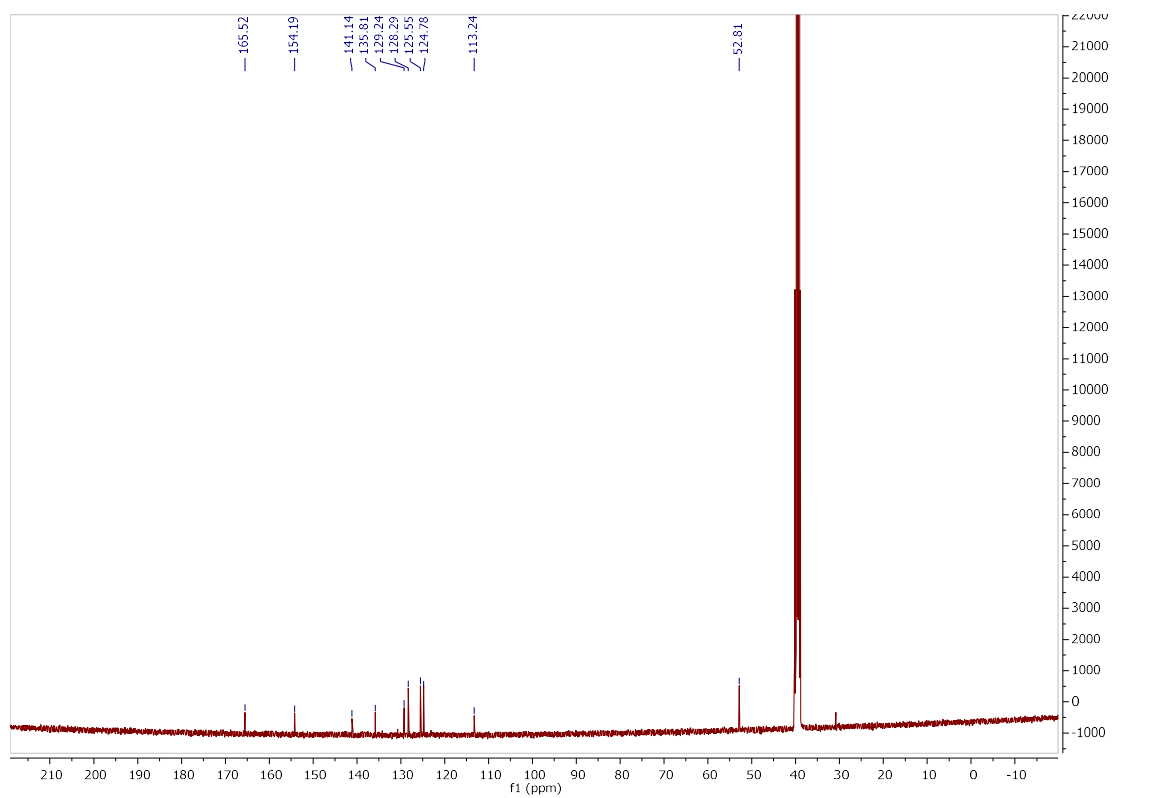

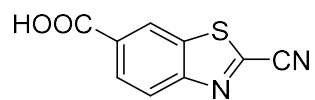

**Compound 70**

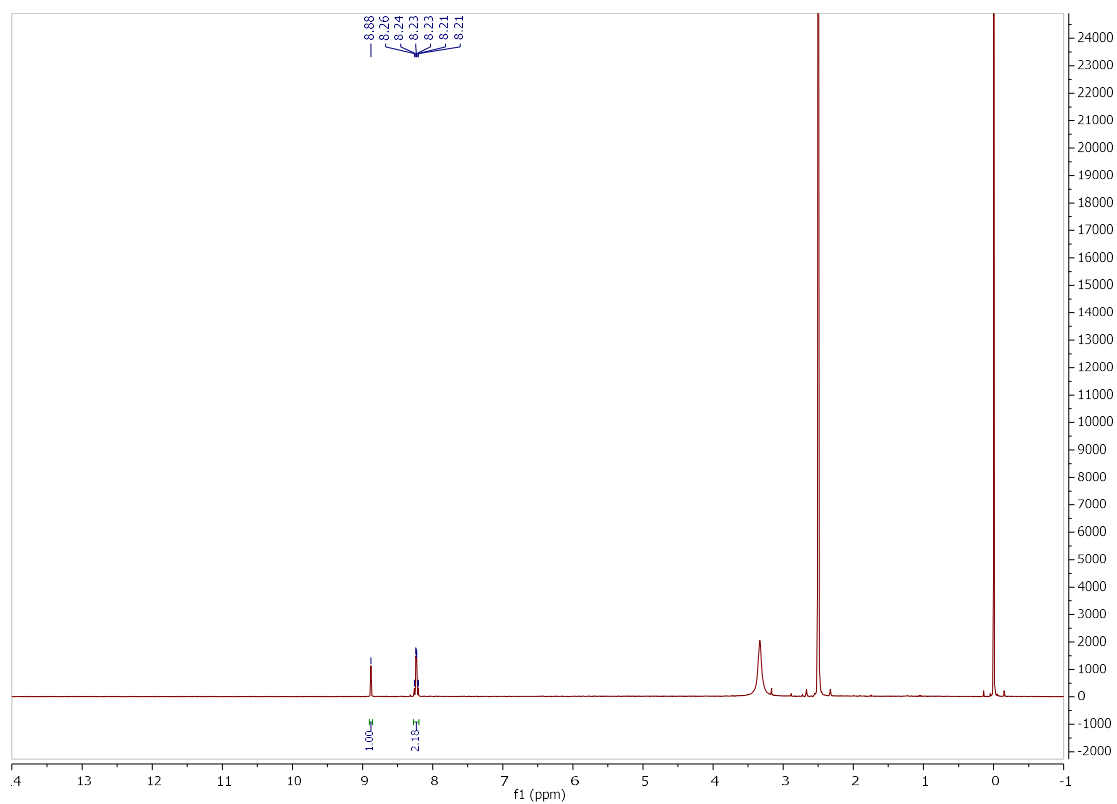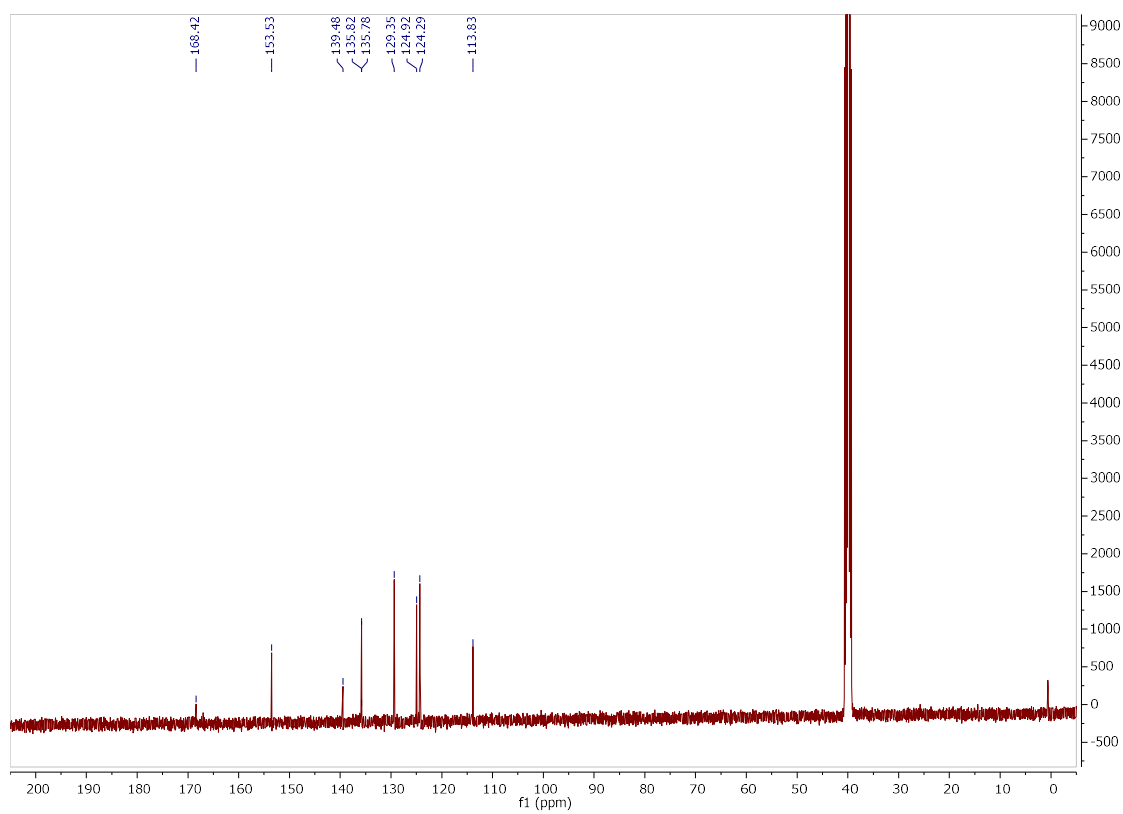

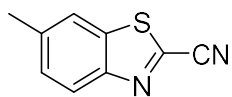

Compound 72

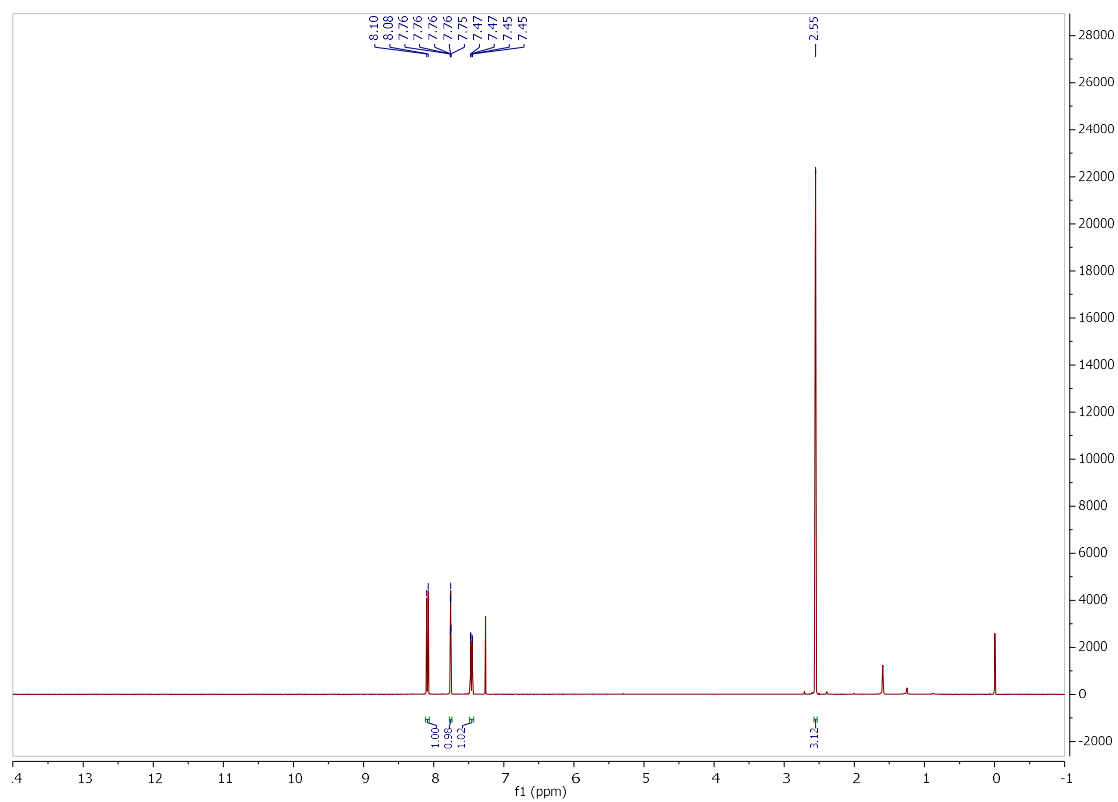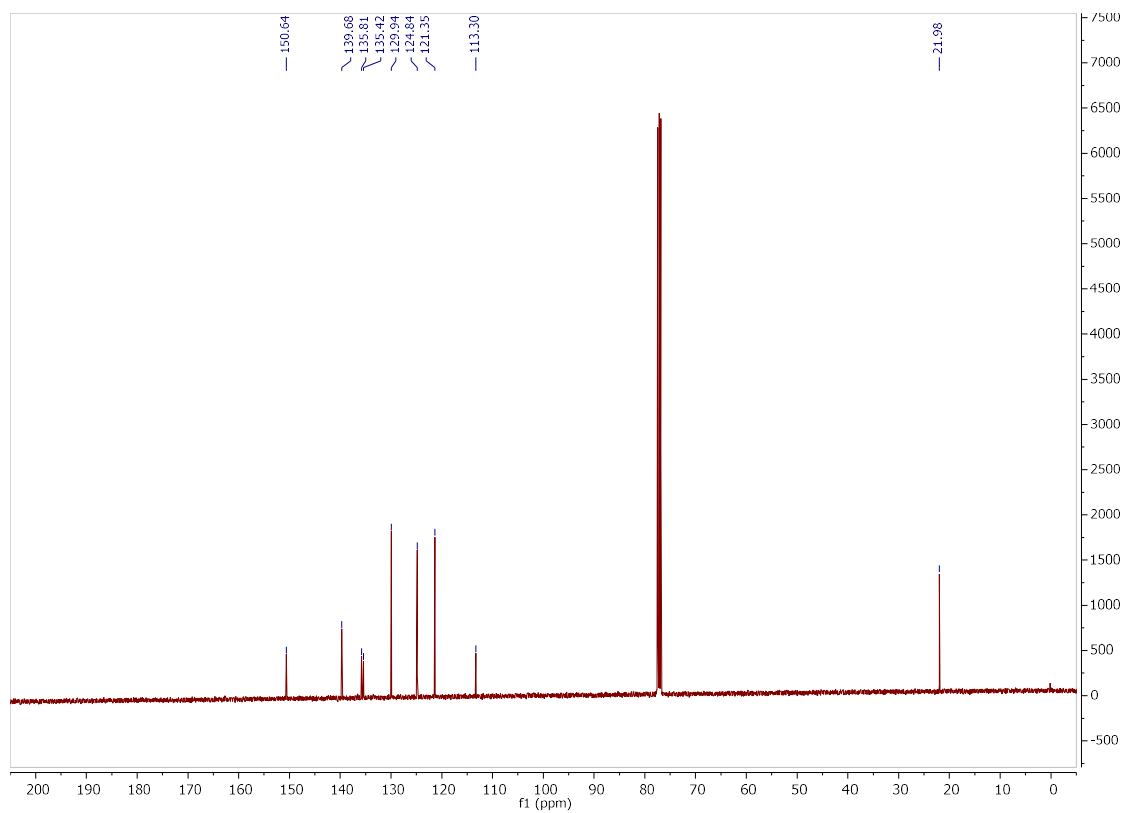

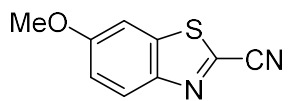

**Compound 73**

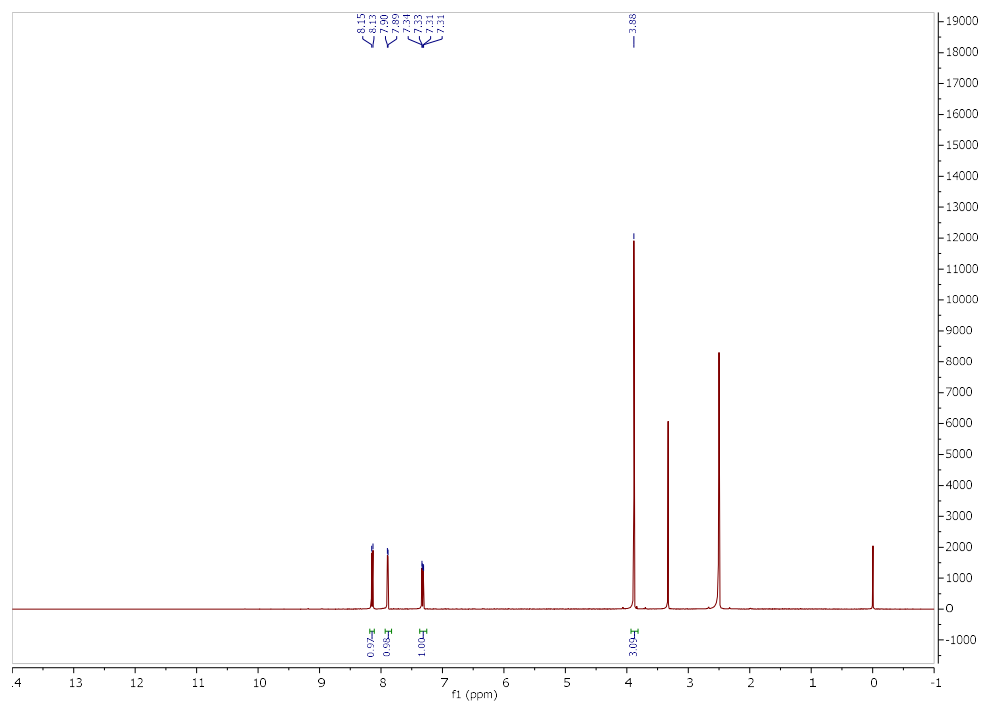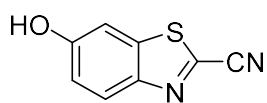

**Compound 74**

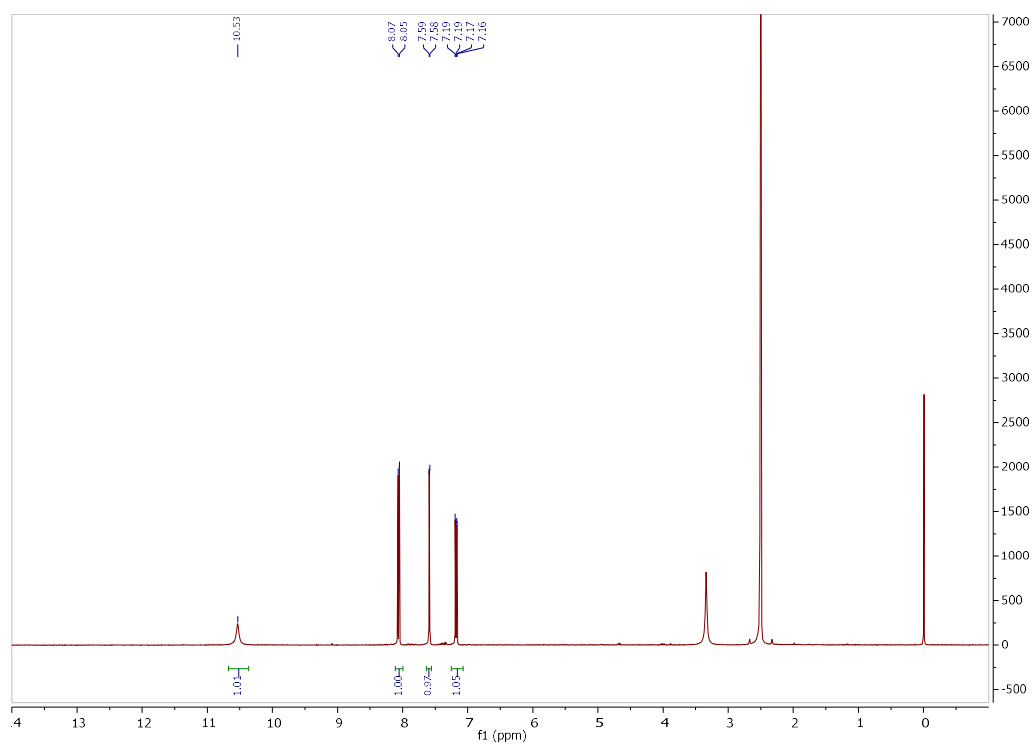

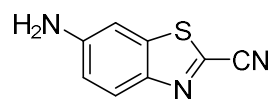

**Compound 75**

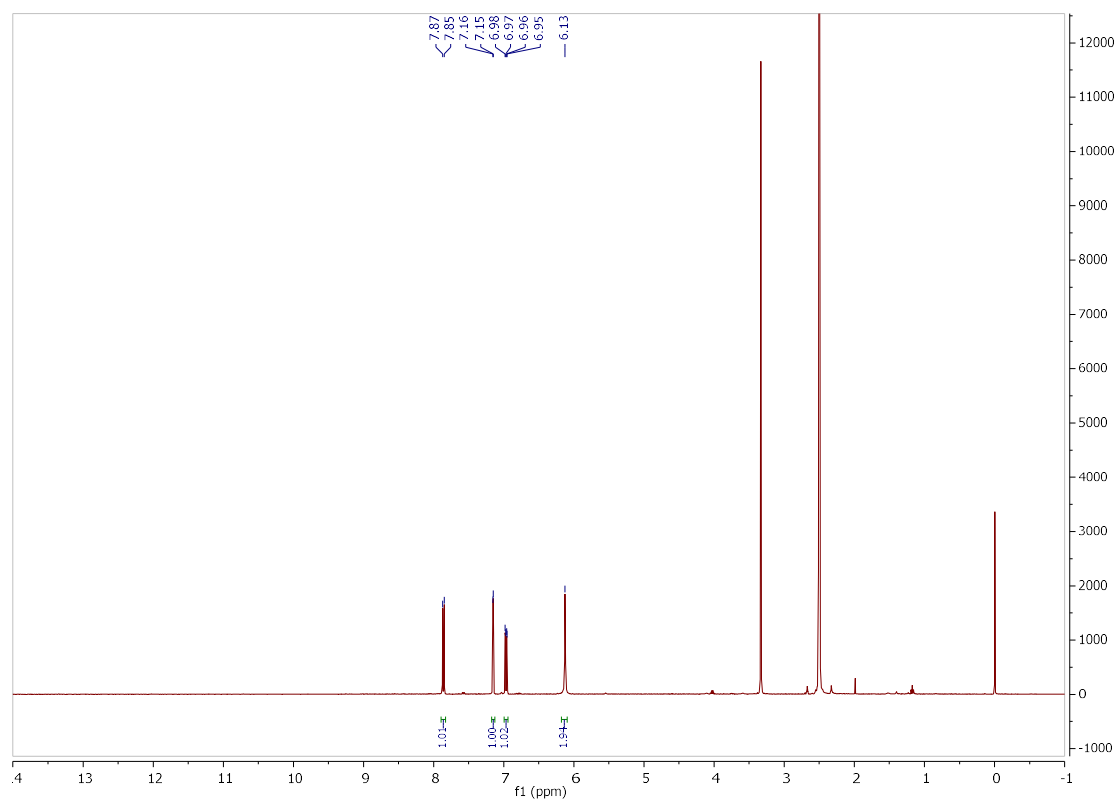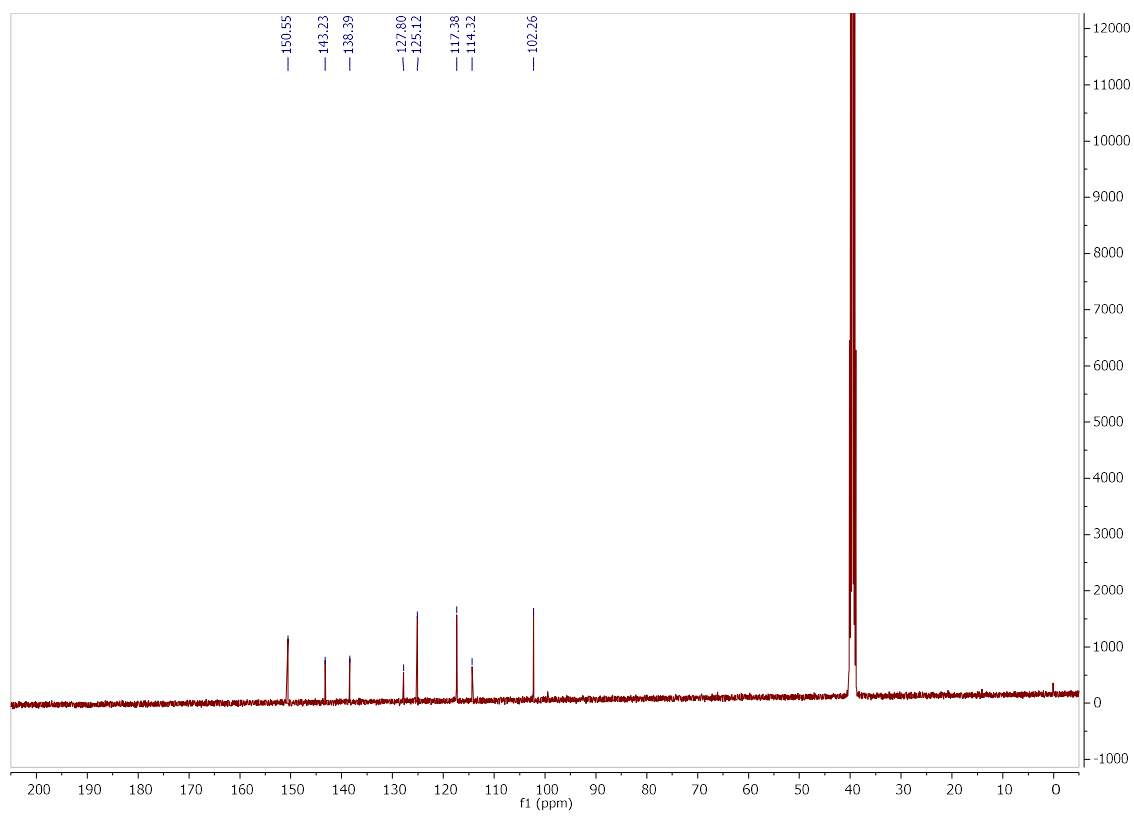

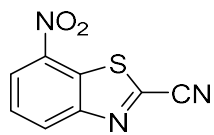

**Compound 76**

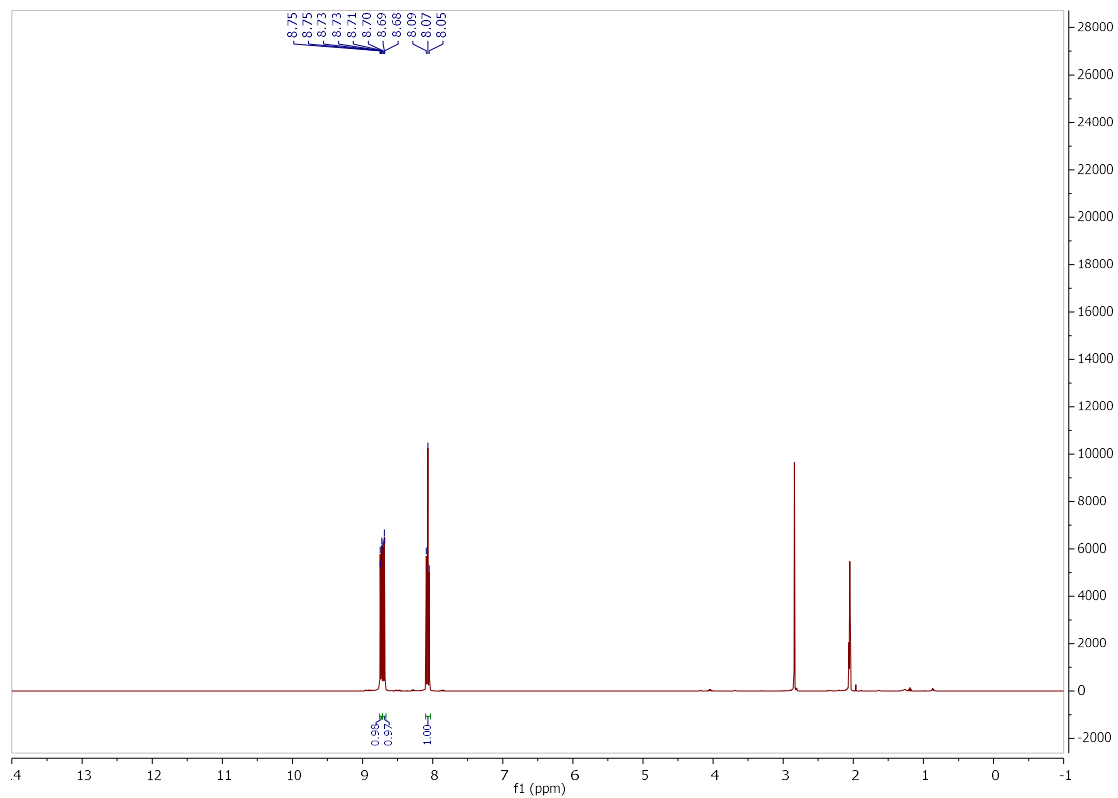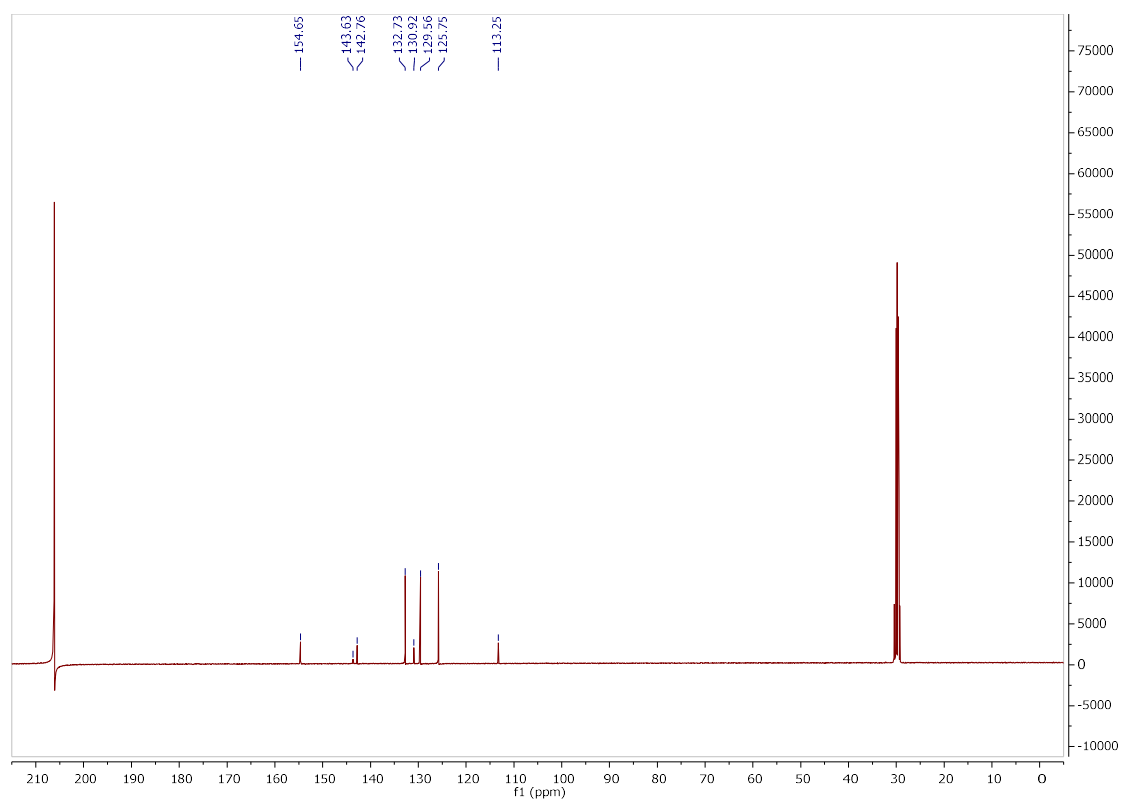

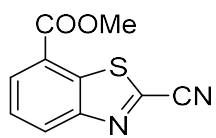

**Compound 77**

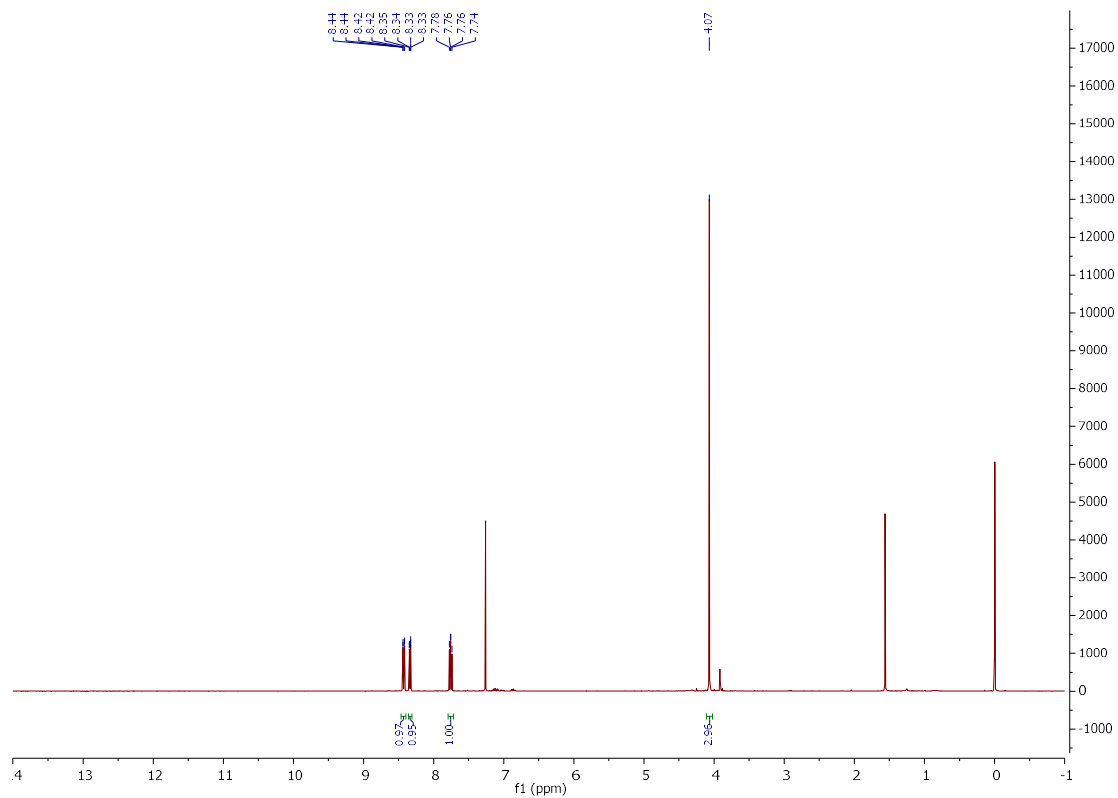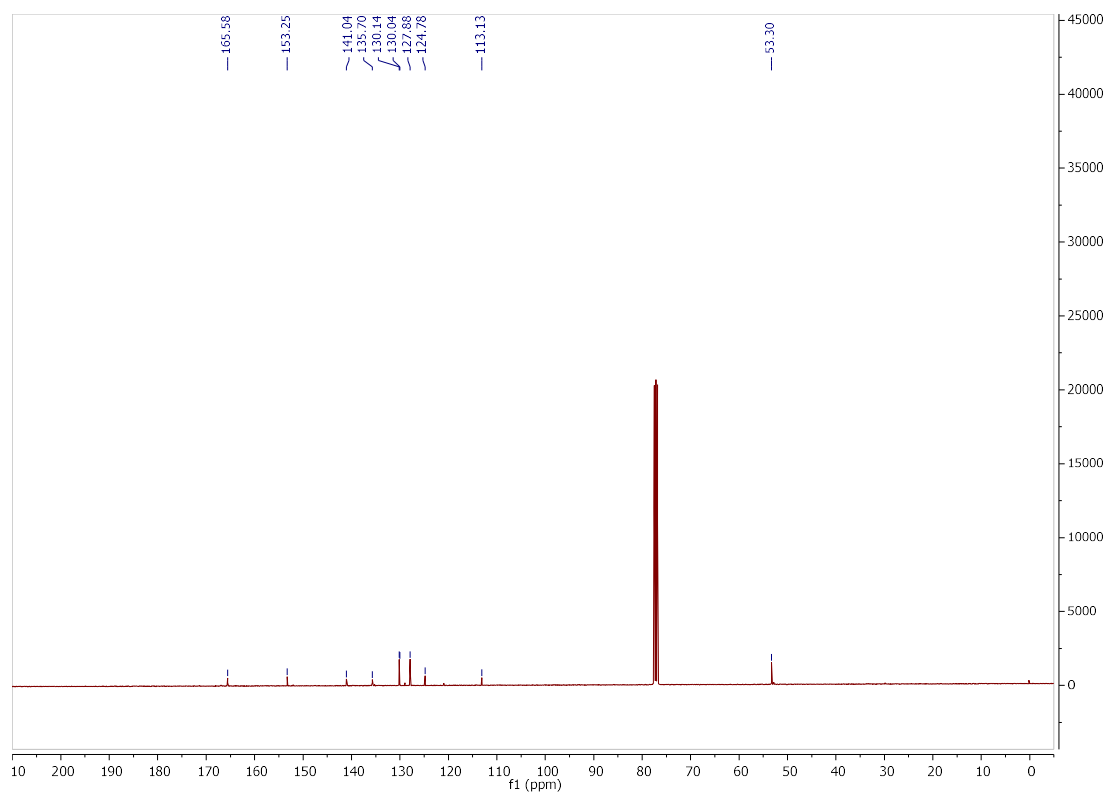

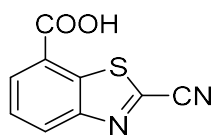

**Compound 78**

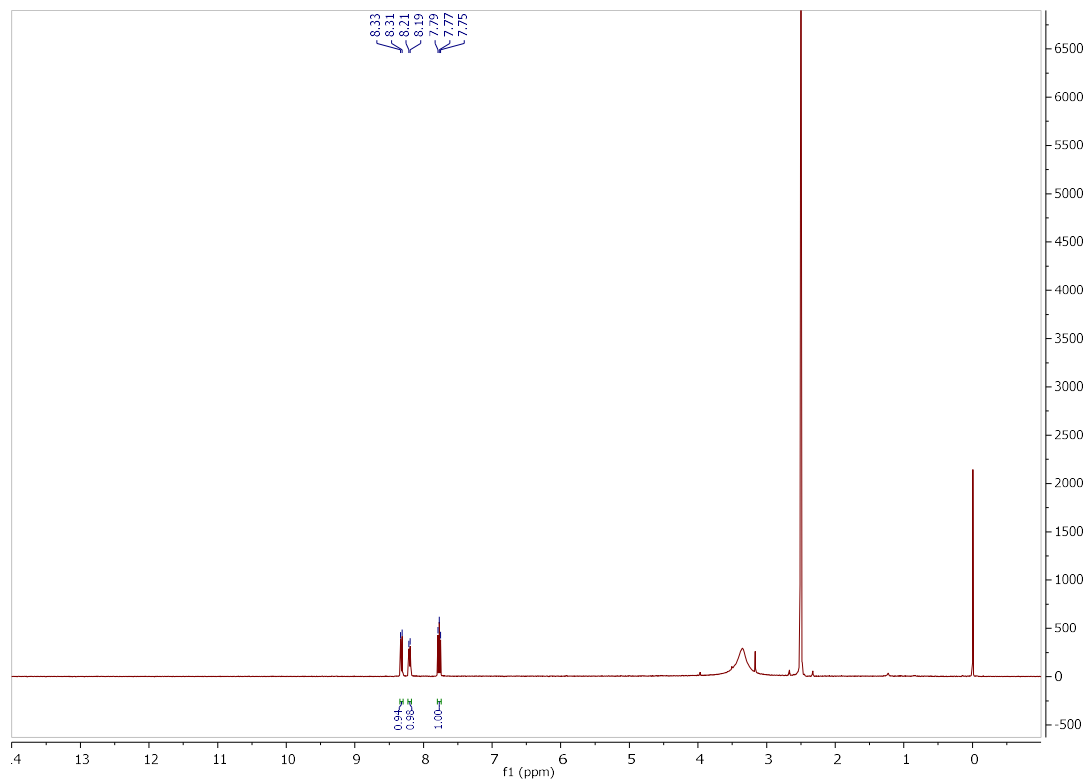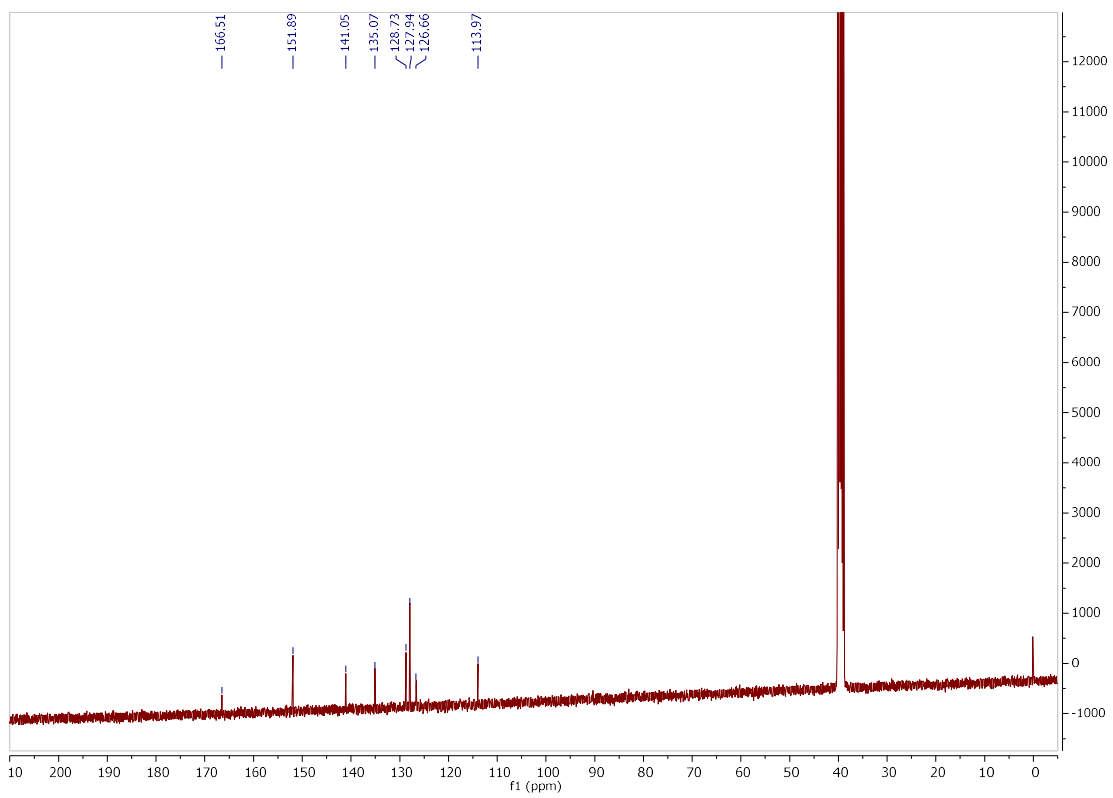



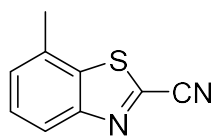

**Compound 80**

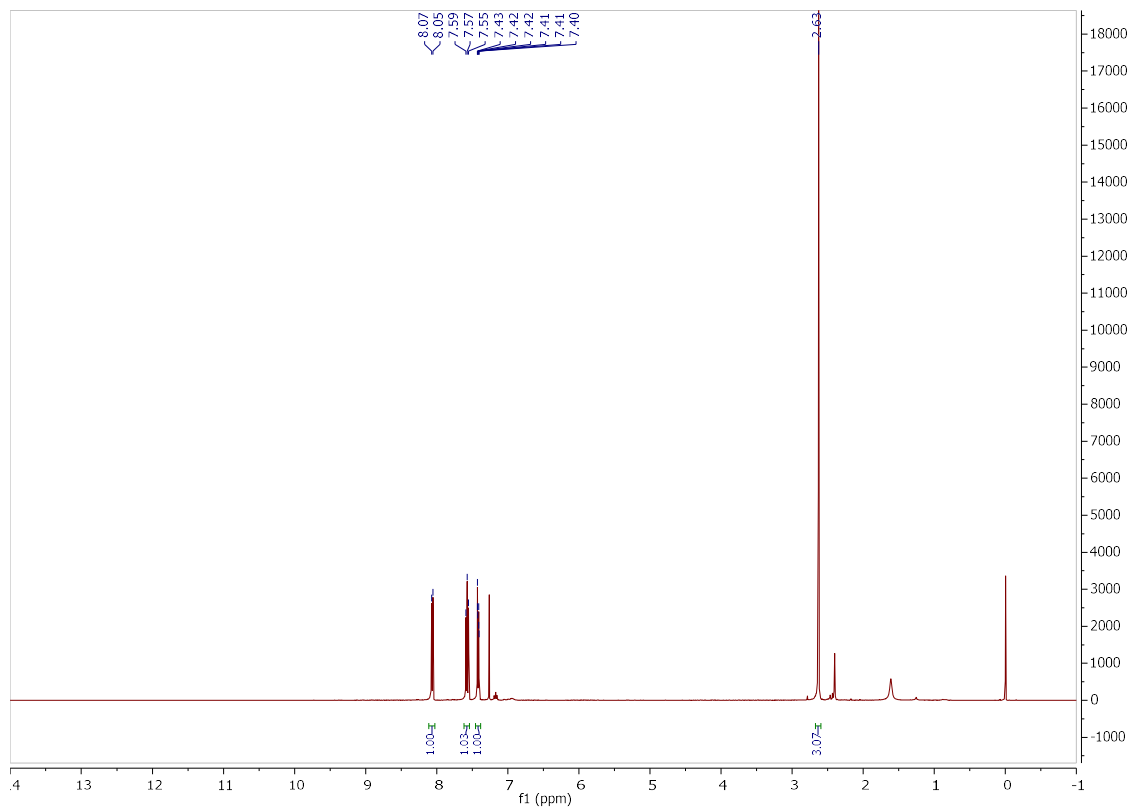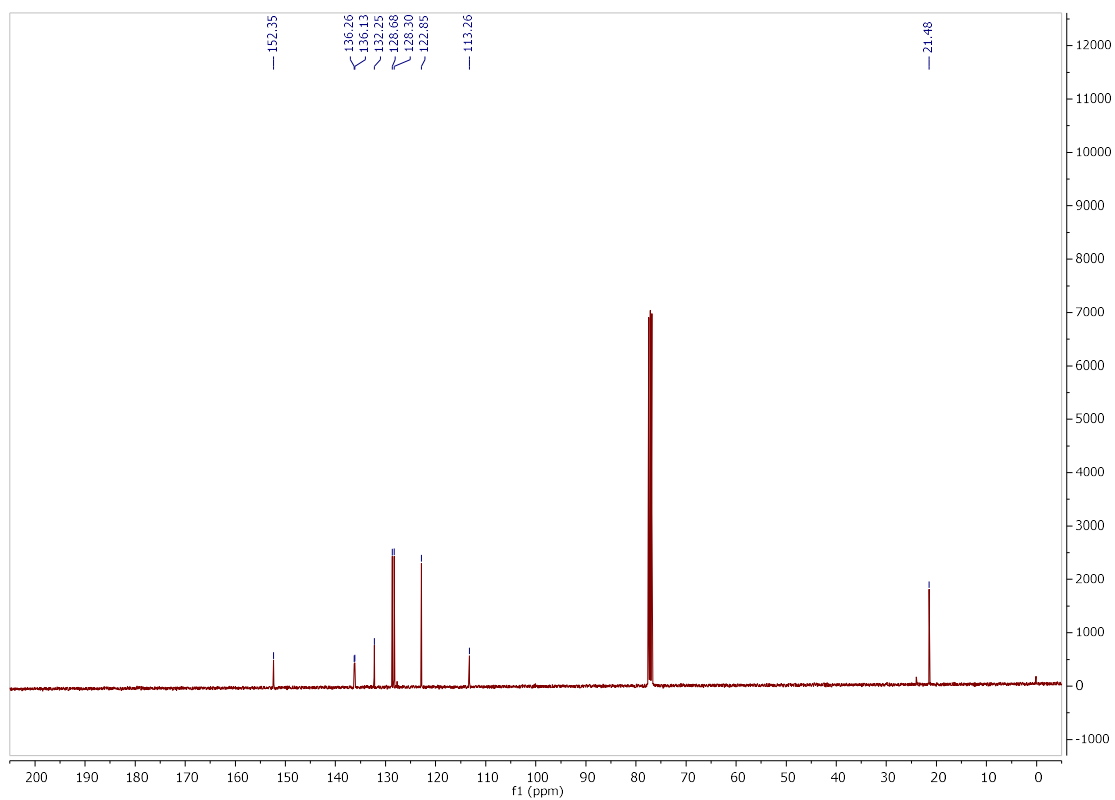

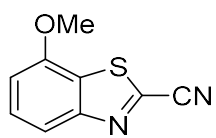

**Compound 81**

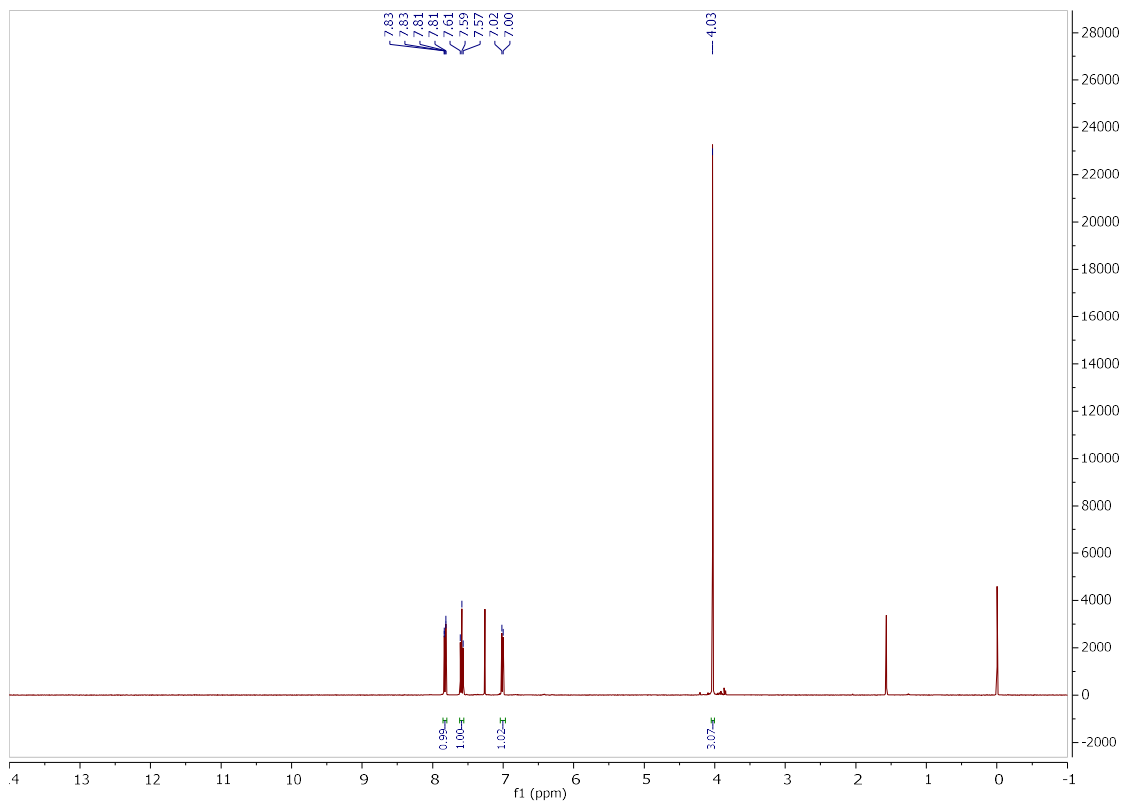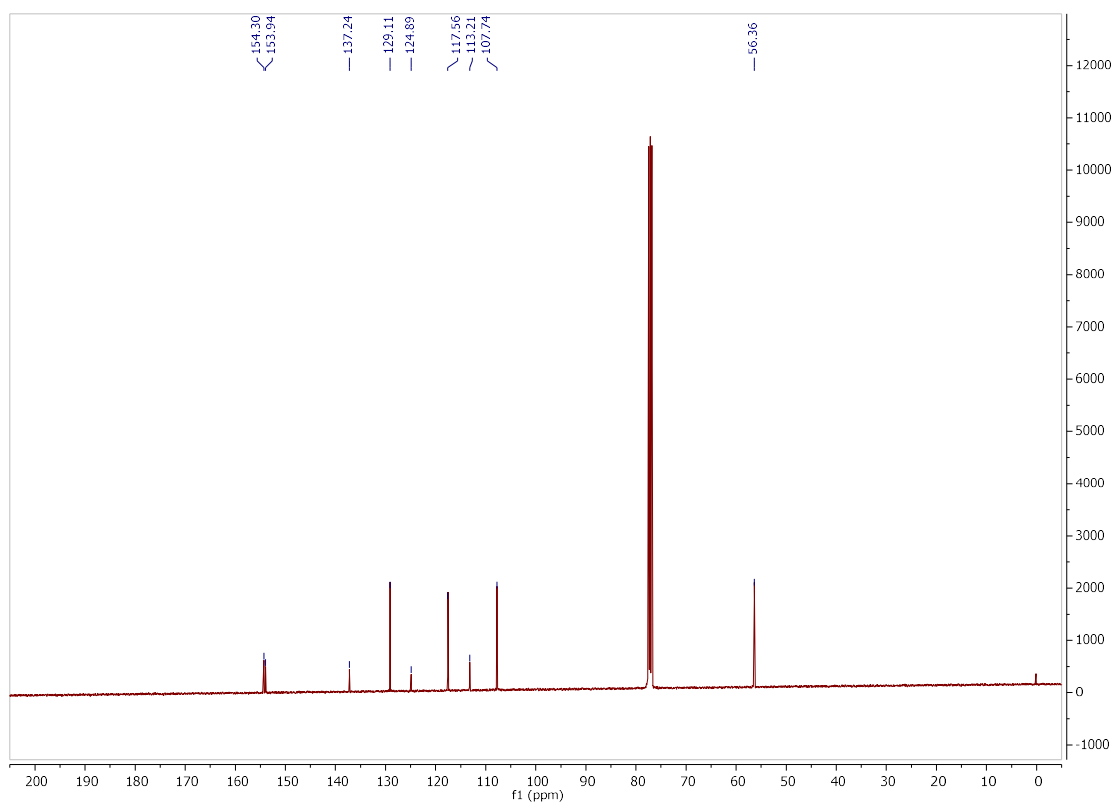

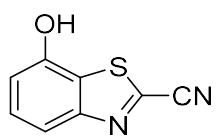

**Compound 82**

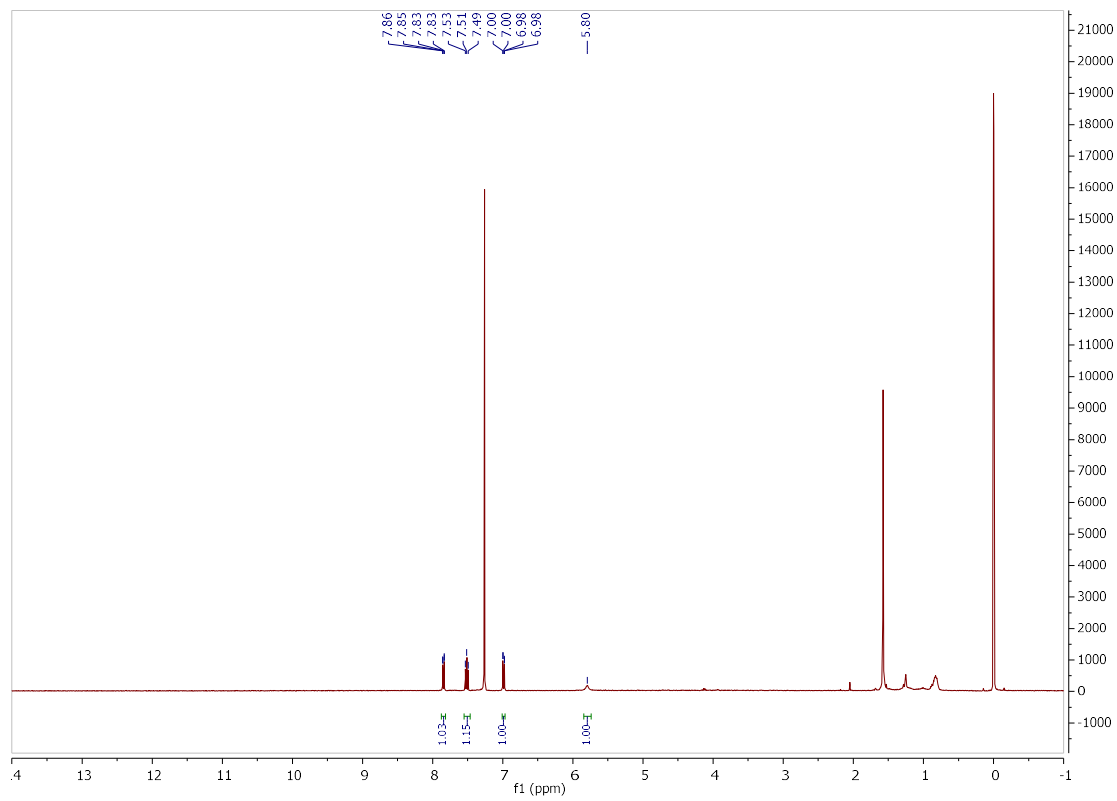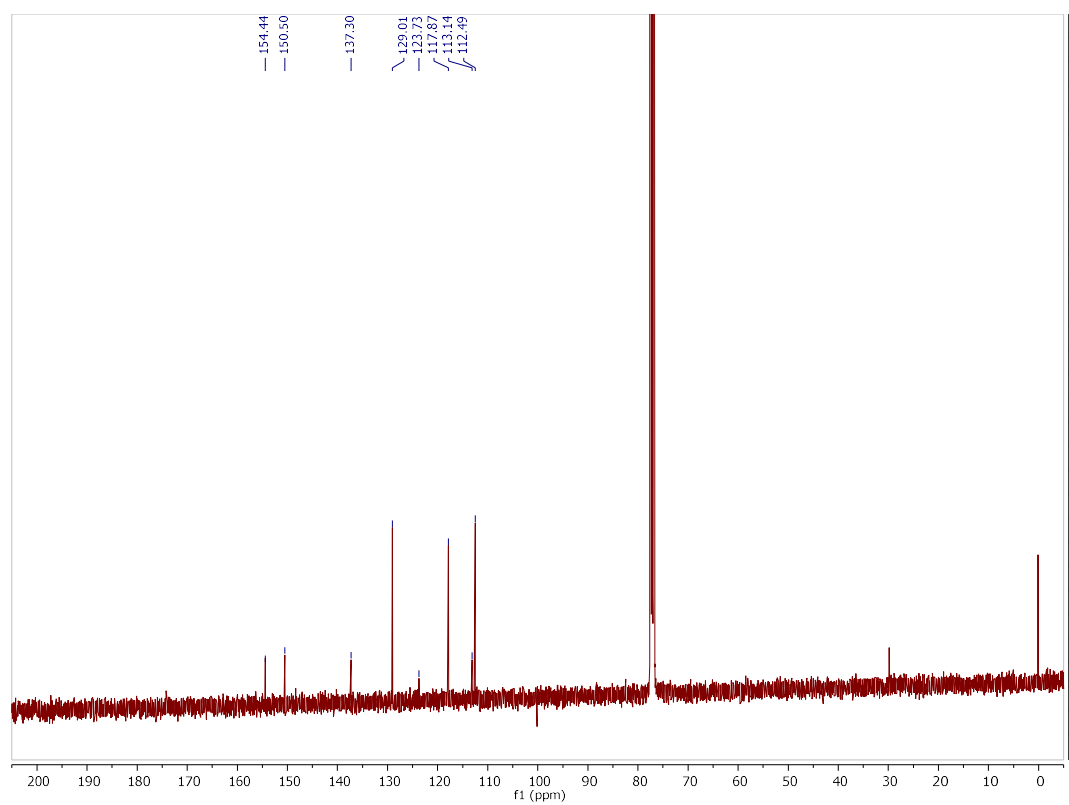

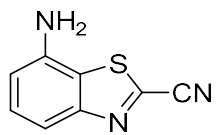

**Compound 83**

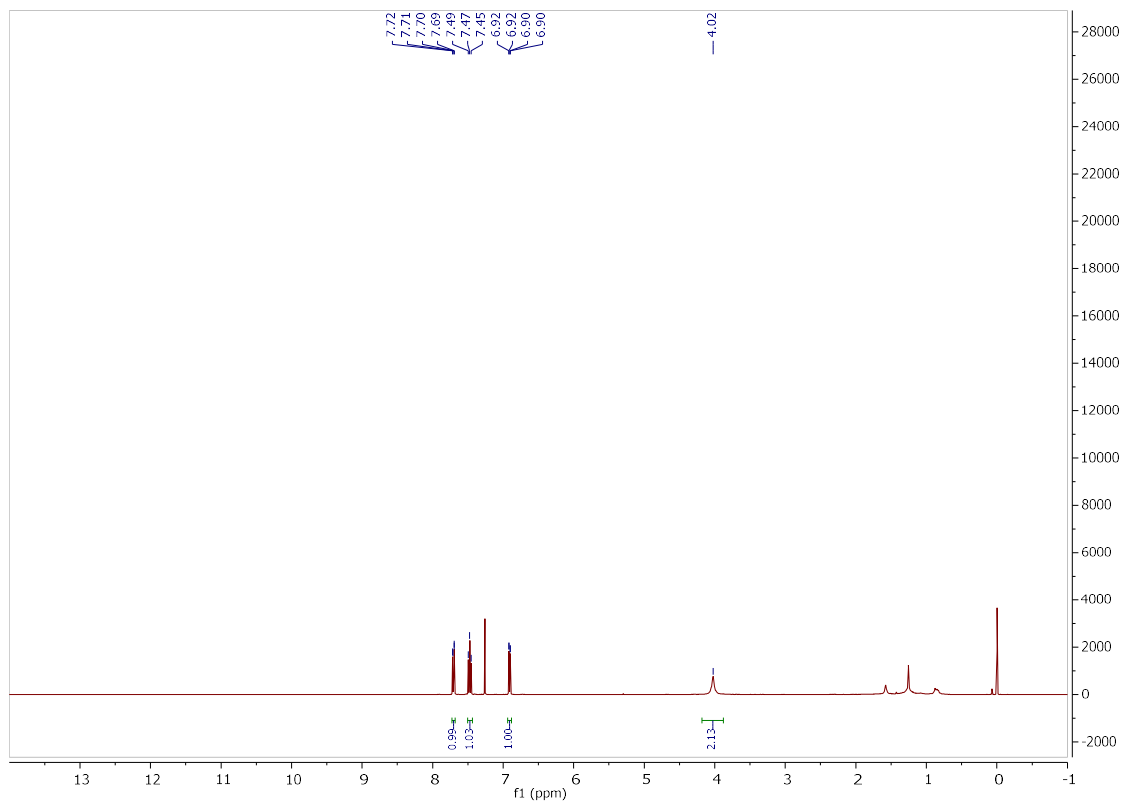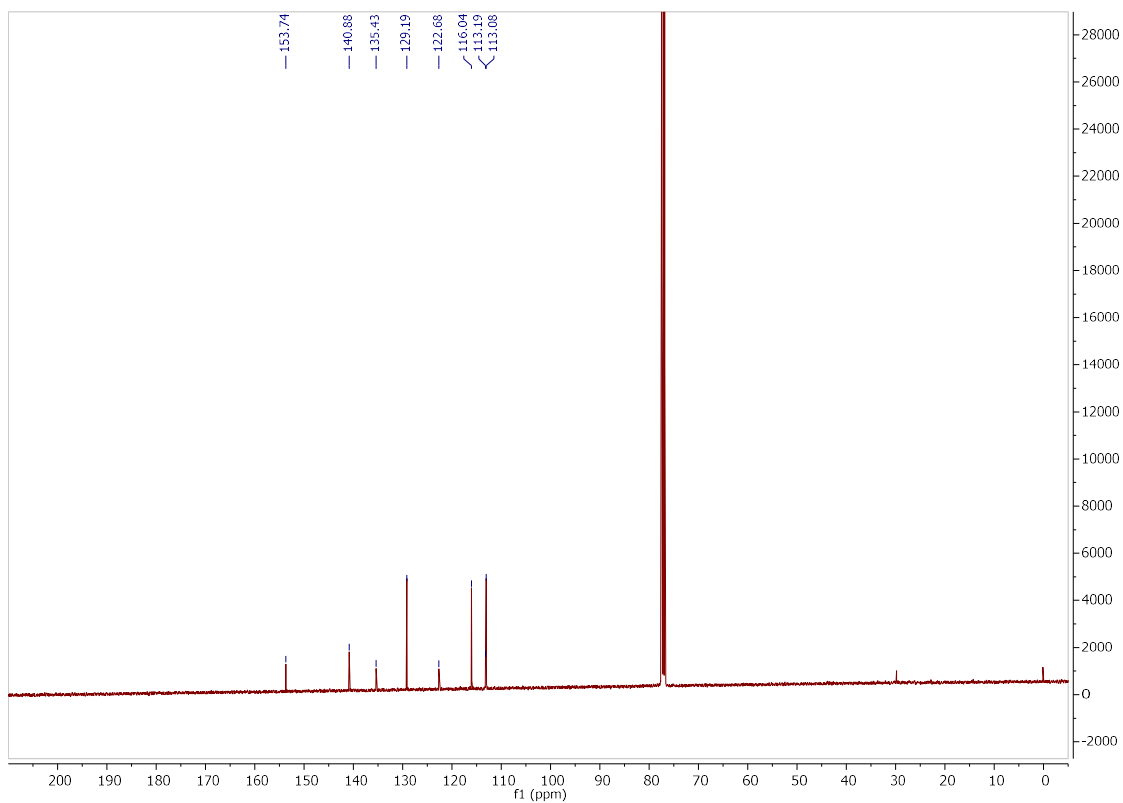

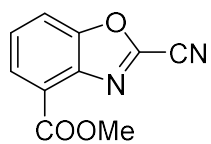

**Compound 86**

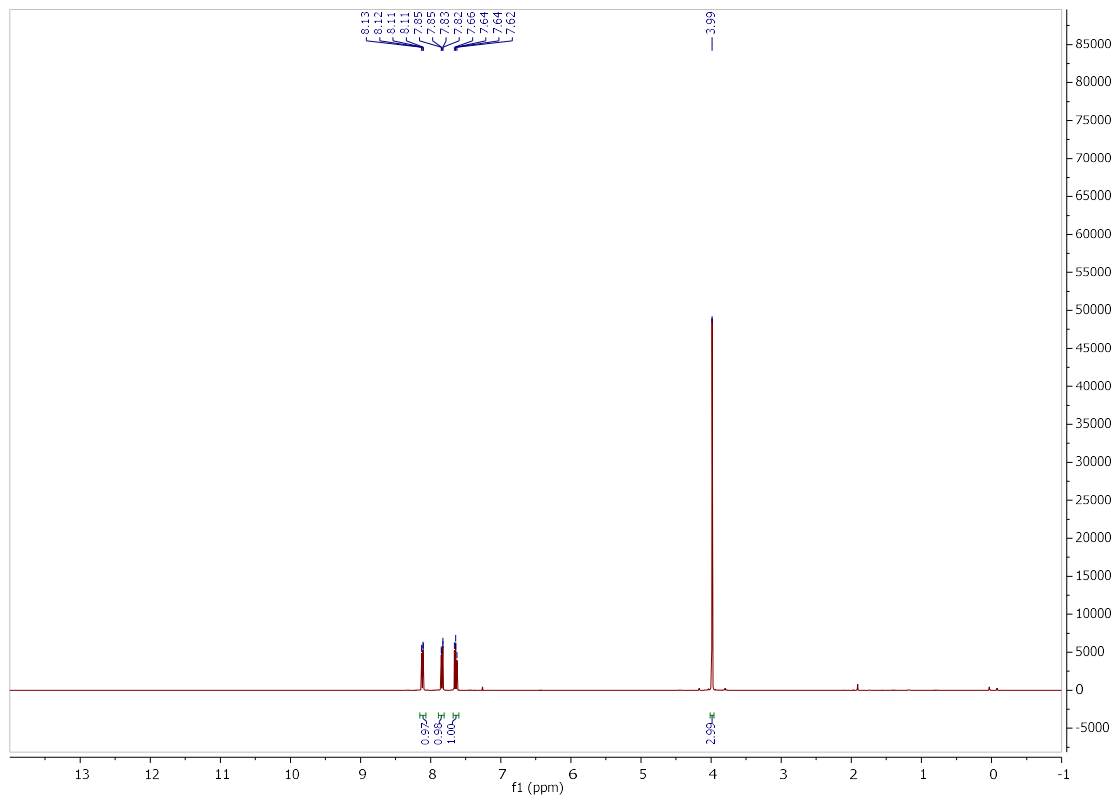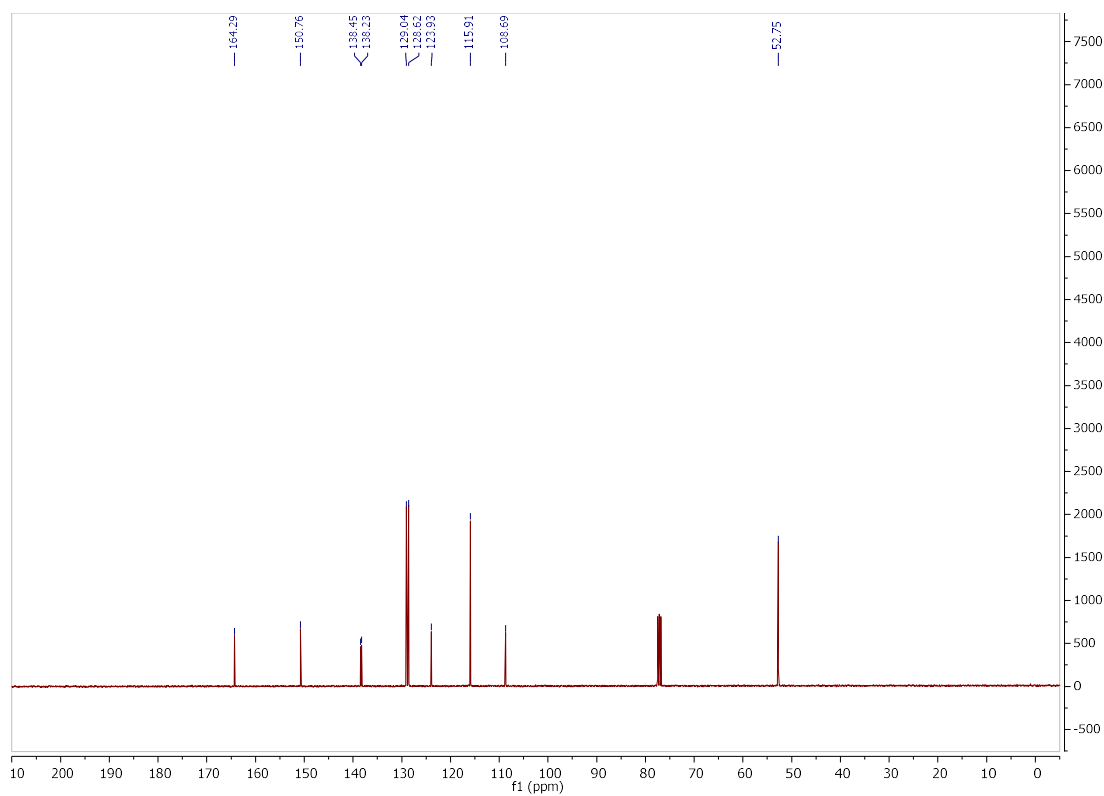

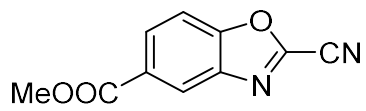

Compound 94

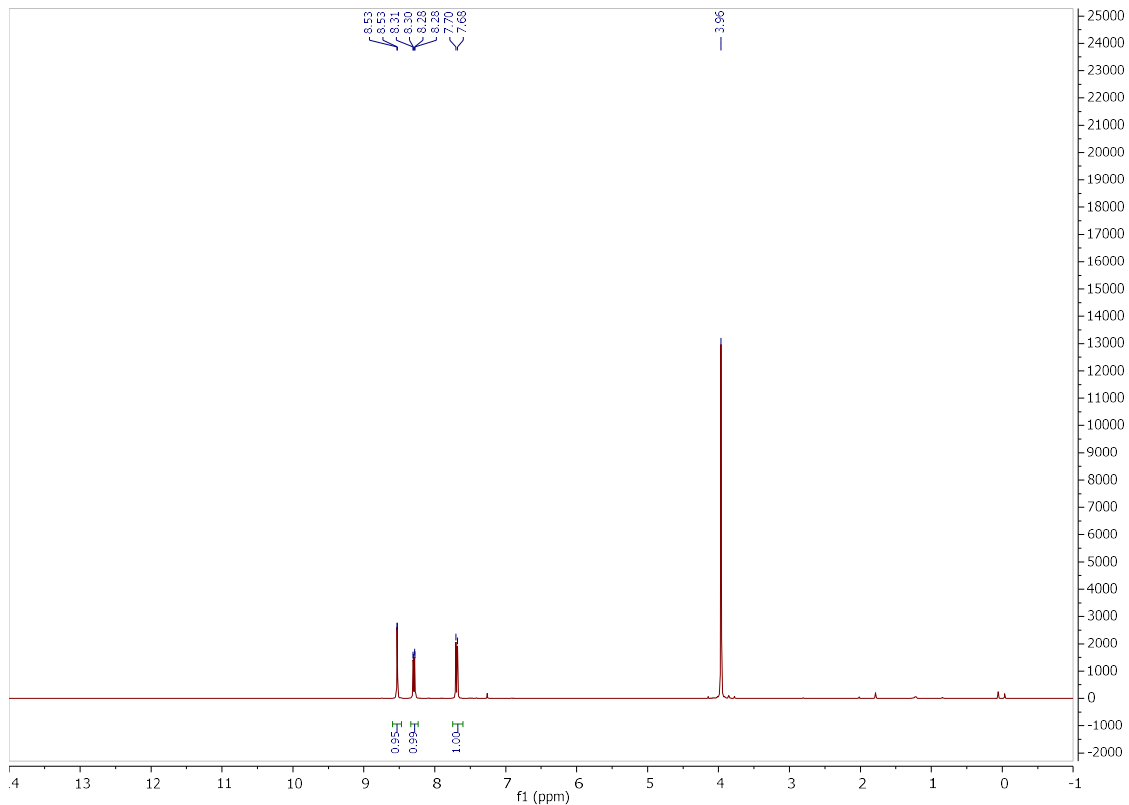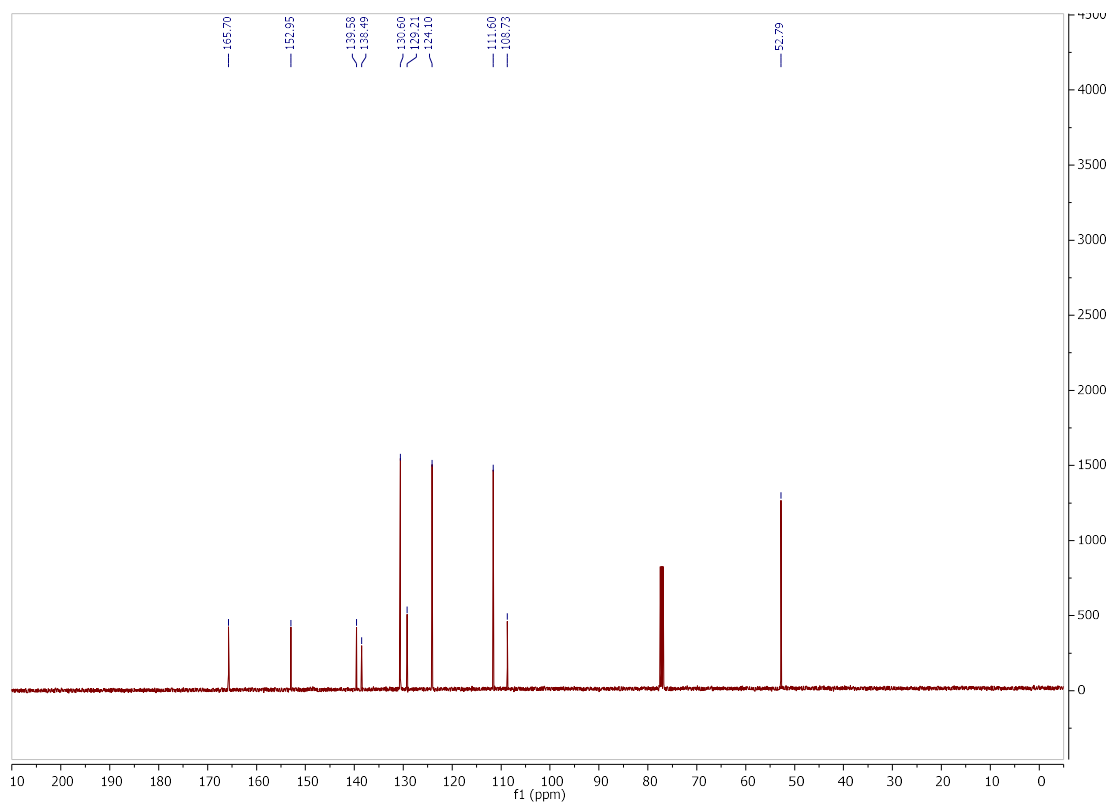

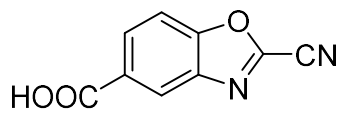

Compound 95

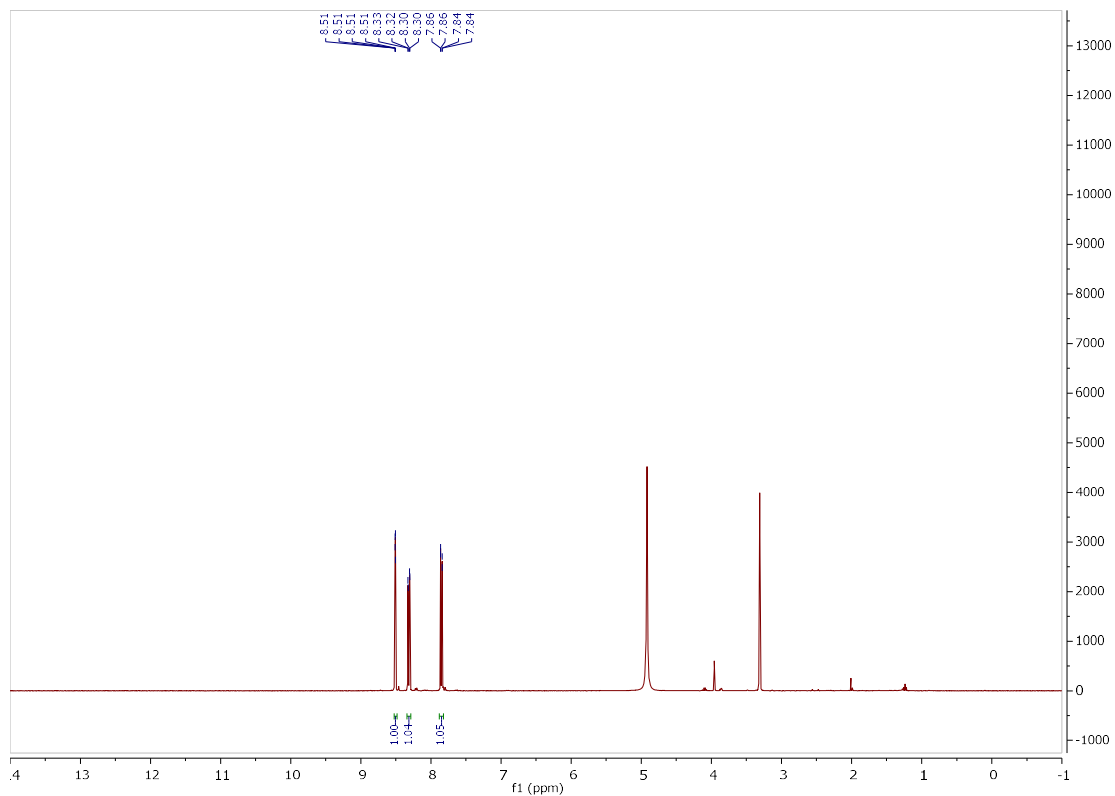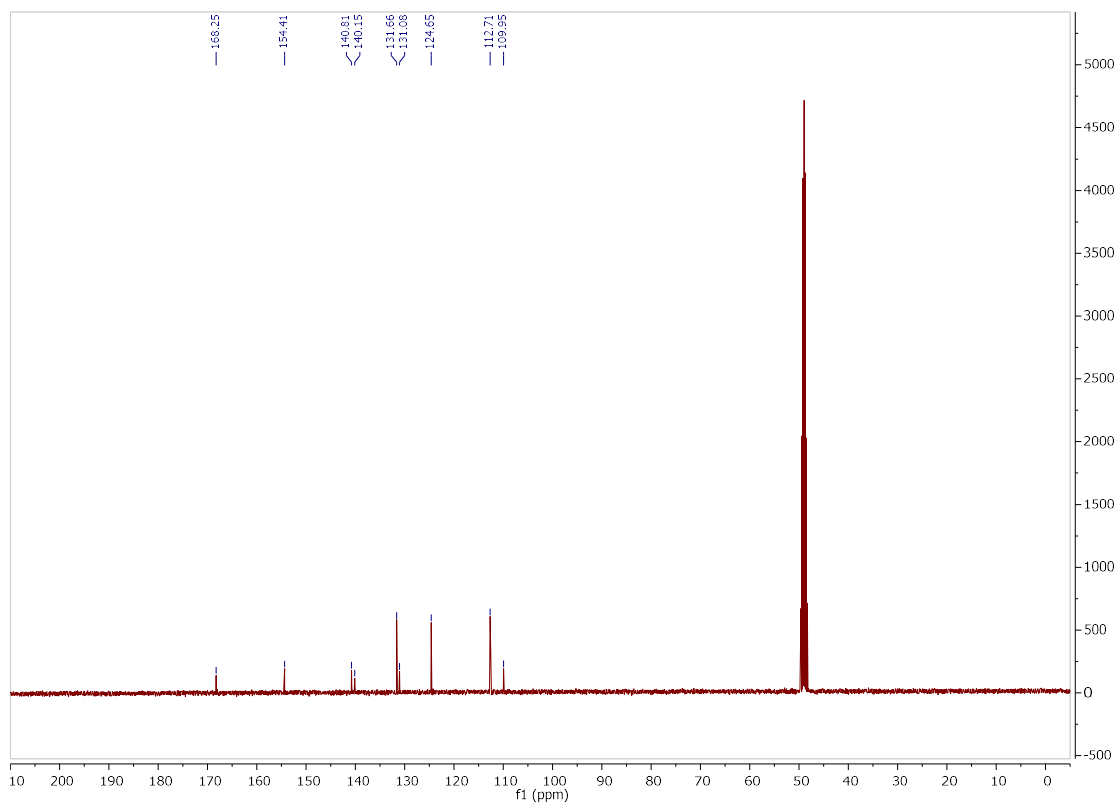

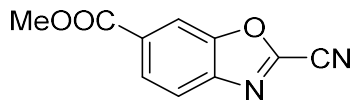

**Compound 102**

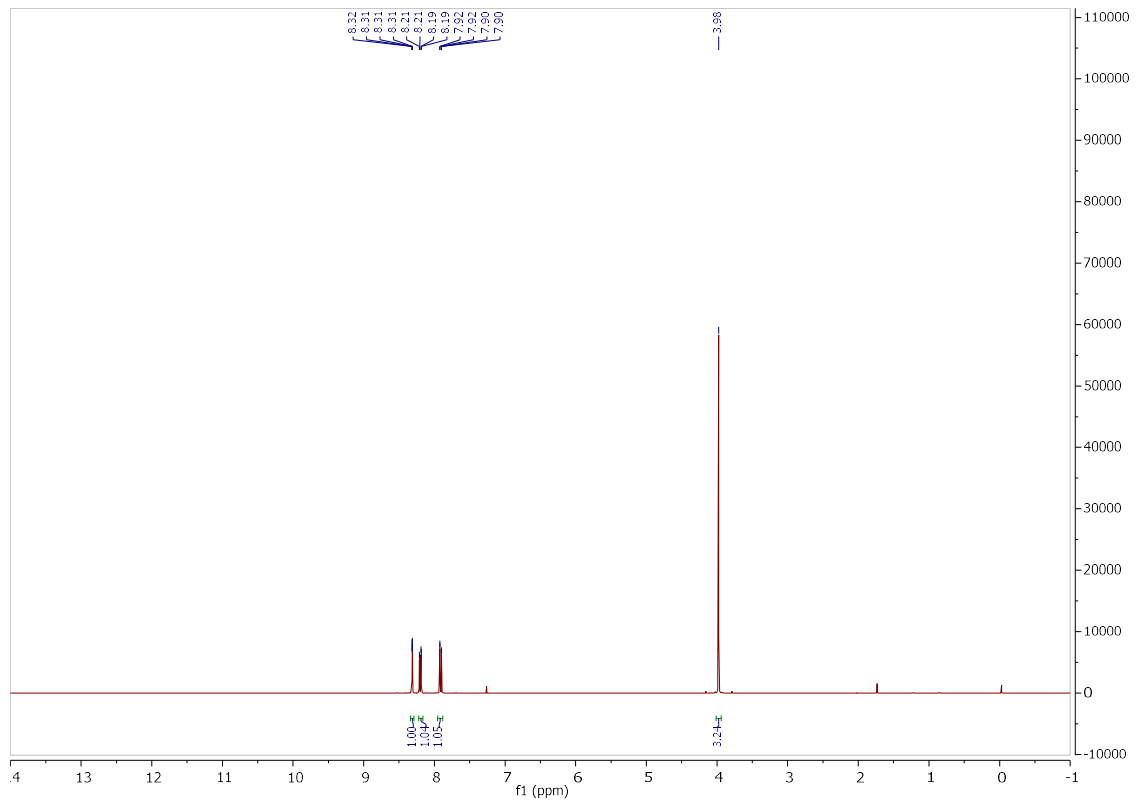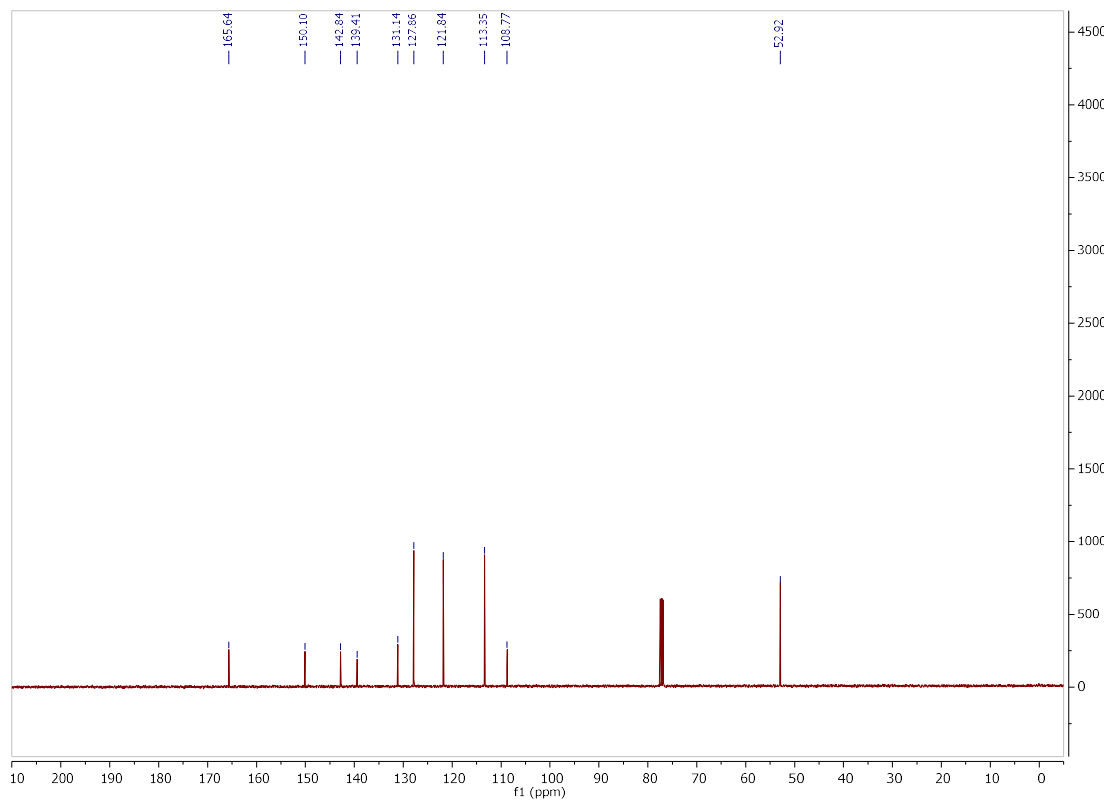



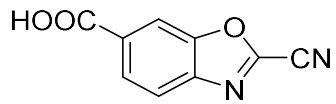

**Compound 103**

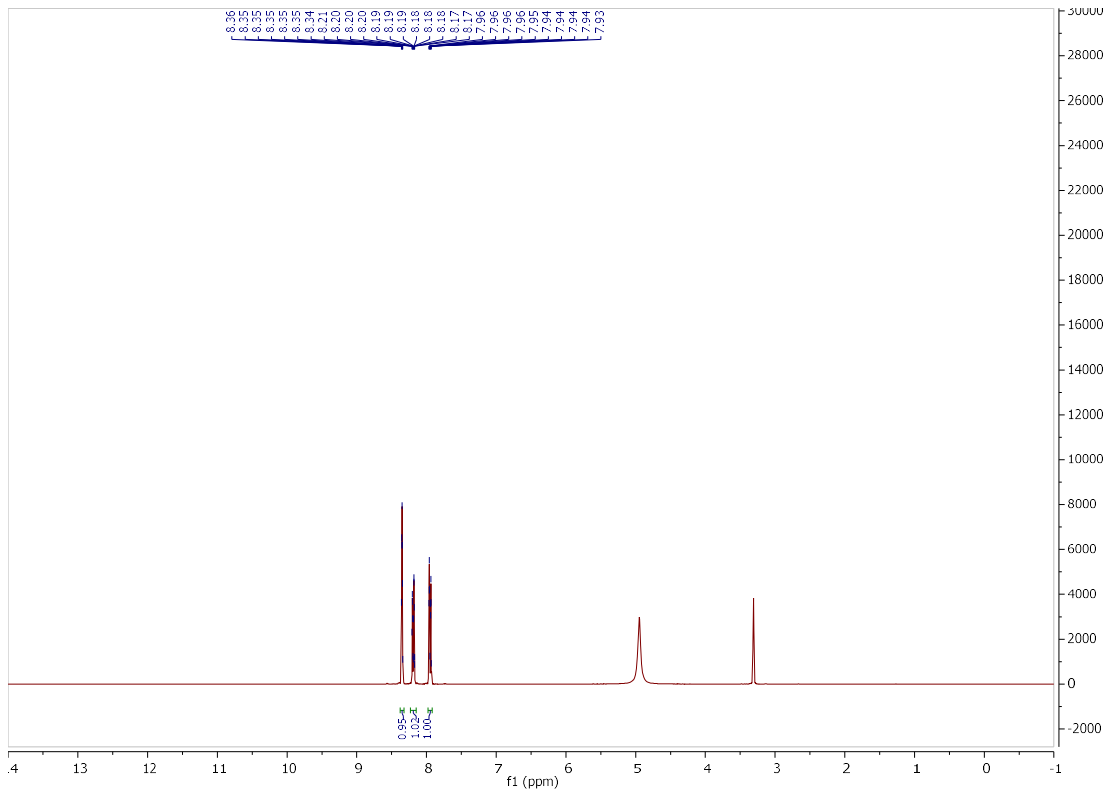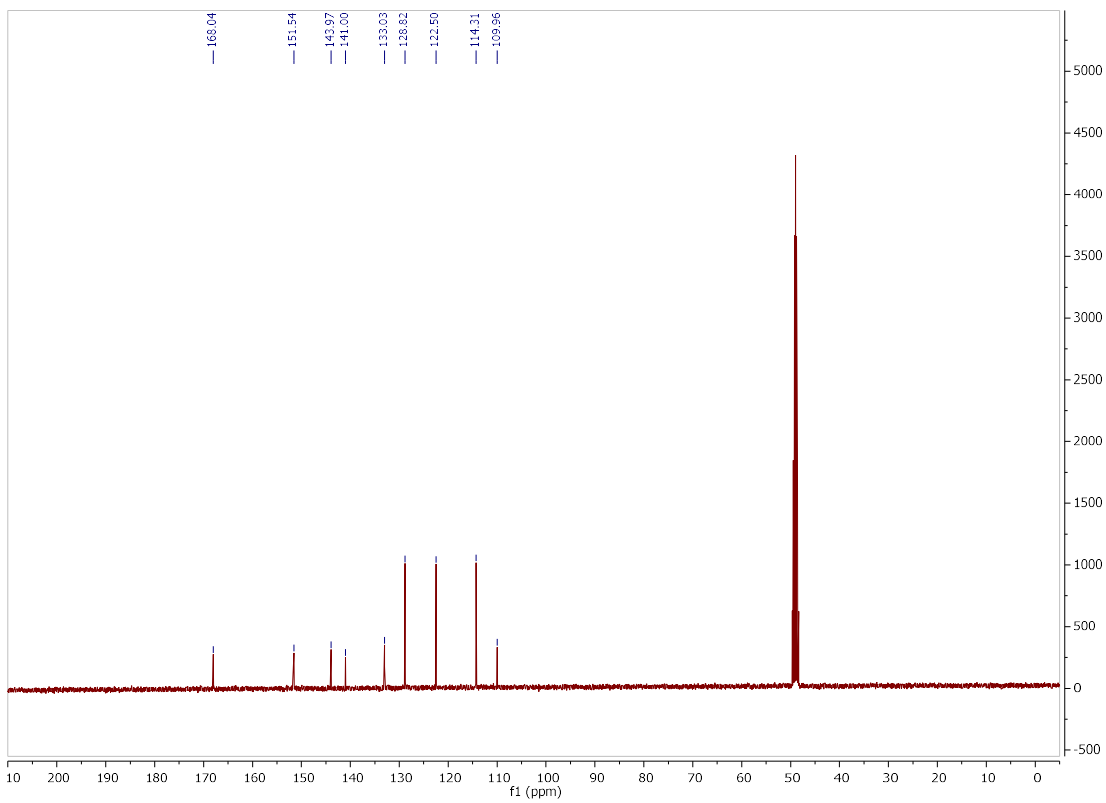

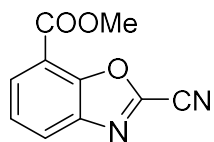

**Compound 110**

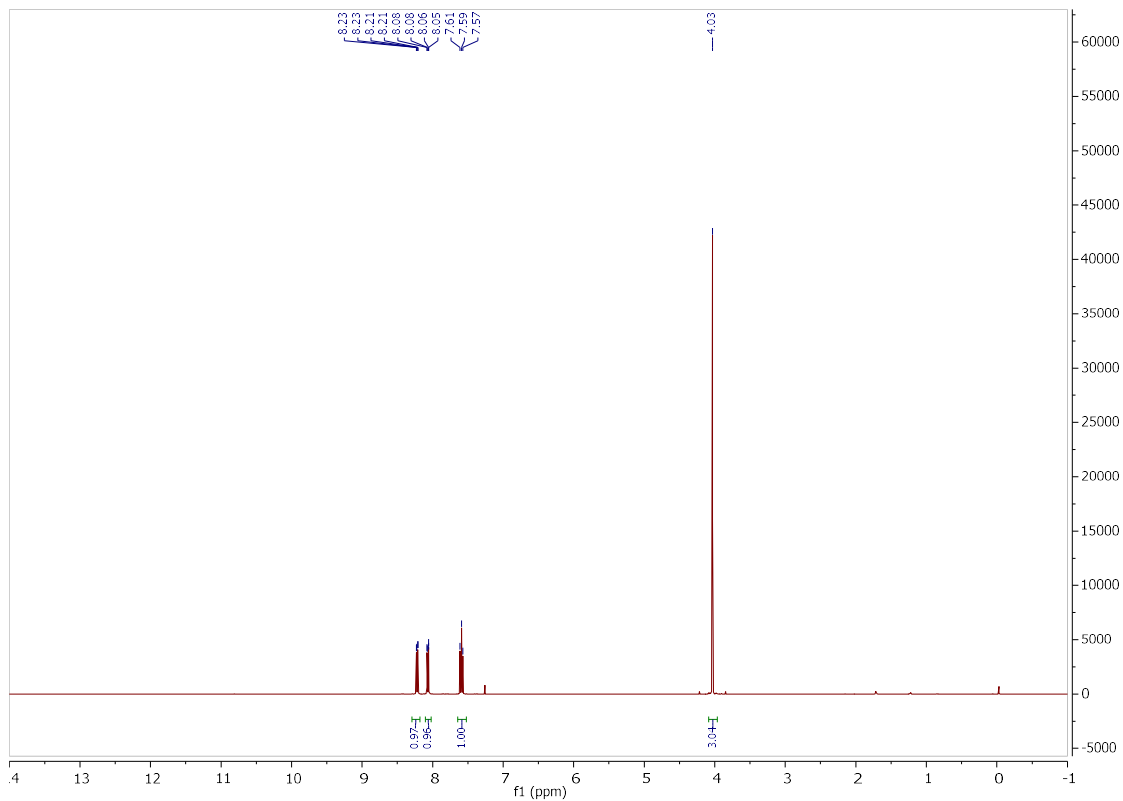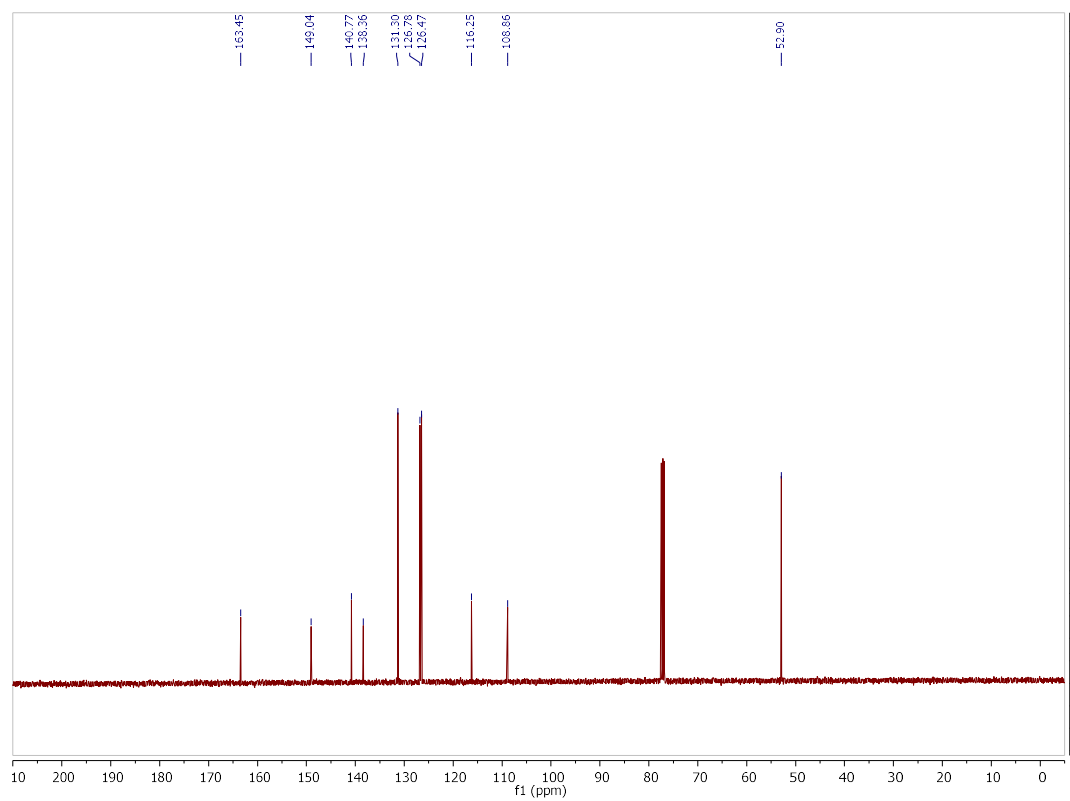

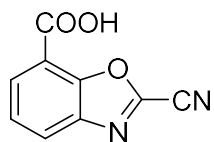

**Compound 111**

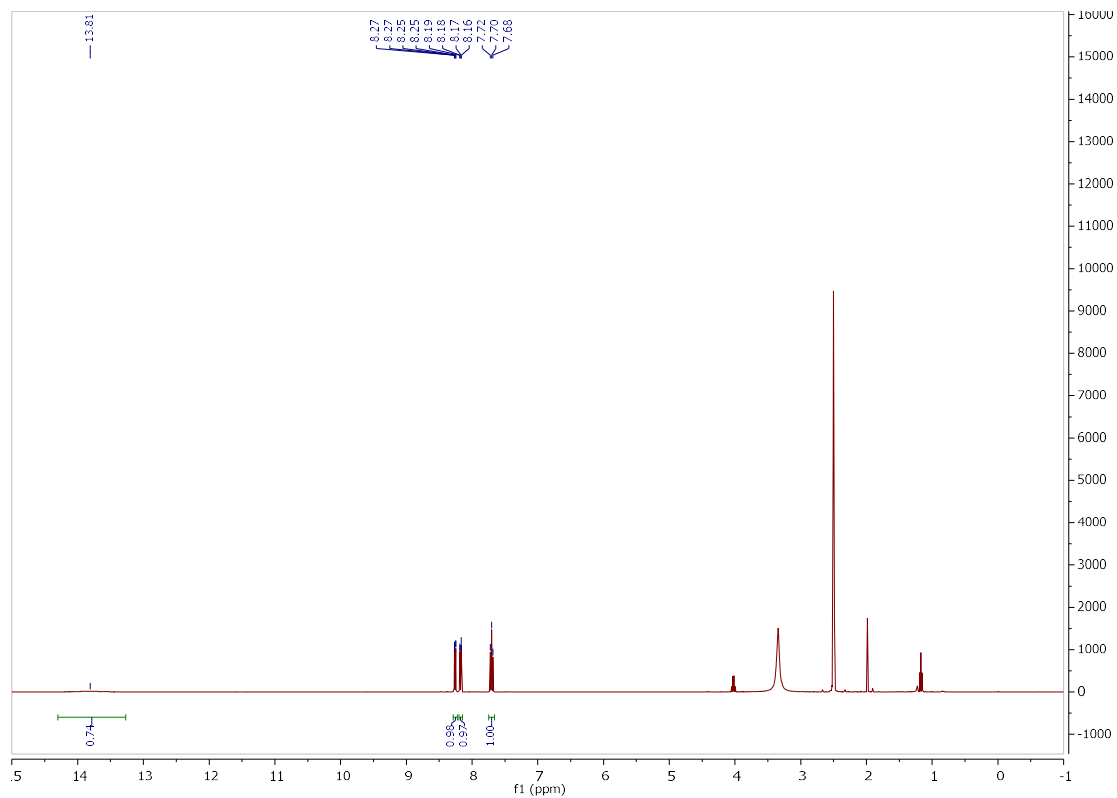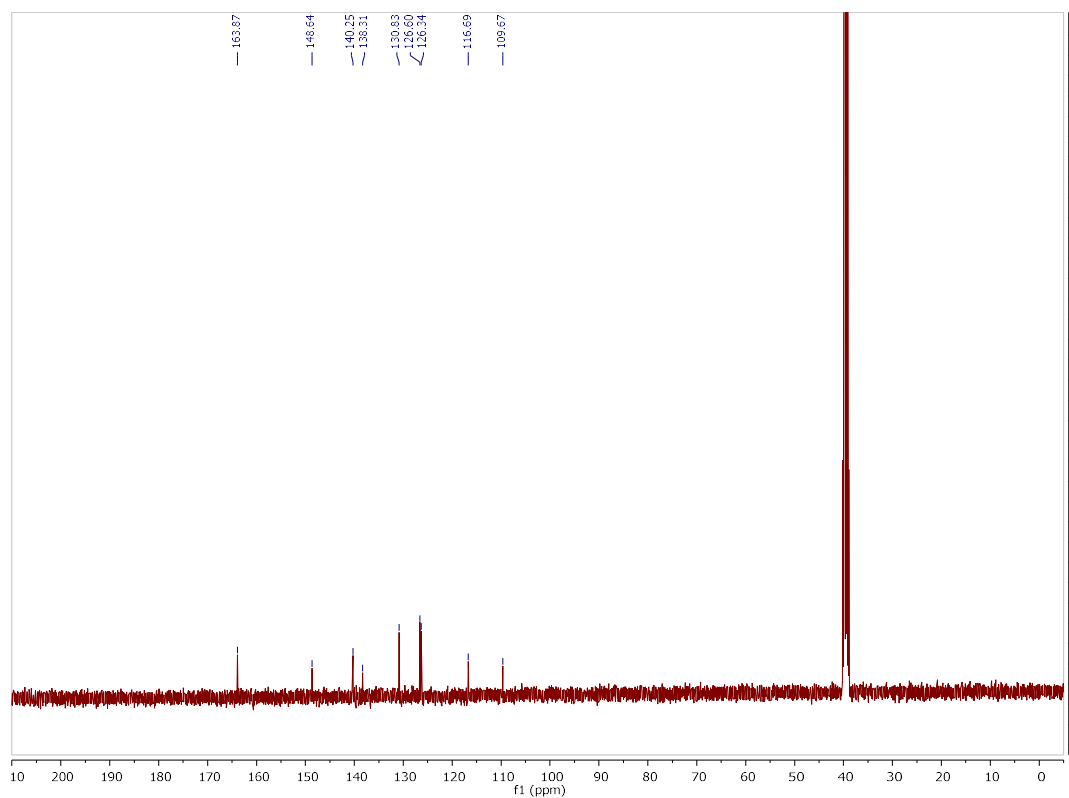

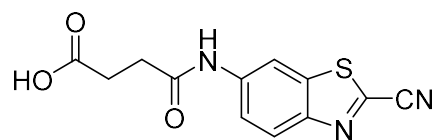

**Compound 117**

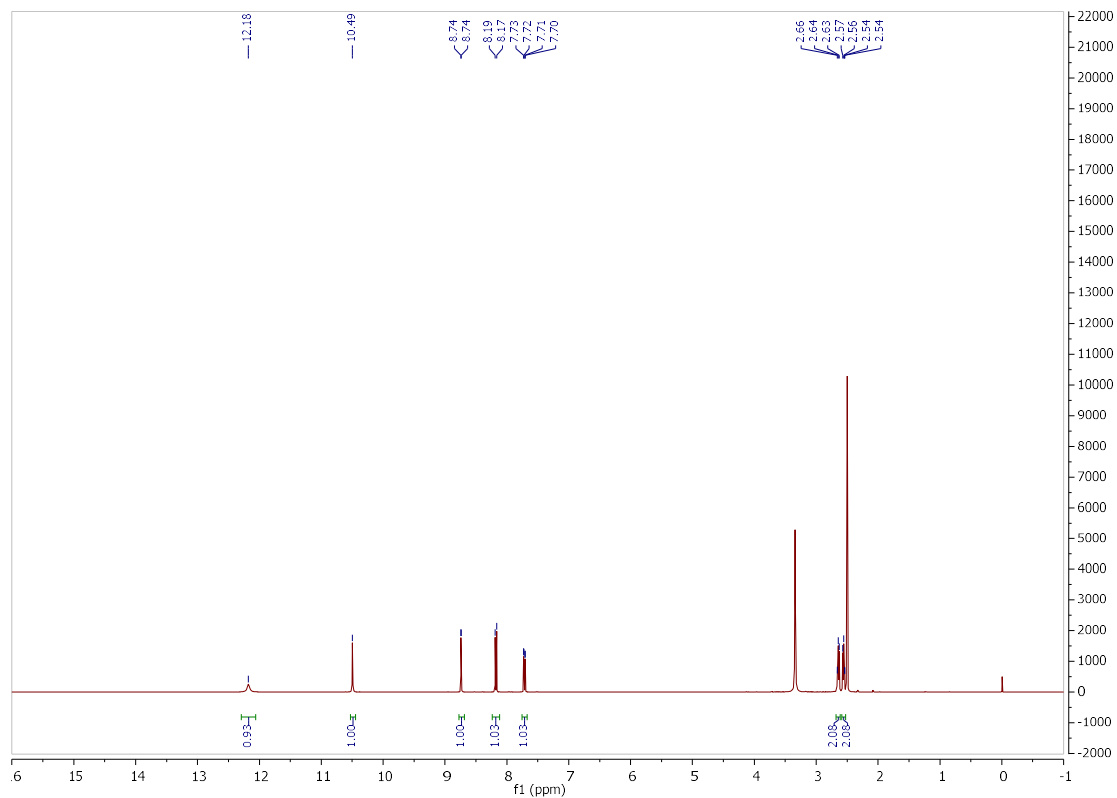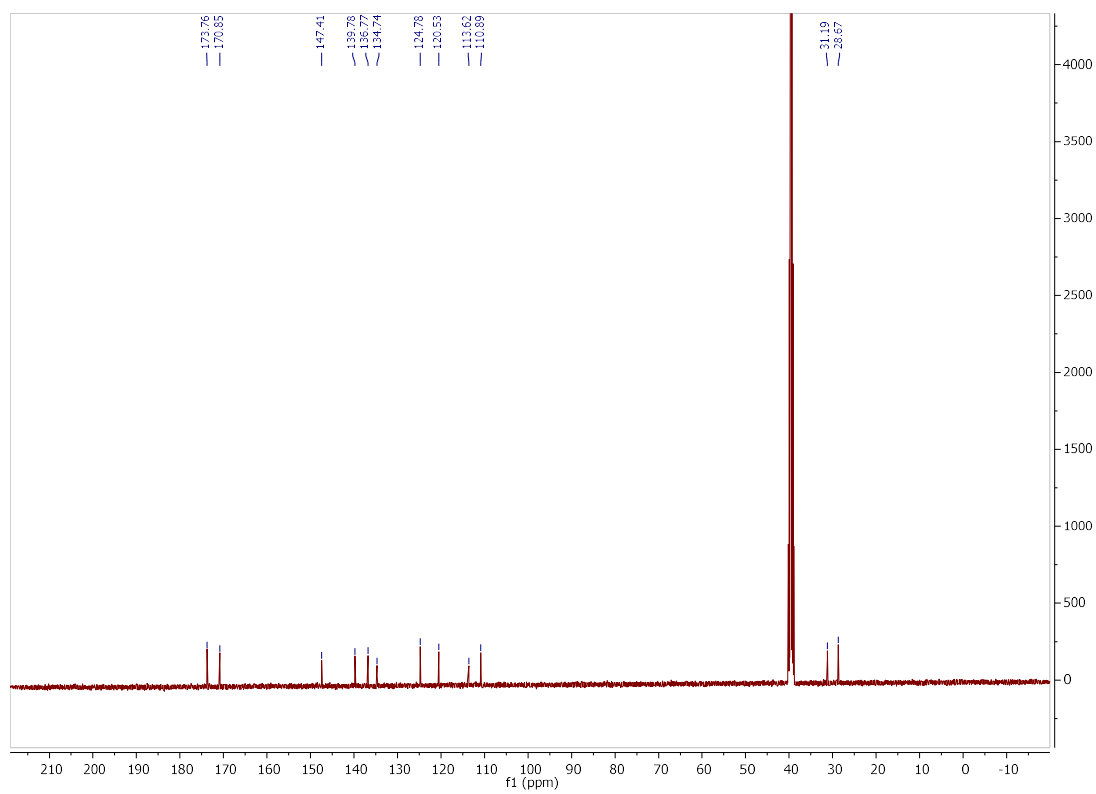

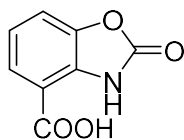

**Compound 125**

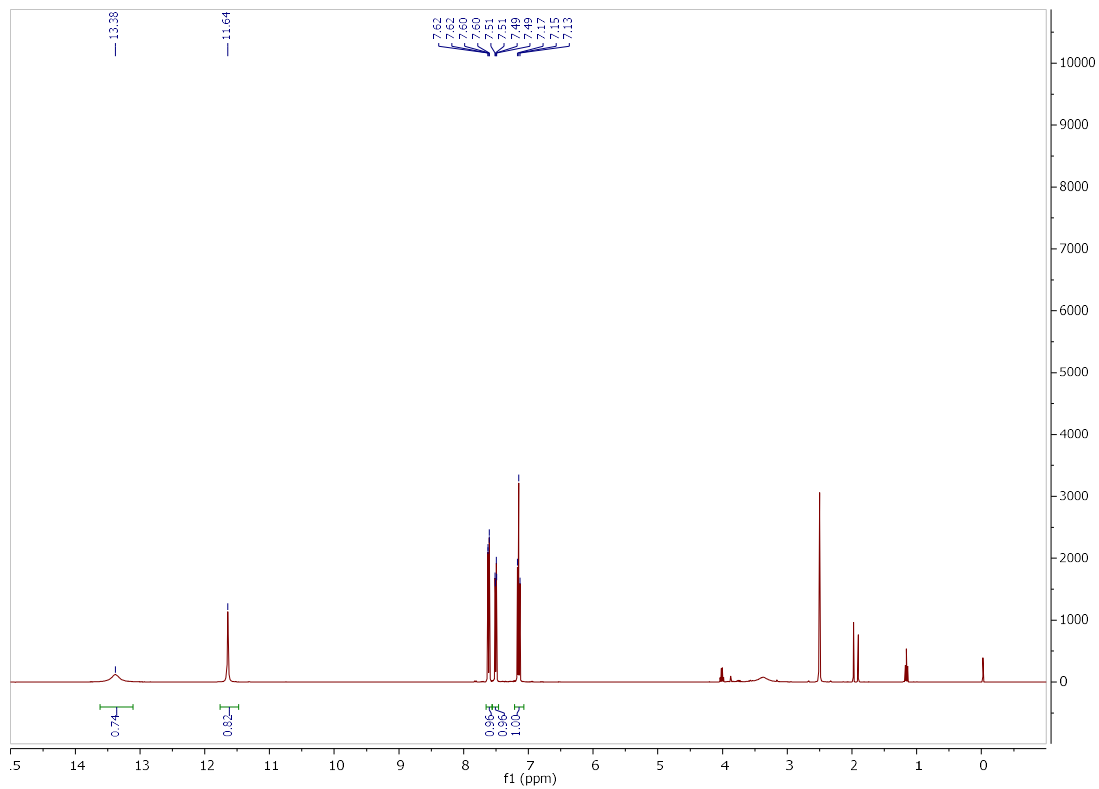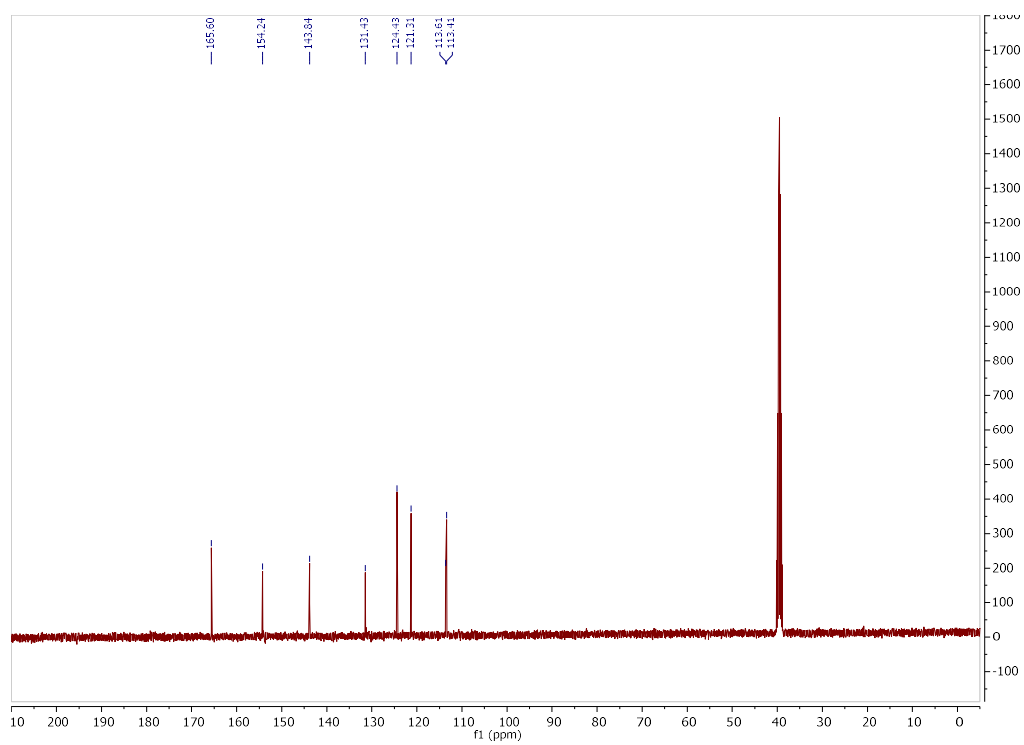

Supplement: bc3c00163_si_002.pdf [file bc3c00163_si_002.pdf]
